# Supplementary material for: Silver-catalyzed radical ring-opening of cycloalkanols for the synthesis of distal acylphosphine oxides
Source: Royal Society of Chemistry journal article supplement (doi:10.1039/d2qo00359g), 2022-01-01

*Supporting Information*

**Silver-Catalyzed Radical Ring-Opening of Cycloalkanols for  
the Synthesis of distal acylphosphine oxides**

Cheng-Kun Li, Adedamola Shoberu, Jian-Ping Zou\*

Key Laboratory of Organic Synthesis of Jiangsu Province, College of Chemistry and Chemical  
Engineering, Soochow University, Jiangsu 215123, China. E-mail: [jpzou@suda.edu.cn](mailto:jpzou@suda.edu.cn)

**Contents**

|                                                                                                                                  |     |
|----------------------------------------------------------------------------------------------------------------------------------|-----|
| 1. General Information .....                                                                                                     | S2  |
| 2. Optimization of Reaction Conditions .....                                                                                     | S2  |
| 3. General Procedure for the Preparation of Diarylphosphine Oxides (GP1) .....                                                   | S7  |
| 4. General Procedure for the Synthesis of Aryl-phenylphosphine Oxides (GP2) .....                                                | S7  |
| 5. General Procedure for the Preparation of Compounds <b>3</b> and <b>4</b> (GP3) .....                                          | S8  |
| 6. Characterization Data for Products <b>3</b> , <b>4</b> , <b>7</b> and <b>8</b> .....                                          | S8  |
| 7. References .....                                                                                                              | S23 |
| 8. <sup>1</sup> H, <sup>13</sup> C and <sup>31</sup> P NMR Spectra of Products <b>3</b> , <b>4</b> , <b>7</b> and <b>8</b> ..... | S24 |

## 1. General Information

All reactions were performed under argon atmosphere.  $^1\text{H}$  NMR (400 MHz or 300 MHz) and  $^{13}\text{C}$  NMR (150, 100 or 75 MHz) spectra were determined on a Varian-Inova 300 MHz or 400 MHz spectrometer with  $\text{CDCl}_3$  or  $\text{DMSO}-d_6$  as solvent and tetramethylsilane (TMS) as internal standard or 85%  $\text{H}_3\text{PO}_4$  as external standard for  $^{31}\text{P}$  NMR (162 MHz). Chemical shifts were reported in ppm from internal TMS ( $\delta$ ), all coupling constants ( $J$  values) were reported in Hertz (Hz). High resolution mass spectra were recorded on a microTOF-Q III (ESI). Column chromatography was performed with 300-400 mesh silica gel using flash column techniques. All of the reagents were used directly as obtained commercially unless otherwise noted.

## 2. Optimization of Reaction Conditions

### 2.1 Optimization of Reaction Conditions for 3a

**Table S1. Screening of Reaction Conditions<sup>a</sup>**

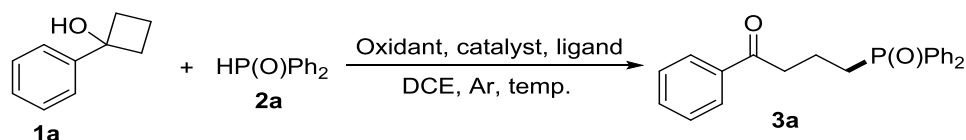

| Entry | Oxidant                  | Catalyst (20 mol %) | Ligand | Temp. (°C) | Yield (%)         |
|-------|--------------------------|---------------------|--------|------------|-------------------|
| 1     | $\text{Mn(OAc)}_3$       | --                  | --     | 60         | N.D. <sup>b</sup> |
| 2     | $\text{CuCl}_2$          | --                  | --     | 60         | N.D. <sup>b</sup> |
| 3     | $\text{CuCl}$            | --                  | --     | 60         | N.D. <sup>b</sup> |
| 4     | TBHP                     | --                  | --     | 60         | N.D. <sup>b</sup> |
| 5     | DTBP                     | --                  | --     | 60         | N.D. <sup>b</sup> |
| 6     | PIDA                     | --                  | --     | 60         | N.D. <sup>b</sup> |
| 7     | $\text{AgNO}_3$          | --                  | --     | 60         | 24                |
| 8     | $\text{AgOAc}$           | --                  | --     | 60         | trace             |
| 9     | $\text{Ag}_2\text{CO}_3$ | --                  | --     | 60         | 23                |
| 10    | $\text{Ag}_2\text{O}$    | --                  | --     | 60         | 22                |
| 11    | $\text{AgOTf}$           | --                  | --     | 60         | trace             |
| 12    | $\text{AgNO}_2$          | --                  | --     | 60         | 12                |
| 13    | $\text{Ag}_2\text{SO}_4$ | --                  | --     | 60         | 35                |
| 14    | $\text{Ag}_2\text{SO}_4$ | --                  | --     | 80         | 42                |
| 15    | $\text{Ag}_2\text{SO}_4$ | $\text{CuCl}$       | bipy   | 80         | N.D. <sup>b</sup> |
| 16    | $\text{Ag}_2\text{SO}_4$ | $\text{CuI}$        | bipy   | 80         | N.D. <sup>b</sup> |
| 17    | $\text{Ag}_2\text{SO}_4$ | $\text{CuOAc}$      | bipy   | 80         | N.D. <sup>b</sup> |
| 18    | $\text{Ag}_2\text{SO}_4$ | $\text{CuTc}$       | bipy   | 80         | N.D. <sup>b</sup> |
| 19    | $\text{Ag}_2\text{SO}_4$ | $\text{Cu(OTf)}_2$  | bipy   | 80         | N.D. <sup>b</sup> |

|    |                                                               |                                 |           |    |                   |
|----|---------------------------------------------------------------|---------------------------------|-----------|----|-------------------|
| 20 | Na <sub>2</sub> S <sub>2</sub> O <sub>8</sub>                 | Ag <sub>2</sub> SO <sub>4</sub> | --        | 80 | 33                |
| 21 | K <sub>2</sub> S <sub>2</sub> O <sub>8</sub>                  | Ag <sub>2</sub> SO <sub>4</sub> | --        | 80 | 48                |
| 22 | K <sub>2</sub> S <sub>2</sub> O <sub>8</sub>                  | Ag <sub>2</sub> SO <sub>4</sub> | bipy      | 80 | 24                |
| 23 | K <sub>2</sub> S <sub>2</sub> O <sub>8</sub>                  | Ag <sub>2</sub> SO <sub>4</sub> | 1,10-phen | 80 | 22                |
| 24 | K <sub>2</sub> S <sub>2</sub> O <sub>8</sub>                  | Ag <sub>2</sub> SO <sub>4</sub> | TMEDA     | 80 | 25                |
| 25 | (NH <sub>4</sub> ) <sub>2</sub> S <sub>2</sub> O <sub>8</sub> | Ag <sub>2</sub> SO <sub>4</sub> | --        | 80 | 61                |
| 26 | Mg(NO <sub>3</sub> ) <sub>2</sub>                             | Ag <sub>2</sub> SO <sub>4</sub> | --        | 80 | N.D. <sup>b</sup> |
| 27 | LPO                                                           | Ag <sub>2</sub> SO <sub>4</sub> | --        | 80 | N.D. <sup>b</sup> |

<sup>a</sup> Conditions: **1a** (0.1 mmol), Ph<sub>2</sub>P(O)H (0.2 mmol), catalyst (0.02 mmol), oxidant (0.3 mmol), DCE (1 mL) under argon atmosphere for 12 h. <sup>b</sup> N.D. means not detected.

**Table S2. Screening of Solvents and Temperature<sup>a</sup>**

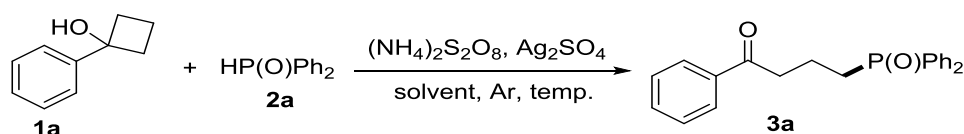

| Entry | Oxidant                                                       | Catalyst (20 mol %)             | Solvent                  | Temp. (°C) | Yield (%)         |
|-------|---------------------------------------------------------------|---------------------------------|--------------------------|------------|-------------------|
| 1     | (NH <sub>4</sub> ) <sub>2</sub> S <sub>2</sub> O <sub>8</sub> | Ag <sub>2</sub> SO <sub>4</sub> | DCE                      | 80         | 61                |
| 2     | (NH <sub>4</sub> ) <sub>2</sub> S <sub>2</sub> O <sub>8</sub> | Ag <sub>2</sub> SO <sub>4</sub> | MeCN                     | 80         | 46                |
| 3     | (NH <sub>4</sub> ) <sub>2</sub> S <sub>2</sub> O <sub>8</sub> | Ag <sub>2</sub> SO <sub>4</sub> | PhH                      | 80         | 52                |
| 4     | (NH <sub>4</sub> ) <sub>2</sub> S <sub>2</sub> O <sub>8</sub> | Ag <sub>2</sub> SO <sub>4</sub> | PhF                      | 80         | 54                |
| 5     | (NH <sub>4</sub> ) <sub>2</sub> S <sub>2</sub> O <sub>8</sub> | Ag <sub>2</sub> SO <sub>4</sub> | Toluene                  | 80         | 67                |
| 6     | (NH <sub>4</sub> ) <sub>2</sub> S <sub>2</sub> O <sub>8</sub> | Ag <sub>2</sub> SO <sub>4</sub> | DMF                      | 80         | trace             |
| 7     | (NH <sub>4</sub> ) <sub>2</sub> S <sub>2</sub> O <sub>8</sub> | Ag <sub>2</sub> SO <sub>4</sub> | DMSO                     | 80         | N.D. <sup>b</sup> |
| 8     | (NH <sub>4</sub> ) <sub>2</sub> S <sub>2</sub> O <sub>8</sub> | Ag <sub>2</sub> SO <sub>4</sub> | DME                      | 80         | 41                |
| 9     | (NH <sub>4</sub> ) <sub>2</sub> S <sub>2</sub> O <sub>8</sub> | Ag <sub>2</sub> SO <sub>4</sub> | THF                      | 80         | trace             |
| 10    | (NH <sub>4</sub> ) <sub>2</sub> S <sub>2</sub> O <sub>8</sub> | Ag <sub>2</sub> SO <sub>4</sub> | 1,4-Dioxane              | 80         | 23                |
| 11    | (NH <sub>4</sub> ) <sub>2</sub> S <sub>2</sub> O <sub>8</sub> | Ag <sub>2</sub> SO <sub>4</sub> | EtOAc                    | 80         | 14                |
| 12    | (NH <sub>4</sub> ) <sub>2</sub> S <sub>2</sub> O <sub>8</sub> | Ag <sub>2</sub> SO <sub>4</sub> | Cyclohexane              | 80         | 16                |
| 13    | (NH <sub>4</sub> ) <sub>2</sub> S <sub>2</sub> O <sub>8</sub> | Ag <sub>2</sub> SO <sub>4</sub> | CHCl <sub>3</sub>        | 80         | N.D. <sup>b</sup> |
| 14    | (NH <sub>4</sub> ) <sub>2</sub> S <sub>2</sub> O <sub>8</sub> | Ag <sub>2</sub> SO <sub>4</sub> | PhCl                     | 80         | 66                |
| 15    | (NH <sub>4</sub> ) <sub>2</sub> S <sub>2</sub> O <sub>8</sub> | Ag <sub>2</sub> SO <sub>4</sub> | Toluene                  | 60         | 44                |
| 16    | (NH <sub>4</sub> ) <sub>2</sub> S <sub>2</sub> O <sub>8</sub> | Ag <sub>2</sub> SO <sub>4</sub> | Toluene                  | 70         | 59                |
| 17    | (NH <sub>4</sub> ) <sub>2</sub> S <sub>2</sub> O <sub>8</sub> | Ag <sub>2</sub> SO <sub>4</sub> | Toluene                  | 90         | 76                |
| 18    | (NH <sub>4</sub> ) <sub>2</sub> S <sub>2</sub> O <sub>8</sub> | Ag <sub>2</sub> SO <sub>4</sub> | DMF                      | 90         | 19                |
| 19    | (NH <sub>4</sub> ) <sub>2</sub> S <sub>2</sub> O <sub>8</sub> | Ag <sub>2</sub> SO <sub>4</sub> | MeCN                     | 90         | 52                |
| 20    | (NH <sub>4</sub> ) <sub>2</sub> S <sub>2</sub> O <sub>8</sub> | Ag <sub>2</sub> SO <sub>4</sub> | Toluene/H <sub>2</sub> O | 90         | 44                |
| 21    | (NH <sub>4</sub> ) <sub>2</sub> S <sub>2</sub> O <sub>8</sub> | Ag <sub>2</sub> SO <sub>4</sub> | PhH                      | 90         | 60                |
| 22    | (NH <sub>4</sub> ) <sub>2</sub> S <sub>2</sub> O <sub>8</sub> | Ag <sub>2</sub> SO <sub>4</sub> | PhF                      | 90         | 59                |
| 23    | (NH <sub>4</sub> ) <sub>2</sub> S <sub>2</sub> O <sub>8</sub> | Ag <sub>2</sub> SO <sub>4</sub> | PhCl                     | 90         | 69                |

<sup>a</sup> Conditions: **1a** (0.1 mmol), Ph<sub>2</sub>P(O)H (0.2 mmol), catalyst (0.02 mmol), oxidant (0.3 mmol), solvent (1 mL) under argon atmosphere for 12 h. <sup>b</sup> N.D. means not detected.

## 2.2 Optimization of Reaction Conditions for **4j**

**Table S3. Screening of oxidant<sup>a</sup>**

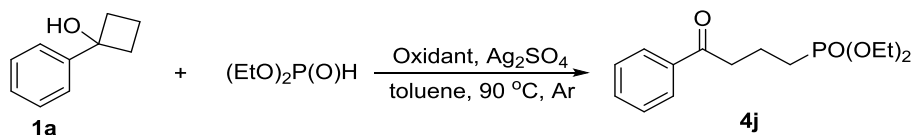

| Entry | Oxidant                               | Yield (%)         |
|-------|---------------------------------------|-------------------|
| 1     | TBHP                                  | N.D. <sup>b</sup> |
| 2     | DTBP                                  | N.D. <sup>b</sup> |
| 3     | BPO                                   | N.D. <sup>b</sup> |
| 4     | $\text{K}_2\text{S}_2\text{O}_8$      | N.D. <sup>b</sup> |
| 5     | $\text{Na}_2\text{S}_2\text{O}_8$     | N.D. <sup>b</sup> |
| 6     | $(\text{NH}_4)_2\text{S}_2\text{O}_8$ | N.D. <sup>b</sup> |
| 7     | PIDA                                  | N.D. <sup>b</sup> |

<sup>a</sup> Conditions: **1a** (0.1 mmol),  $(\text{EtO})_2\text{P}(\text{O})\text{H}$  (0.2 mmol),  $\text{Ag}_2\text{SO}_4$  (0.02 mmol), oxidant (0.3 mmol), toluene (1 mL) under argon atmosphere at 90 °C for 12 h. <sup>b</sup> N.D. means not detected.

**Table S4. Screening of silver catalyst<sup>a</sup>**

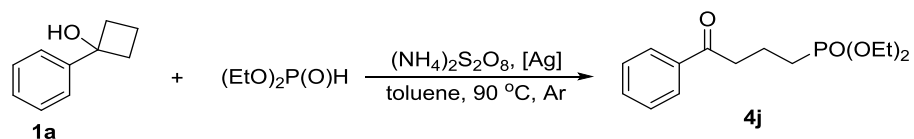

| Entry | [Ag]                     | Yield (%)         |
|-------|--------------------------|-------------------|
| 1     | $\text{AgNO}_3$          | N.D. <sup>b</sup> |
| 2     | $\text{AgOAc}$           | N.D. <sup>b</sup> |
| 3     | $\text{Ag}_2\text{CO}_3$ | N.D. <sup>b</sup> |
| 4     | $\text{Ag}_2\text{O}$    | N.D. <sup>b</sup> |
| 5     | $\text{AgOTf}$           | N.D. <sup>b</sup> |
| 6     | $\text{AgNO}_2$          | N.D. <sup>b</sup> |
| 7     | $\text{AgTFA}$           | N.D. <sup>b</sup> |
| 8     | $\text{AgOTs}$           | N.D. <sup>b</sup> |
| 9     | $\text{AgBF}_4$          | N.D. <sup>b</sup> |
| 10    | $\text{AgSbF}_6$         | N.D. <sup>b</sup> |

<sup>a</sup> Conditions: **1a** (0.1 mmol),  $(\text{EtO})_2\text{P}(\text{O})\text{H}$  (0.2 mmol), [Ag] (0.02 mmol),  $(\text{NH}_4)_2\text{S}_2\text{O}_8$  (0.3 mmol), toluene (1 mL) under argon atmosphere at 90 °C for 12 h. <sup>b</sup> N.D. means not detected.

**Table S5. Screening of copper catalyst<sup>a</sup>**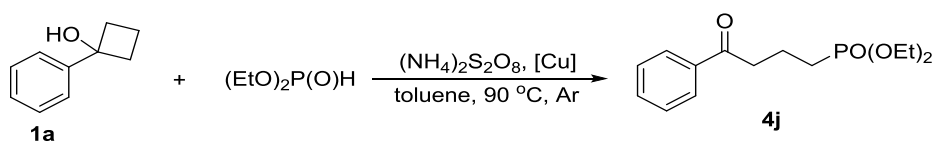

| Entry | [Cu]                  | Yield (%)         |
|-------|-----------------------|-------------------|
| 1     | CuBr                  | N.D. <sup>b</sup> |
| 2     | CuI                   | Trace             |
| 3     | CuOAc                 | Trace             |
| 4     | CuTc                  | N.D. <sup>b</sup> |
| 5     | Cu(OTf) <sub>2</sub>  | Trace             |
| 6     | Cu(acac) <sub>2</sub> | Trace             |
| 7     | CuSO <sub>4</sub>     | N.D. <sup>b</sup> |
| 8     | Cu(OAc) <sub>2</sub>  | N.D. <sup>b</sup> |
| 9     | CuBr <sub>2</sub>     | N.D. <sup>b</sup> |
| 10    | CuBr                  | N.D. <sup>b</sup> |

<sup>a</sup> Conditions: **1a** (0.1 mmol),  $(\text{EtO})_2\text{P}(\text{O})\text{H}$  (0.2 mmol), Cu salt (0.02 mmol),  $(\text{NH}_4)_2\text{S}_2\text{O}_8$  (0.3 mmol), toluene (1 mL) under argon atmosphere at 90 °C for 12 h. <sup>b</sup> N.D. means not detected.

**Table S6. Screening of  $\text{Ag}_2\text{SO}_4/[\text{Cu}]$  co-catalyst<sup>a</sup>**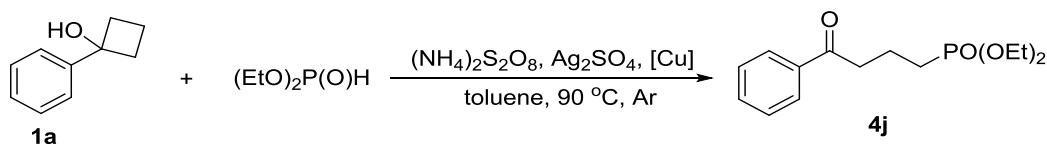

| Entry | [Cu]                  | Yield (%)         |
|-------|-----------------------|-------------------|
| 1     | CuBr                  | Trace             |
| 2     | CuI                   | Trace             |
| 3     | CuOAc                 | Trace             |
| 4     | CuTc                  | Trace             |
| 5     | Cu(OTf) <sub>2</sub>  | Trace             |
| 6     | Cu(acac) <sub>2</sub> | Trace             |
| 7     | CuSO <sub>4</sub>     | Trace             |
| 8     | Cu(OAc) <sub>2</sub>  | Trace             |
| 9     | CuBr <sub>2</sub>     | N.D. <sup>b</sup> |

<sup>a</sup> Conditions: **1a** (0.1 mmol),  $(\text{EtO})_2\text{P}(\text{O})\text{H}$  (0.2 mmol),  $\text{Ag}_2\text{SO}_4$  (0.02 mmol), Cu salt (0.02 mmol),  $(\text{NH}_4)_2\text{S}_2\text{O}_8$  (0.3 mmol), toluene (1 mL) under argon atmosphere at 90 °C for 12 h. <sup>b</sup> N.D. means not detected.

**Diethyl (4-oxo-4-phenylbutyl)phosphonate (4j)**

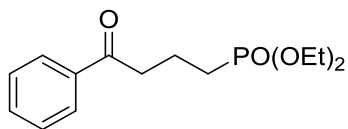

**HRMS (ESI-TOF)  $m/z$ :**  $[M+H]^+$  Calcd for  $C_{14}H_{22}O_4P$  285.1256, found 285.1255;  $[M+Na]^+$  Calcd for  $C_{14}H_{21}NaO_4P$  307.1075, found 307.1093.

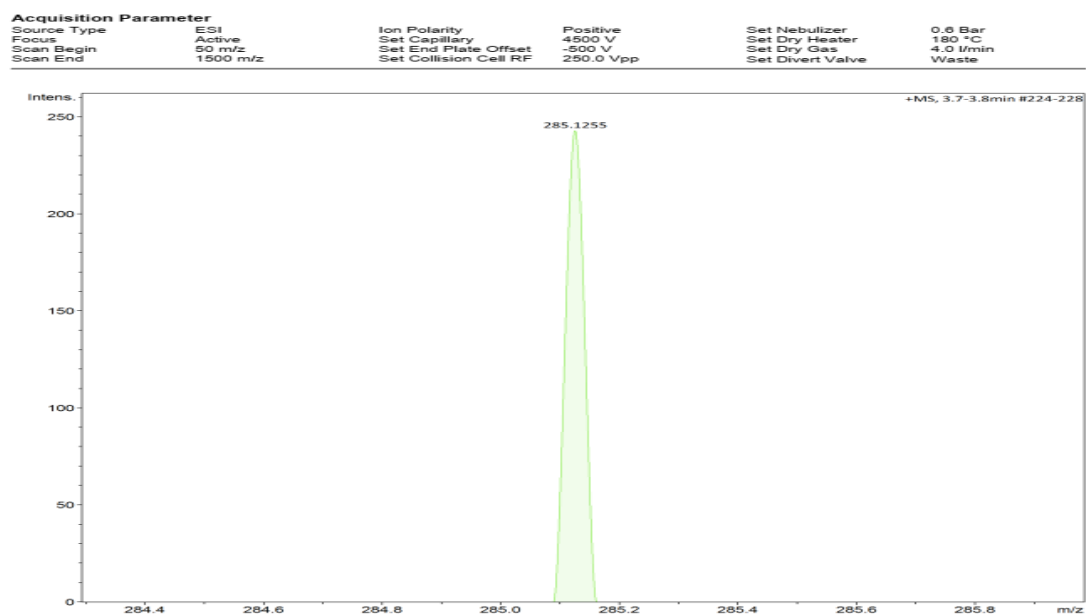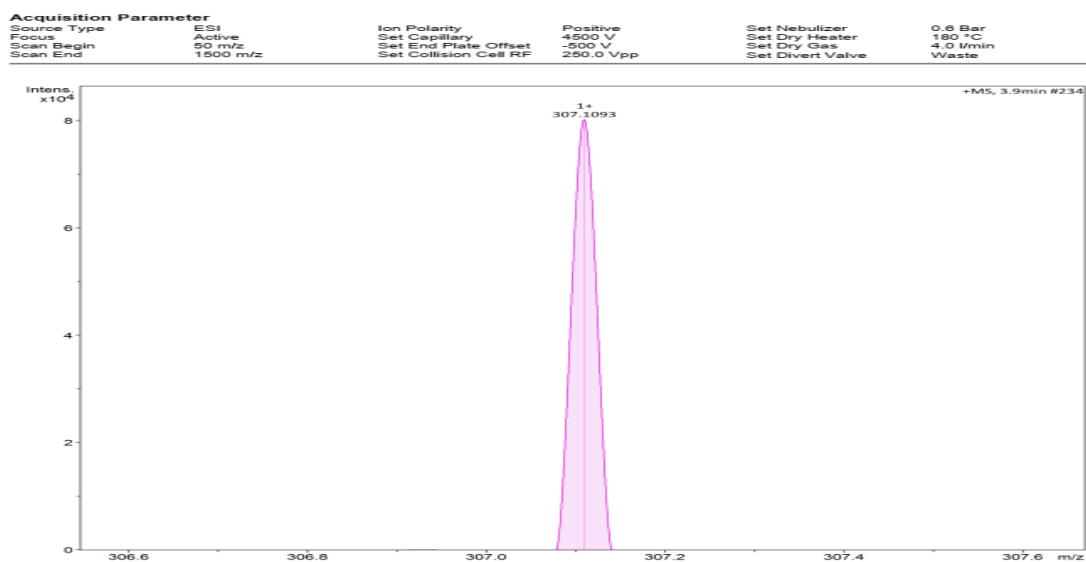

### 3. General Procedure for the Preparation of Diarylphosphine Oxides (GP1)

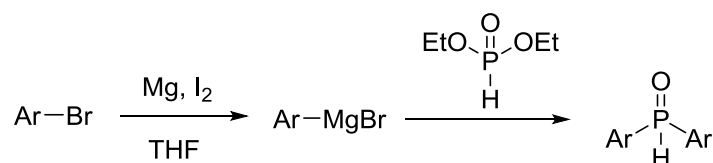

Arylmagnesium bromide was prepared from the corresponding aryl bromide (22 mmol), a grain of iodine and magnesium (57.6 mg, 24 mmol) in dry THF. Then, diethyl phosphite (1.29 mL, 10.0 mmol) was added drop-wise to a 2.5 M solution of the prepared arylmagnesium bromide at 0 °C. The mixture was cooled at 0 °C for 30 minutes, and then stirred at ambient temperature for 2-12 hours. Afterwards, the mixture was allowed to cool to 0 °C, followed by the slow addition of 30 mL aqueous NH<sub>4</sub>Cl. The mixture was extracted with ethyl acetate, dried over with Mg<sub>2</sub>SO<sub>4</sub>, and the solvent was completely removed under vacuum. The residue was purified by column chromatography on silica gel using petroleum ether/ethyl acetate (v : v = 1 : 1) as eluent to give the product.<sup>1,2</sup>

### 4. General Procedure for the Synthesis of Aryl-phenylphosphine Oxides (GP2)

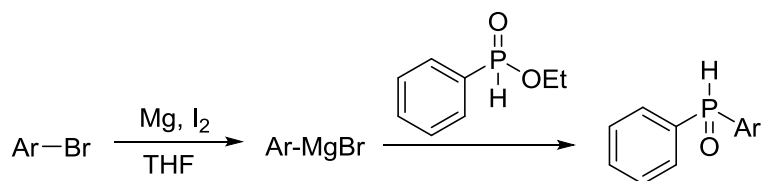

Arylmagnesium bromide was prepared from the corresponding aryl bromide (22 mmol), a grain of iodine and magnesium (57.6 mg, 24 mmol) in dry THF. Afterwards, ethyl phenylphosphinate (1701 mg, 10.0 mmol) was added in a drop-wise manner to a solution of the prepared arylmagnesium bromide at 0 °C. The mixture was allowed to cool at 0 °C for 30 minutes, and then stirred at ambient temperature for 2-12 hours. Afterwards, the mixture was allowed to cool to 0 °C, followed by the slow addition of 30 mL aqueous NH<sub>4</sub>Cl. The mixture was extracted with ethyl acetate, dried over with Mg<sub>2</sub>SO<sub>4</sub>, and the solvent was completely removed under vacuum. The residue was purified by column chromatography on silica gel using petroleum ether/ethyl acetate (v : v = 1 : 1) as eluent to give the product.<sup>3,4</sup>

|                                                                                   |                                                                                   |                                                                                     |
|-----------------------------------------------------------------------------------|-----------------------------------------------------------------------------------|-------------------------------------------------------------------------------------|
| 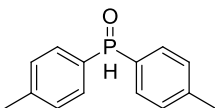 |  |  |
| Ref. 1                                                                            | Ref. 1                                                                            | Ref. 3                                                                              |
|  |  |  |
| Ref. 1                                                                            | Ref. 4                                                                            | Ref. 4                                                                              |
|  |  |  |
| Ref. 1                                                                            | Ref. 3                                                                            | Ref. 2                                                                              |

## 5. General Procedure for the Preparation of Compounds 3 and 4 (GP3)

To a Schlenk tube was successively added cycloalkanol **1** (0.1 mmol), phosphine oxide **2** (0.2 mmol, 2 equiv), Ag<sub>2</sub>SO<sub>4</sub> (6.2 mg, 0.02 mmol), (NH<sub>4</sub>)<sub>2</sub>S<sub>2</sub>O<sub>8</sub> (68.5 mg, 0.3 mmol), and toluene (1 mL). The tube was sealed and then backfilled thrice with argon. The mixture was allowed to stir at 90 °C for 12 hours. Afterwards, the reaction mixture was cooled to room temperature, diluted with ethyl acetate, and filtered. The filtrate was concentrated under vacuum, and the residue was purified by column chromatography on silica gel using acetone/petroleum ether (v : v = 1 : 1.86) as eluent to give pure products **3** or **4**.

## 6. Characterization Data for Products 3, 4, 7 and 8

### 4-(Diphenylphosphoryl)-1-phenylbutan-1-one (3a)

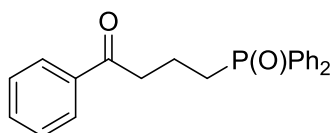

According to the general procedure (**GP3**) using 1-phenylcyclobutanol **1a** (14.9 mg, 0.1 mmol) and diphenylphosphine oxide **2a** (40.5 mg, 0.2 mmol), compound **3a** was obtained as colorless oil (26.5 mg, 76%). <sup>1</sup>H NMR (400 MHz, CDCl<sub>3</sub>): δ 7.92–7.87 (m, 2H), 7.81–7.72 (m, 4H), 7.57–7.38 (m, 9H), 3.15 (t, *J* = 6.6 Hz, 2H), 2.45–2.36 (m, 2H), 2.16–2.04 (m, 2H); <sup>13</sup>C NMR (100 MHz, CDCl<sub>3</sub>): δ 199.5, 136.8, 133.5, 133.3, 132.5, 131.89, 131.87, 131.0, 130.9, 128.9, 128.8, 128.7,



128.1, 38.8 (d,  $J = 12.2$  Hz), 29.0 (d,  $J = 71.9$  Hz), 16.6 (d,  $J = 3.4$  Hz);  $^{31}\text{P}$  NMR (162 MHz,  $\text{CDCl}_3$ ):  $\delta$  33.0. **HRMS (ESI-TOF)**  $m/z$ :  $[\text{M}+\text{H}]^+$  Calcd for  $\text{C}_{22}\text{H}_{22}\text{O}_2\text{P}$  349.1357, found 349.1360.

#### 4-(Diphenylphosphoryl)-1-(*o*-tolyl)butan-1-one (3b)

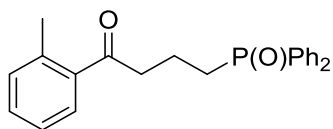

According to the general procedure (**GP3**) using 1-(*o*-tolyl)cyclobutanol **1b** (16.3 mg, 0.1 mmol) and diphenylphosphine oxide **2a** (40.5 mg, 0.2 mmol), compound **3b** was obtained as colorless oil (29.4 mg, 81%).  $^1\text{H}$  NMR (400 MHz,  $\text{CDCl}_3$ ):  $\delta$  7.81–7.70 (m, 4H), 7.58–7.53 (m, 1H), 7.50–7.40 (m, 6H), 7.33 (td,  $J = 7.4, 1.4$  Hz, 1H), 7.24–7.16 (m, 2H), 3.05 (t,  $J = 6.8$  Hz, 2H), 2.45 (s, 3H), 2.42 – 2.28 (m, 2H), 2.13 – 1.96 (m, 2H);  $^{13}\text{C}$  NMR (100 MHz,  $\text{CDCl}_3$ ):  $\delta$  203.3, 138.0, 137.6, 133.5, 132.6, 132.0, 131.79, 131.77, 131.4, 130.9, 130.8, 128.8, 128.7, 128.6, 125.8, 41.6 (d,  $J = 12.1$  Hz), 29.0 (d,  $J = 71.8$  Hz), 21.4, 16.8 (d,  $J = 3.4$  Hz);  $^{31}\text{P}$  NMR (162 MHz,  $\text{CDCl}_3$ ):  $\delta$  32.5. **HRMS (ESI-TOF)**  $m/z$ :  $[\text{M}+\text{Na}]^+$  Calcd for  $\text{C}_{23}\text{H}_{23}\text{NaO}_2\text{P}$  385.1333, found 385.1338.

#### 4-(Diphenylphosphoryl)-1-(*p*-tolyl)butan-1-one (3c)

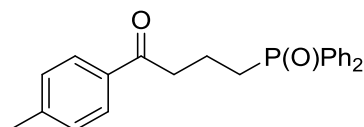

According to the general procedure (**GP3**) using 1-(*p*-tolyl)cyclobutanol **1c** (16.3 mg, 0.1 mmol) and diphenylphosphine oxide **2a** (40.5 mg, 0.2 mmol), compound **3c** was obtained as colorless oil (30.8 mg, 85%).  $^1\text{H}$  NMR (400 MHz,  $\text{CDCl}_3$ ):  $\delta$  7.82–7.74 (m, 4H), 7.70 (d,  $J = 8.4$  Hz, 2H), 7.55–7.40 (m, 6H), 7.38–7.27 (m, 2H), 3.14 (t,  $J = 6.7$  Hz, 2H), 2.48–2.33 (m, 5H), 2.19–2.03 (m, 2H);  $^{13}\text{C}$  NMR (100 MHz,  $\text{CDCl}_3$ ):  $\delta$  199.6, 138.4, 136.8, 134.0, 133.6, 132.6, 131.78, 131.75, 130.9, 130.8, 128.8, 128.7, 128.6, 128.5, 125.3, 38.8 (d,  $J = 12.2$  Hz), 28.9 (d,  $J = 71.9$  Hz), 21.4, 16.6 (d,  $J = 3.4$  Hz);  $^{31}\text{P}$  NMR (162 MHz,  $\text{CDCl}_3$ ):  $\delta$  32.6. **HRMS (ESI-TOF)**  $m/z$ :  $[\text{M}+\text{Na}]^+$  Calcd for  $\text{C}_{23}\text{H}_{23}\text{NaO}_2\text{P}$  385.1333, found 385.1340.

#### 4-(Diphenylphosphoryl)-1-(4-methoxyphenyl)butan-1-one (3d)

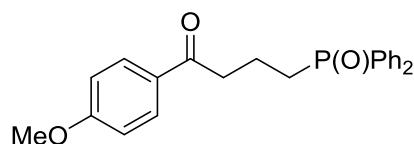

According to the general procedure (**GP3**) using 1-(4-methoxyphenyl)cyclobutanol **1d** (17.9 mg, 0.1 mmol) and diphenylphosphine oxide **2a** (40.5 mg, 0.2 mmol), compound **3d** was obtained as colorless oil (26.1 mg, 69%). **<sup>1</sup>H NMR** (400 MHz, CDCl<sub>3</sub>):  $\delta$  7.91–7.86 (m, 2H), 7.82–7.73 (m, 4H), 7.54–7.40 (m, 6H), 6.90 (d,  $J$  = 8.9 Hz, 2H), 3.86 (s, 3H), 3.09 (t,  $J$  = 6.6 Hz, 2H), 2.55–2.30 (m, 2H), 2.15–2.01 (m, 2H). **<sup>13</sup>C NMR** (100 MHz, CDCl<sub>3</sub>):  $\delta$  198.1, 163.6, 133.7, 132.7, 131.83, 131.81, 131.0, 130.9, 130.4, 130.0, 128.9, 128.7, 113.9, 55.6, 38.5 (d,  $J$  = 12.2 Hz), 29.1 (d,  $J$  = 71.9 Hz), 16.9 (d,  $J$  = 3.5 Hz); **<sup>31</sup>P NMR** (162 MHz, CDCl<sub>3</sub>):  $\delta$  32.7. **HRMS (ESI-TOF)  $m/z$** : [M+H]<sup>+</sup> Calcd for C<sub>23</sub>H<sub>24</sub>O<sub>3</sub>P 379.1463, found 379.1456.

#### 1-(4-(*tert*-Butyl)phenyl)-4-(diphenylphosphoryl)butan-1-one (3e)

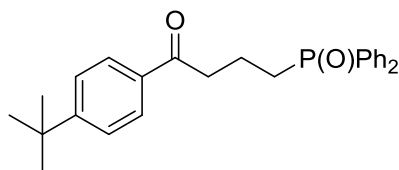

According to the general procedure (**GP3**) using 1-(4-(*tert*-butyl)phenyl)cyclobutanol **1e** (20.5 mg, 0.1 mmol) and diphenylphosphine oxide **2a** (40.5 mg, 0.2 mmol), compound **3e** was obtained as colorless oil (34.3 mg, 85%). **<sup>1</sup>H NMR** (400 MHz, CDCl<sub>3</sub>):  $\delta$  7.85 (d,  $J$  = 8.6 Hz, 2H), 7.81–7.73 (m, 4H), 7.50–7.42 (m, 8H), 3.12 (t,  $J$  = 6.6 Hz, 2H), 2.48–2.32 (m, 2H), 2.15–2.01 (m, 2H), 1.33 (s, 9H). **<sup>13</sup>C NMR** (100 MHz, CDCl<sub>3</sub>):  $\delta$  199.2, 157.1, 134.3, 131.9, 131.1, 128.9, 128.1, 125.7, 38.8, 35.2, 31.2, 16.7; **<sup>31</sup>P NMR** (162 MHz, CDCl<sub>3</sub>):  $\delta$  32.7. **HRMS (ESI-TOF)  $m/z$** : [M+H]<sup>+</sup> Calcd for C<sub>26</sub>H<sub>30</sub>O<sub>2</sub>P 405.1983, found 405.1977.

#### 4-(Diphenylphosphoryl)-1-(4-fluorophenyl)butan-1-one (3f)

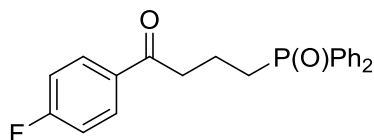

According to the general procedure (**GP3**) using 1-(4-fluorophenyl)cyclobutanol **1f** (16.7 mg, 0.1 mmol) and diphenylphosphine oxide **2a** (40.5 mg, 0.2 mmol), compound **3f** was obtained as colorless oil (23.8 mg, 65%). **<sup>1</sup>H NMR** (400 MHz, CDCl<sub>3</sub>):  $\delta$  7.98–7.89 (m, 2H), 7.83–7.70 (m, 4H), 7.55–7.42 (m, 6H), 7.10 (t,  $J$  = 8.6 Hz, 2H), 3.13 (t,  $J$  = 6.7 Hz, 2H), 2.48–2.33 (m, 2H), 2.20–2.01 (m, 2H); **<sup>13</sup>C NMR** (100 MHz, CDCl<sub>3</sub>):  $\delta$  197.9, 165.9 (d,  $J$  = 254.8 Hz), 133.6, 133.3 (d,  $J$  = 3.2 Hz), 132.6, 131.90, 131.88, 131.0, 130.9, 130.8, 130.7, 128.9, 128.8, 115.9, 115.7, 38.7 (d,  $J$  = 11.5 Hz), 28.9 (d,  $J$  = 71.9 Hz), 16.7 (d,  $J$  = 3.5 Hz); **<sup>31</sup>P NMR** (162 MHz, CDCl<sub>3</sub>):  $\delta$  32.6. **HRMS (ESI-TOF)**  $m/z$ : [M+H]<sup>+</sup> Calcd for C<sub>22</sub>H<sub>21</sub>FO<sub>2</sub>P 367.1263, found 367.1267.

#### 1-(4-Chlorophenyl)-4-(diphenylphosphoryl)butan-1-one (**3g**)

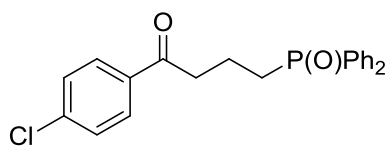

According to the general procedure (**GP3**) using 1-(4-chlorophenyl)cyclobutanol **1g** (18.3 mg, 0.1 mmol) and diphenylphosphine oxide **2a** (40.5 mg, 0.2 mmol), compound **3g** was obtained as colorless oil (26.7 mg, 70%). **<sup>1</sup>H NMR** (400 MHz, CDCl<sub>3</sub>):  $\delta$  7.86–7.81 (m, 2H), 7.80–7.71 (m, 4H), 7.53–7.42 (m, 6H), 7.41–7.37 (m, 2H), 3.13 (t,  $J$  = 6.7 Hz, 2H), 2.44–2.34 (m, 2H), 2.10–2.03 (m, 2H); **<sup>13</sup>C NMR** (100 MHz, CDCl<sub>3</sub>):  $\delta$  198.2, 139.7, 135.1, 133.5, 132.6, 131.89, 131.87, 130.9, 130.8, 129.5, 129.0, 128.9, 128.8, 38.7 (d,  $J$  = 11.4 Hz), 28.8 (d,  $J$  = 71.9 Hz), 16.6 (d,  $J$  = 3.6 Hz); **<sup>31</sup>P NMR** (162 MHz, CDCl<sub>3</sub>):  $\delta$  32.6. **HRMS (ESI-TOF)**  $m/z$ : [M+H]<sup>+</sup> Calcd for C<sub>22</sub>H<sub>21</sub>ClO<sub>2</sub>P 383.0968, found 383.0960.

#### 1-(4-Bromophenyl)-4-(diphenylphosphoryl)butan-1-one (**3h**)

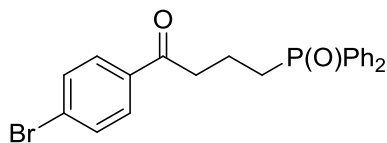

According to the general procedure (**GP3**) using 1-(4-bromophenyl)cyclobutanol **1h** (22.6 mg, 0.1 mmol) and diphenylphosphine oxide **2a** (40.5 mg, 0.2 mmol), compound **3h** was obtained as colorless oil (32.8 mg, 77%). <sup>1</sup>H NMR (400 MHz, CDCl<sub>3</sub>): δ 7.78–7.71 (m, 6H), 7.56–7.52 (m, 2H), 7.5–7.40 (m, 6H), 3.10 (t, *J* = 6.7 Hz, 2H), 2.43–2.33 (m, 2H), 2.14–1.99 (m, 2H); <sup>13</sup>C NMR (100 MHz, CDCl<sub>3</sub>): δ 198.3, 135.3, 133.4, 132.5, 131.8, 130.7, 129.5, 128.7, 128.3, 38.5, 28.7 (d, *J* = 71.6 Hz), 16.5; <sup>31</sup>P NMR (162 MHz, CDCl<sub>3</sub>): δ 32.5. HRMS (ESI-TOF) *m/z*: [M+Na]<sup>+</sup> Calcd for C<sub>22</sub>H<sub>20</sub>BrNaO<sub>2</sub>P 449.0282, found 449.0280.

#### 4-(Diphenylphosphoryl)-1-(naphthalen-2-yl)butan-1-one (3i)

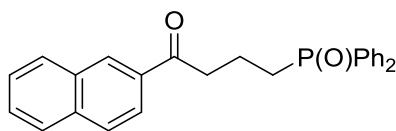

According to the general procedure (**GP3**) using 1-(naphthalen-2-yl)cyclobutanol **1i** (19.9 mg, 0.1 mmol) and diphenylphosphine oxide **2a** (40.5 mg, 0.2 mmol), compound **3i** was obtained as colorless oil (29.8 mg, 75%). <sup>1</sup>H NMR (400 MHz, CDCl<sub>3</sub>): δ 8.58 (d, *J* = 8.5 Hz, 1H), 7.97 (d, *J* = 8.2 Hz, 1H), 7.88–7.85 (m, 1H), 7.82 (dd, *J* = 7.2, 0.9 Hz, 1H), 7.79–7.73 (m, 4H), 7.61–7.42 (m, 9H), 3.23 (t, *J* = 6.7 Hz, 2H), 2.50–2.41 (m, 2H), 2.23–2.09 (m, 2H); <sup>13</sup>C NMR (100 MHz, CDCl<sub>3</sub>): δ 203.7, 135.6, 134.1, 132.9, 131.92, 131.89, 131.0, 130.9, 130.2, 128.9, 128.8, 128.6, 128.1, 128.0, 126.6, 125.8, 124.5, 42.1 (d, *J* = 12.2 Hz), 29.0 (d, *J* = 71.3 Hz), 17.2 (d, *J* = 3.4 Hz); <sup>31</sup>P NMR (162 MHz, CDCl<sub>3</sub>): δ 32.9. HRMS (ESI-TOF) *m/z*: [M+H]<sup>+</sup> Calcd for C<sub>26</sub>H<sub>24</sub>O<sub>2</sub>P 399.1514, found 399.1510.

#### 4-(Diphenylphosphoryl)-1-(thiophen-2-yl)butan-1-one (3j)

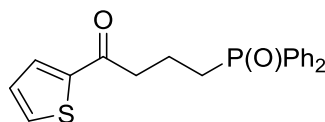

According to the general procedure (**GP3**) using 1-(thiophen-2-yl)cyclobutanol **1j** (15.5 mg, 0.1 mmol) and diphenylphosphine oxide **2a** (40.5 mg, 0.2 mmol), compound **3j** was obtained as colorless oil (18.1 mg, 51%). <sup>1</sup>H NMR (400 MHz, CDCl<sub>3</sub>): δ 7.81–7.72 (m, 4H), 7.66 (d, *J* = 3.8

Hz, 1H), 7.61 (d,  $J = 4.9$  Hz, 1H), 7.54–7.41 (m, 6H), 7.10 (t,  $J = 4.4$  Hz, 1H), 3.08 (t,  $J = 6.7$  Hz, 2H), 2.45–2.35 (m, 2H), 2.17–2.04 (m, 2H);  $^{13}\text{C}$  NMR (100 MHz,  $\text{CDCl}_3$ ):  $\delta$  192.5, 144.2, 133.8, 133.5, 132.6, 132.2, 131.90, 131.87, 131.0, 130.9, 128.9, 128.8, 128.3, 39.5, 29.0 (d,  $J = 71.9$  Hz), 17.0 (d,  $J = 3.4$  Hz);  $^{31}\text{P}$  NMR (162 MHz,  $\text{CDCl}_3$ ):  $\delta$  32.6. HRMS (ESI-TOF)  $m/z$ :  $[\text{M}+\text{H}]^+$  Calcd for  $\text{C}_{20}\text{H}_{20}\text{O}_2\text{PS}$  355.0922, found 355.0919.

#### 5-(Diphenylphosphoryl)-1-phenylpentan-1-one (3m)

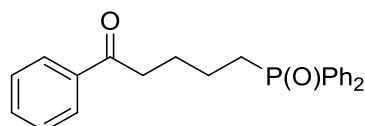

According to the general procedure (GP3) using 1-phenylcyclopentanol **1m** (16.3 mg, 0.1 mmol) and diphenylphosphine oxide **2a** (40.5 mg, 0.2 mmol), compound **3m** was obtained as colorless oil (21.5 mg, 58%).  $^1\text{H}$  NMR (400 MHz,  $\text{CDCl}_3$ ):  $\delta$  7.92–7.88 (m, 2H), 7.77–7.70 (m, 4H), 7.58–7.40 (m, 9H), 2.96 (t,  $J = 7.2$  Hz, 2H), 2.37–2.28 (m, 2H), 1.91–1.81 (m, 2H), 1.79–1.68 (m, 2H);  $^{13}\text{C}$  NMR (100 MHz, DMSO):  $\delta$  199.9, 137.0, 133.6, 133.2, 132.6, 131.9, 131.9, 131.0, 130.9, 128.9, 128.8, 128.7, 128.1, 38.2, 29.9 (d,  $J = 71.8$  Hz), 25.6 (d,  $J = 15.3$  Hz), 21.5 (d,  $J = 3.8$  Hz);  $^{31}\text{P}$  NMR (162 MHz,  $\text{CDCl}_3$ ):  $\delta$  30.2. HRMS (ESI-TOF)  $m/z$ :  $[\text{M}+\text{H}]^+$  Calcd for  $\text{C}_{23}\text{H}_{24}\text{O}_2\text{P}$  363.1514, found 363.1510.

#### 6-(Diphenylphosphoryl)-1-phenylhexan-1-one (3n)

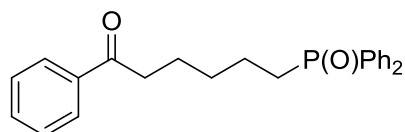

According to the general procedure (GP3) using 1-phenylcyclohexanol **1n** (17.7 mg, 0.1 mmol) and diphenylphosphine oxide **2a** (40.5 mg, 0.2 mmol), compound **3n** was obtained as colorless oil (19.5 mg, 52%).  $^1\text{H}$  NMR (400 MHz,  $\text{CDCl}_3$ ):  $\delta$  7.95–7.89 (m, 2H), 7.78–7.68 (m, 4H), 7.59–7.39 (m, 9H), 2.92 (t,  $J = 7.2$  Hz, 2H), 2.33–2.22 (m, 2H), 1.7–1.62 (m, 4H), 1.56–1.45 (m, 2H);  $^{13}\text{C}$  NMR (100 MHz,  $\text{CDCl}_3$ ):  $\delta$  200.2, 137.1, 133.7, 133.1, 132.7, 131.80, 131.77, 130.9, 130.8, 128.8, 128.70, 128.69, 128.1, 38.2, 30.6 (d,  $J = 14.5$  Hz), 29.7 (d,  $J = 72.1$  Hz), 23.7, 21.4 (d,  $J = 3.8$  Hz);

**<sup>31</sup>P NMR** (162 MHz, CDCl<sub>3</sub>):  $\delta$  32.4. **HRMS (ESI-TOF)**  $m/z$ : [M+H]<sup>+</sup> Calcd for C<sub>24</sub>H<sub>26</sub>O<sub>2</sub>P 377.1670, found 377.1664.

**1,2,3,7b-Tetrahydro-3aH-cyclopenta[3,4]cyclobuta[1,2]benzen-3a-yl diphenylphosphinate (3p')**

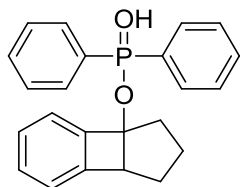

According to the general procedure (**GP3**) using 1,2,3,7b-tetrahydro-3aH-cyclopenta[3,4]-cyclobuta[1,2]benzen-3a-ol **1p'** (16.0 mg, 0.1 mmol) and diphenylphosphine oxide **2a** (40.5 mg, 0.2 mmol), compound **3p'** was obtained as colorless oil (29.9 mg, 83%). **<sup>1</sup>H NMR** (400 MHz, CDCl<sub>3</sub>):  $\delta$  7.83–7.70 (m, 4H), 7.51–7.31 (m, 6H), 7.20 (td,  $J$  = 7.5, 1.0 Hz, 1H), 7.08 (t,  $J$  = 7.5 Hz, 1H), 6.97 (d,  $J$  = 7.3 Hz, 1H), 6.93–6.87 (m, 1H), 3.97 (d,  $J$  = 6.7 Hz, 1H), 2.26 (dd,  $J$  = 12.6, 6.1 Hz, 1H), 2.06–1.96 (m, 1H), 1.85–1.68 (m, 3H), 1.10–0.96 (tt,  $J$  = 12.3, 6.0 Hz, 1H). **<sup>13</sup>C NMR** (101 MHz, CDCl<sub>3</sub>):  $\delta$  144.5 (d,  $J$  = 4.8 Hz), 142.8, 134.1 (d,  $J$  = 12.9 Hz), 132.7 (d,  $J$  = 13.6 Hz), 131.9 (d,  $J$  = 2.9 Hz), 131.8 (d,  $J$  = 2.9 Hz), 131.73, 131.66, 131.62, 131.56, 130.0, 128.5, 128.40, 128.35, 128.3, 127.9, 122.8, 122.5, 93.4 (d,  $J$  = 8.6 Hz), 55.8 (d,  $J$  = 5.2 Hz), 36.7 (d,  $J$  = 3.2 Hz), 28.2, 24.4. **<sup>31</sup>P NMR** (162 MHz, CDCl<sub>3</sub>):  $\delta$  28.2. **HRMS (ESI-TOF)**  $m/z$ : [M+H]<sup>+</sup> Calcd for C<sub>23</sub>H<sub>22</sub>O<sub>2</sub>P 361.1357, found 361.1356.

**2-Phenyl-1H-indene (3q')**

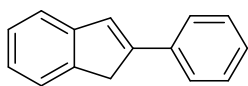

According to the general procedure (**GP3**) using 2-phenyl-2,3-dihydro-1H-inden-2-ol **1q'** (21.0 mg, 0.1 mmol) and diphenylphosphine oxide **2a** (40.5 mg, 0.2 mmol), compound **3q'** was obtained as colorless oil (17.5 mg, 91%).<sup>7</sup> **<sup>1</sup>H NMR** (400 MHz, CDCl<sub>3</sub>):  $\delta$  7.73–7.66 (m, 2H), 7.57–7.51 (m, 1H), 7.49–7.41 (m, 3H), 7.39–7.30 (m, 2H), 7.32–7.21 (m, 2H), 3.85 (s, 2H). **<sup>13</sup>C NMR** (101 MHz, CDCl<sub>3</sub>):  $\delta$  146.5, 145.5, 143.3, 136.1, 128.8, 127.6, 126.8, 126.6, 125.8, 124.9,

123.8, 121.1, 39.1. **HRMS (ESI-TOF)**  $m/z$ :  $[M+H]^+$  Calcd for  $C_{15}H_{13}$  193.1017, found 193.1022.

#### 4-Phenyl-1,2-dihydronaphthalene (3r')

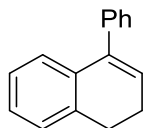

According to the general procedure (**GP3**) using 1-phenyl-1,2,3,4-tetrahydronaphthalen-1-ol **1r'** (22.4 mg, 0.1 mmol) and diphenylphosphine oxide **2a** (40.5 mg, 0.2 mmol), compound **3r'** was obtained as colorless oil (17.5 mg, 85%).<sup>8</sup> **<sup>1</sup>H NMR** (400 MHz,  $CDCl_3$ ):  $\delta$  7.39–7.24 (m, 5H), 7.20–7.04 (m, 3H), 7.00 (d,  $J = 7.7$  Hz, 1H), 6.06 (t,  $J = 4.8$  Hz, 1H), 2.82 (t,  $J = 8.0$  Hz, 2H), 2.42–2.33 (m, 2H). **<sup>13</sup>C NMR** (101 MHz,  $CDCl_3$ ):  $\delta$  141.1, 140.2, 137.1, 135.4, 129.1, 128.5, 127.93, 127.9, 127.4, 127.3, 126.5, 125.8, 28.6, 23.9. **HRMS (ESI-TOF)**  $m/z$ :  $[M+H]^+$  Calcd for  $C_{16}H_{15}$  207.1174, found 207.1176.

#### 1-Phenylcyclohept-1-ene (3s')

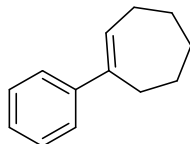

According to the general procedure (**GP3**) using 1-phenylcycloheptan-1-ol **1s'** (19.0 mg, 0.1 mmol) and diphenylphosphine oxide **2a** (40.5 mg, 0.2 mmol), compound **3s'** was obtained as colorless oil (15.3 mg, 89%).<sup>5</sup> **<sup>1</sup>H NMR** (400 MHz,  $CDCl_3$ ):  $\delta$  7.27–7.18 (m, 4H), 7.15–7.08 (m, 1H), 6.02 (t,  $J = 6.8$  Hz, 1H), 2.58–2.51 (m, 2H), 2.29–2.17 (m, 2H), 1.82–1.72 (m, 2H), 1.63–1.53 (m, 2H), 1.53–1.44 (m, 2H). **<sup>13</sup>C NMR** (101 MHz,  $CDCl_3$ ):  $\delta$  145.1 (d,  $J = 2.7$  Hz), 130.5, 128.2, 126.4, 125.8, 32.9, 29.0, 27.1, 27.0. **HRMS (ESI-TOF)**  $m/z$ :  $[M+H]^+$  Calcd for  $C_{13}H_{17}$  173.1330, found 173.1327.

#### 1-Phenylcyclododec-1-ene (3t')

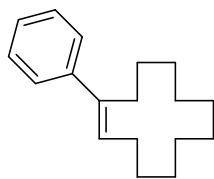

According to the general procedure (**GP3**) using 1-phenylcyclododecan-1-ol **1t'** (26.0 mg, 0.1 mmol) and diphenylphosphine oxide **2a** (40.5 mg, 0.2 mmol), compound **3t'** was obtained as colorless oil (22.3 mg, 92%).<sup>6</sup> **<sup>1</sup>H NMR** (400 MHz, CDCl<sub>3</sub>):  $\delta$  7.36 – 7.27 (m, 4H), 7.24 – 7.15 (m, 1H), 5.58 (t,  $J$  = 7.8 Hz, 1H), 2.59 (t,  $J$  = 6.8 Hz, 2H), 2.26 (q,  $J$  = 7.1 Hz, 2H), 1.60 – 1.52 (m, 2H), 1.46 – 1.30 (m, 12H), 1.22 – 1.15 (m, 2H). **<sup>13</sup>C NMR** (101 MHz, CDCl<sub>3</sub>):  $\delta$  143.6, 140.5, 130.5, 128.2, 126.9, 126.5, 29.8, 27.5, 25.7, 25.6, 25.5, 25.0, 24.9, 24.5, 24.4, 22.6, 22.6. **HRMS (ESI-TOF)**  $m/z$ : [M+Na]<sup>+</sup> Calcd for C<sub>18</sub>H<sub>26</sub>Na 265.1932, found 265.1933.

#### 4-(Di-*p*-tolylphosphoryl)-1-phenylbutan-1-one (4a)

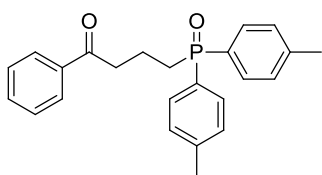

According to the general procedure (**GP3**) using 1-phenylcyclobutanol **1a** (14.9 mg, 0.1 mmol) and di-*p*-tolylphosphine oxide **2b** (46.2 mg, 0.2 mmol), compound **4a** was obtained as colorless oil (29.3 mg, 78%). **<sup>1</sup>H NMR** (400 MHz, CDCl<sub>3</sub>):  $\delta$  7.90 (d,  $J$  = 7.1 Hz, 2H), 7.64 (dd,  $J$  = 11.3, 7.8 Hz, 4H), 7.54 (t,  $J$  = 7.5 Hz, 1H), 7.43 (t,  $J$  = 7.6 Hz, 2H), 7.27–7.23 (m, 4H), 3.14 (t,  $J$  = 6.6 Hz, 2H), 2.41–2.32 (m, 8H), 2.16–2.02 (m, 2H). **<sup>13</sup>C NMR** (100 MHz, CDCl<sub>3</sub>):  $\delta$  199.6, 142.2, 142.2, 136.9, 133.2, 131.0, 130.9, 130.6, 129.6, 129.5, 128.7, 128.1, 38.8 (d,  $J$  = 11.8 Hz), 29.2 (d,  $J$  = 71.9 Hz), 21.7, 16.8 (d,  $J$  = 3.4 Hz). **<sup>31</sup>P NMR** (162 MHz, CDCl<sub>3</sub>):  $\delta$  32.9. **HRMS (ESI-TOF)**  $m/z$ : [M+Na]<sup>+</sup> Calcd for C<sub>24</sub>H<sub>25</sub>NaO<sub>2</sub>P 399.1490, found 399.1495.

#### 4-(Di-*o*-tolylphosphoryl)-1-phenylbutan-1-one (4b)



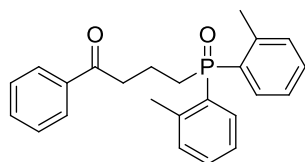

According to the general procedure (**GP3**) using 1-phenylcyclobutanol **1a** (14.9 mg, 0.1 mmol) and di-*o*-tolylphosphine oxide **2c** (46.2 mg, 0.2 mmol), compound **4b** was obtained as colorless oil (27.1 mg, 72%). **<sup>1</sup>H NMR** (400 MHz, CDCl<sub>3</sub>):  $\delta$  7.92 (d,  $J$  = 7.4 Hz, 2H), 7.84–7.75 (m, 2H), 7.54 (t,  $J$  = 7.3 Hz, 1H), 7.47–7.34 (m, 4H), 7.31–7.24 (m, 2H), 7.20–7.14 (m, 2H), 3.17 (t,  $J$  = 6.4 Hz, 2H), 2.55–2.44 (m, 2H), 2.31 (s, 6H), 2.16–2.03 (m, 2H); **<sup>13</sup>C NMR** (100 MHz, CDCl<sub>3</sub>):  $\delta$  199.6, 141.7, 141.6, 136.9, 133.3, 132.2, 132.1, 132.0, 131.9, 128.7, 128.1, 125.9, 125.7, 38.9 (d,  $J$  = 12.4 Hz), 28.3 (d,  $J$  = 71.8 Hz), 21.3 (d,  $J$  = 4.2 Hz), 16.8; **<sup>31</sup>P NMR** (162 MHz, CDCl<sub>3</sub>):  $\delta$  34.5. **HRMS (ESI-TOF)**  $m/z$ : [M+H]<sup>+</sup> Calcd for C<sub>24</sub>H<sub>26</sub>O<sub>2</sub>P 377.1670, found 377.1668.

#### 4-((4-Methoxyphenyl)(phenyl)phosphoryl)-1-phenylbutan-1-one (**4c**)

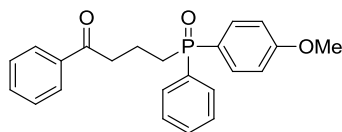

According to the general procedure (**GP3**) using 1-phenylcyclobutanol **1a** (14.9 mg, 0.1 mmol) and (4-methoxyphenyl)(phenyl)phosphine oxide **2d** (46.6 mg, 0.2 mmol), compound **4c** was obtained as colorless oil (23.8 mg, 63%). **<sup>1</sup>H NMR** (400 MHz, CDCl<sub>3</sub>):  $\delta$  7.92–7.87 (m, 2H), 7.79–7.65 (m, 4H), 7.54 (t,  $J$  = 7.4 Hz, 1H), 7.50–7.39 (m, 5H), 6.95 (dd,  $J$  = 8.8, 2.0 Hz, 2H), 3.81 (s, 3H), 3.13 (t,  $J$  = 6.6 Hz, 2H), 2.42–2.32 (m, 2H), 2.14–2.01 (m, 2H); **<sup>13</sup>C NMR** (100 MHz, CDCl<sub>3</sub>):  $\delta$  199.6, 162.5, 136.8, 133.3, 132.9, 132.8, 131.7, 130.9, 130.8, 128.8, 128.7, 128.1, 114.5, 114.3, 55.4, 38.8 (d,  $J$  = 12.5 Hz), 29.2 (d,  $J$  = 72.5 Hz), 16.7 (d,  $J$  = 2.9 Hz); **<sup>31</sup>P NMR** (162 MHz, CDCl<sub>3</sub>):  $\delta$  32.7. **HRMS (ESI-TOF)**  $m/z$ : [M+Na]<sup>+</sup> Calcd for C<sub>23</sub>H<sub>23</sub>NaO<sub>3</sub>P 401.1283, found 401.1280.

#### 4-(Bis(4-methoxyphenyl)phosphoryl)-1-phenylbutan-1-one (**4d**)

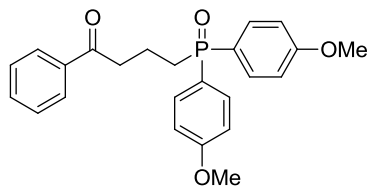

According to the general procedure (**GP3**) using 1-phenylcyclobutanol **1a** (14.9 mg, 0.1 mmol) and bis(4-methoxyphenyl)phosphine oxide **2e** (52.6 mg, 0.2 mmol), compound **4d** was obtained as colorless oil (22.4 mg, 55%). **<sup>1</sup>H NMR** (400 MHz, CDCl<sub>3</sub>):  $\delta$  7.90 (d,  $J$  = 7.5 Hz, 2H), 7.67 (t,  $J$  = 9.3 Hz, 4H), 7.54 (t,  $J$  = 7.4 Hz, 1H), 7.43 (t,  $J$  = 7.6 Hz, 2H), 6.95 (d,  $J$  = 7.6 Hz, 4H), 3.82 (s, 6H) 3.14 (t,  $J$  = 6.3 Hz, 2H), 2.40–2.28 (m, 2H), 2.15–2.04 (m, 2H); **<sup>13</sup>C NMR** (100 MHz, DMSO):  $\delta$  199.5, 161.7, 136.5, 133.2, 132.3, 132.2, 128.7, 127.8, 125.8, 124.8, 114.3, 114.2, 55.3, 38.4 (d,  $J$  = 13.0 Hz), 28.2 (d,  $J$  = 72.6 Hz), 16.5 (d,  $J$  = 3.1 Hz); **<sup>31</sup>P NMR** (162 MHz, CDCl<sub>3</sub>):  $\delta$  30.1. **HRMS (ESI-TOF)**  $m/z$ : [M+Na]<sup>+</sup> Calcd for C<sub>24</sub>H<sub>25</sub>NaO<sub>4</sub>P 431.1388, found 431.1388.

#### 4-((4-Fluorophenyl)(phenyl)phosphoryl)-1-phenylbutan-1-one (**4e**)

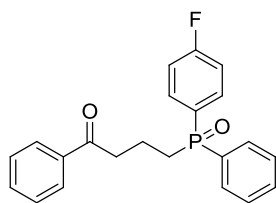

According to the general procedure (**GP3**) using 1-phenylcyclobutanol **1a** (14.9 mg, 0.1 mmol) and (4-fluorophenyl)(phenyl)phosphine oxide **2f** (44.1 mg, 0.2 mmol), compound **4e** was obtained as colorless oil (17.9 mg, 49%). **<sup>1</sup>H NMR** (400 MHz, CDCl<sub>3</sub>):  $\delta$  7.93–7.88 (m, 2H), 7.82–7.72 (m, 4H), 7.58–7.41 (m, 6H), 7.15 (td,  $J$  = 8.7, 2.0 Hz, 2H), 3.16 (t,  $J$  = 6.5 Hz, 2H), 2.44–2.34 (m, 2H), 2.15–2.04 (m, 2H). **<sup>13</sup>C NMR** (100 MHz, CDCl<sub>3</sub>):  $\delta$  199.4, 163.8 (d,  $J$  = 3.1 Hz), 136.8, 133.6–133.3 (m), 132.0, 132.0, 130.9, 130.8, 129.0, 128.9, 128.8, 128.1, 116.4, 116.24, 116.16, 116.0, 38.7 (d,  $J$  = 12.4 Hz), 29.1 (d,  $J$  = 72.4 Hz), 16.6 (d,  $J$  = 3.4 Hz). **<sup>31</sup>P NMR** (162 MHz, CDCl<sub>3</sub>):  $\delta$  32.2. **HRMS (ESI-TOF)**  $m/z$ : [M+H]<sup>+</sup> Calcd for C<sub>22</sub>H<sub>21</sub>FO<sub>2</sub>P 367.1263, found 367.1259.

#### 4-(Bis(4-chlorophenyl)phosphoryl)-1-phenylbutan-1-one (**4f**)

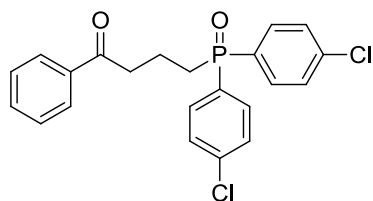

According to the general procedure (**GP3**) using 1-phenylcyclobutanol **1a** (14.9 mg, 0.1 mmol) and bis(4-chlorophenyl)phosphine oxide **2g** (54.0 mg, 0.2 mmol), compound **4f** was obtained as colorless oil (32.9 mg, 79%). **<sup>1</sup>H NMR** (400 MHz, CDCl<sub>3</sub>):  $\delta$  7.94–7.86 (m, 2H), 7.69 (dd,  $J$  = 10.9, 8.2 Hz, 4H), 7.60–7.52 (m, 1H), 7.49–7.41 (m, 6H), 3.15 (t,  $J$  = 6.4 Hz, 2H), 2.45–2.31 (m, 2H), 2.17–2.00 (m, 2H). **<sup>13</sup>C NMR** (100 MHz, CDCl<sub>3</sub>):  $\delta$  199.3, 138.8, 138.7, 136.7, 133.4, 132.3, 132.2, 131.8, 130.8, 129.4, 129.3, 128.8, 128.1, 38.5 (d,  $J$  = 12.7 Hz), 28.8 (d,  $J$  = 72.8 Hz), 16.5 (d,  $J$  = 3.5 Hz). **<sup>31</sup>P NMR** (162 MHz, CDCl<sub>3</sub>):  $\delta$  31.6. **HRMS (ESI-TOF)  $m/z$** : [M+H]<sup>+</sup> Calcd for C<sub>22</sub>H<sub>20</sub>Cl<sub>2</sub>O<sub>2</sub>P 417.0578, found 417.0579.

#### 4-(Di(thiophen-2-yl)phosphoryl)-1-phenylbutan-1-one (**4g**)

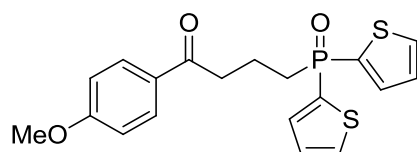

According to the general procedure (**GP3**) using 1-phenylcyclobutanol **1a** (14.9 mg, 0.1 mmol) and bis(4-chlorophenyl)phosphine oxide **2h** (54.0 mg, 0.2 mmol), compound **4g** was obtained as colorless oil (20.7 mg, 53%). **<sup>1</sup>H NMR** (400 MHz, CDCl<sub>3</sub>):  $\delta$  7.95–7.87 (m, 2H), 7.74–7.67 (m, 2H), 7.67–7.59 (m, 2H), 7.22–7.15 (m, 2H), 6.95–6.87 (m, 2H), 3.86 (s, 3H), 3.12 (t,  $J$  = 6.7 Hz, 2H), 2.48–2.36 (m, 2H), 2.22–2.08 (m, 2H); **<sup>13</sup>C NMR** (100 MHz, CDCl<sub>3</sub>):  $\delta$  197.8, 163.7, 135.6, 135.5, 133.6, 133.5, 133.4, 130.4, 129.9, 128.6, 128.4, 113.9, 55.6, 38.3 (d,  $J$  = 12.9 Hz), 33.3 (d,  $J$  = 79.8 Hz), 17.0 (d,  $J$  = 3.7 Hz); **<sup>31</sup>P NMR** (162 MHz, CDCl<sub>3</sub>):  $\delta$  22.5. **HRMS (ESI-TOF)  $m/z$** : [M+Na]<sup>+</sup> Calcd for C<sub>19</sub>H<sub>19</sub>NaO<sub>3</sub>PS<sub>2</sub> 413.0411, found 413.0409.

#### 1-Phenyl-4-(phenyl(thiophen-2-yl)phosphoryl)butan-1-one (**4h**)

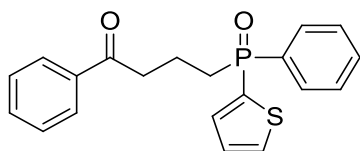

According to the general procedure (**GP3**) using 1-phenylcyclobutanol **1a** (14.9 mg, 0.1 mmol) and phenyl(thiophen-2-yl)phosphine oxide **2i** (41.7 mg, 0.2 mmol), compound **4h** was obtained as colorless oil (21.9 mg, 62%). **<sup>1</sup>H NMR** (400 MHz, DMSO-*d*<sub>6</sub>): δ 8.03–7.99 (m, 1H), 7.93–7.89 (m, 2H), 7.84–7.76 (m, 2H), 7.68–7.64 (m, 1H), 7.61 (dt, *J* = 2.6, 1.6 Hz, 1H), 7.58–7.48 (m, 5H), 7.29–7.26 (m, 1H), 3.19 (t, *J* = 7.1 Hz, 2H), 2.48–2.38 (m, 2H), 1.91–1.72 (m, 2H); **<sup>13</sup>C NMR** (101 MHz, DMSO-*d*<sub>6</sub>): δ 199.4, 136.5, 135.5, 134.7, 134.6, 133.8 (d, *J* = 4.4 Hz), 131.8 (d, *J* = 2.7 Hz), 130.3, 130.2, 128.8, 128.71, 128.67, 127.8, 38.3 (d, *J* = 13.8 Hz), 29.8 (d, *J* = 74.8 Hz), 16.4 (d, *J* = 3.3 Hz). **<sup>31</sup>P NMR** (162 MHz, CDCl<sub>3</sub>): δ 27.9. **HRMS (ESI-TOF)** *m/z*: [M+Na]<sup>+</sup> Calcd for C<sub>20</sub>H<sub>19</sub>NaO<sub>2</sub>PS 377.0741, found 377.0744.

#### 4-(Di(naphthalen-1-yl)phosphoryl)-1-phenylbutan-1-one (**4i**)

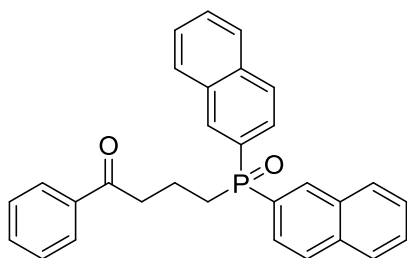

According to the general procedure (**GP3**) using 1-phenylcyclobutanol **1a** (14.9 mg, 0.1 mmol) and di(naphthalen-1-yl)phosphine oxide **2j** (60.6 mg, 0.2 mmol), compound **4i** was obtained as colorless oil (28.7 mg, 68%). **<sup>1</sup>H NMR** (400 MHz, CDCl<sub>3</sub>): δ 8.47 (dd, *J* = 13.2, 1.5 Hz, 2H), 7.97–7.82 (m, 8H), 7.78–7.70 (m, 2H), 7.61–7.48 (m, 5H), 7.44–7.35 (m, 2H), 3.19 (t, *J* = 6.6 Hz, 2H), 2.66–2.55 (m, 2H), 2.27–2.12 (m, 2H). **<sup>13</sup>C NMR** (100 MHz, CDCl<sub>3</sub>): δ 199.5, 136.8, 134.8, 133.3, 132.9, 132.8, 132.7, 130.7, 129.7, 129.0, 128.8, 128.7, 128.2, 128.1, 128.0, 127.1, 125.8, 125.7, 38.7 (d, *J* = 12.5 Hz), 28.8 (d, *J* = 72.1 Hz), 16.8. **<sup>31</sup>P NMR** (162 MHz, CDCl<sub>3</sub>): δ 33.0. **HRMS (ESI-TOF)** *m/z*: [M+H]<sup>+</sup> Calcd for C<sub>30</sub>H<sub>26</sub>O<sub>2</sub>P 449.1670, found 449.1666.

#### Detection of Radical Intermediates

### 3-((Diphenylphosphoryl)methyl)-1,3-dimethylindolin-2-one (7)

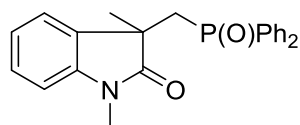

To a Schlenk tube was successively added diphenylphosphine oxide **2a** (40.4 mg, 0.2 mmol), *N*-methyl-*N*-phenylmethacrylamide **6** (35.4 mg, 0.2 mmol), Ag<sub>2</sub>SO<sub>4</sub> (6.2 mg, 0.02 mmol), (NH<sub>4</sub>)<sub>2</sub>S<sub>2</sub>O<sub>8</sub> (68.5 mg, 0.3 mmol) and toluene (1 mL). The tube was sealed and then backfilled thrice with argon. The reaction mixture was stirred at 90 °C for 12 hours, and then allowed to cool to room temperature. Afterwards, the reaction mixture was cooled to room temperature, diluted with ethyl acetate, and filtered. The filtrate was concentrated under vacuum, and the residue was purified by column chromatography on silica gel (acetone/petroleum ether = 1.86:1) to afford compound **7** as colorless oil (31.4 mg, 42%). <sup>1</sup>H NMR (400 MHz, CDCl<sub>3</sub>): δ 7.58–7.51 (m, 2H), 7.50–7.44 (m, 2H), 7.43–7.27 (m, 6H), 7.17–7.10 (m, 2H), 6.76 (td, *J* = 7.6, 0.8 Hz, 1H), 6.66 (d, *J* = 7.7 Hz, 1H), 3.07 (dd, *J* = 15.2, 10.3 Hz, 1H), 3.00 (s, 3H), 2.84 (dd, *J* = 15.2, 10.7 Hz, 1H), 1.41 (d, *J* = 1.7 Hz, 3H). <sup>13</sup>C NMR (100 MHz, CDCl<sub>3</sub>): δ 179.6 (d, *J* = 4.0 Hz), 143.1, 134.3, 133.6, 133.3, 132.6, 131.5 (d, *J* = 2.7 Hz), 131.3 (d, *J* = 2.5 Hz), 130.8 (d, *J* = 9.4 Hz), 130.6 (d, *J* = 9.0 Hz), 128.5, 128.4, 128.3, 128.2, 128.0, 124.9, 122.3, 107.9, 45.6 (d, *J* = 3.8 Hz), 37.6 (d, *J* = 71.4 Hz), 27.0 (d, *J* = 11.9 Hz), 26.4; <sup>31</sup>P NMR (162 MHz, CDCl<sub>3</sub>): δ 26.0. HRMS (ESI-TOF) *m/z*: [M+H]<sup>+</sup> Calcd for C<sub>23</sub>H<sub>23</sub>NO<sub>2</sub>P 376.1466, found 376.1470.

### 1,3-Dimethyl-3-(5-oxo-5-phenylpentyl)indolin-2-one (8)

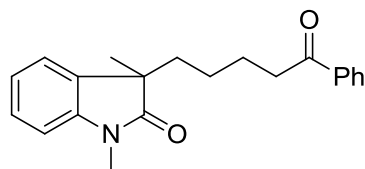

To a Schlenk tube was successively added 1-phenylcyclobutanol **1a** (14.9 mg, 0.1 mmol), *N*-methyl-*N*-phenylmethacrylamide **6** (35.4 mg, 0.2 mmol), Ag<sub>2</sub>SO<sub>4</sub> (6.2 mg, 0.02 mmol), (NH<sub>4</sub>)<sub>2</sub>S<sub>2</sub>O<sub>8</sub> (68.5 mg, 0.3 mmol) and toluene (1 mL). The tube was sealed and then backfilled

thrice with argon. The reaction mixture was stirred at 90 °C for 12 hours, and then allowed to cool to room temperature. Afterwards, the reaction mixture was cooled to room temperature, diluted with ethyl acetate, and filtered. The filtrate was concentrated under vacuum, and the residue was purified by column chromatography on silica gel (ethyl acetate/petroleum ether = 10:1) to afford compound **8** as colorless oil (10.3 mg, 32%). **<sup>1</sup>H NMR** (400 MHz, CDCl<sub>3</sub>): δ 7.92–7.87 (m, 2H), 7.55–7.50 (m, 1H), 7.47–7.40 (m, 2H), 7.30–7.23 (m, 1H), 7.17 (d, *J* = 7.3 Hz, 1H), 7.07 (t, *J* = 7.5 Hz, 1H), 6.84 (d, *J* = 7.7 Hz, 1H), 3.21 (s, 3H), 2.93–2.75 (m, 2H), 2.02–1.91 (m, 1H), 1.84–1.72 (m, 1H), 1.68–1.54 (m, 2H), 1.26 (s, 3H), 1.12–1.03 (m, 1H), 1.01–0.93 (m, 1H); **<sup>13</sup>C NMR** (100 MHz, CDCl<sub>3</sub>): δ 200.2, 180.8, 143.4, 137.0, 134.2, 133.0, 128.7, 128.1, 127.8, 122.7, 122.6, 108.1, 48.5, 38.43, 38.37, 26.3, 24.40, 24.38, 24.0. **HRMS (ESI-TOF)** *m/z*: [M+H]<sup>+</sup> Calcd for C<sub>21</sub>H<sub>24</sub>NO<sub>2</sub> 322.1807, found 322.1812.

## 7. References

1. Peng, P.; Peng, L.; Wang, G.-Y.; Wang, F.-Y.; Luo, Y.; Lei, A.-W. Visible Light Mediated Aerobic Radical C–H Phosphorization toward Arylphosphonates. *Org. Chem. Front.* **2016**, *3*, 749-752.
2. Hatano, M.; Mizuno, T.; Ishihara, K. Catalytic Enantioselective Synthesis of Sterically Demanding Alcohols using Di(21-alkyl)zinc Prepared by the Refined Charette's Method. *Chem. Commun.* **2010**, *46*, 5443-5445.
3. Xu, Q.; Zhao, C.-Q.; Han, L.-B. Stereospecific Nucleophilic Substitution of Optically Pure *H*-Phosphinates: A General Way for the Preparation of Chiral P-Stereogenic Phosphine Oxides. *J. Am. Chem. Soc.* **2008**, *130*, 12648-12655.
4. Jablonkai, E.; Keglevich G. Catalyst-Free P–C Coupling Reactions of Halobenzoic Acids and Secondary Phosphine Oxides under Microwave Irradiation in Water. *Tetrahedron Lett.* **2015**, *56*, 1638-1640.
5. Olsson, V. J.; Szabó, K. J. Functionalization of Unactivated Alkenes through Iridium-Catalyzed Borylation of Carbon-Hydrogen Bonds. Mechanism and Synthetic Applications. *J. Org. Chem.* **2009**, *74*, 7715-7723.
6. Huang, L.-F.; Huang, C.-H.; Stulgies, B.; Meijere, A.; Luh, T.-Y. Nickel-Catalyzed Olefination of Unactivated Aliphatic Dithioacetals. *Org. Lett.* **2003**, *5*, 4489-4491.
7. Usanov, D. L.; Yamamoto, H. Nickel-Catalyzed Olefination of Unactivated Aliphatic Dithioacetals. *Org. Lett.* **2012**, *14*, 414-417.
8. Xu, L.; Li, B.-J.; Wu, Z.-H.; Lu, X.-Y.; Guan, B.-T.; Wang, B.-Q.; Zhao, K.-Q.; Shi, Z.-J. Nickel-Catalyzed Efficient and Practical Suzuki-Miyaura Coupling of Alkenyl and Aryl Carbamates with Aryl Boroxines. *Org. Lett.* **2010**, *12*, 884-887.

## 8. $^1\text{H}$ , $^{13}\text{C}$ and $^{31}\text{P}$ NMR Spectra of Products 3, 4, 7 and 8

### 3a

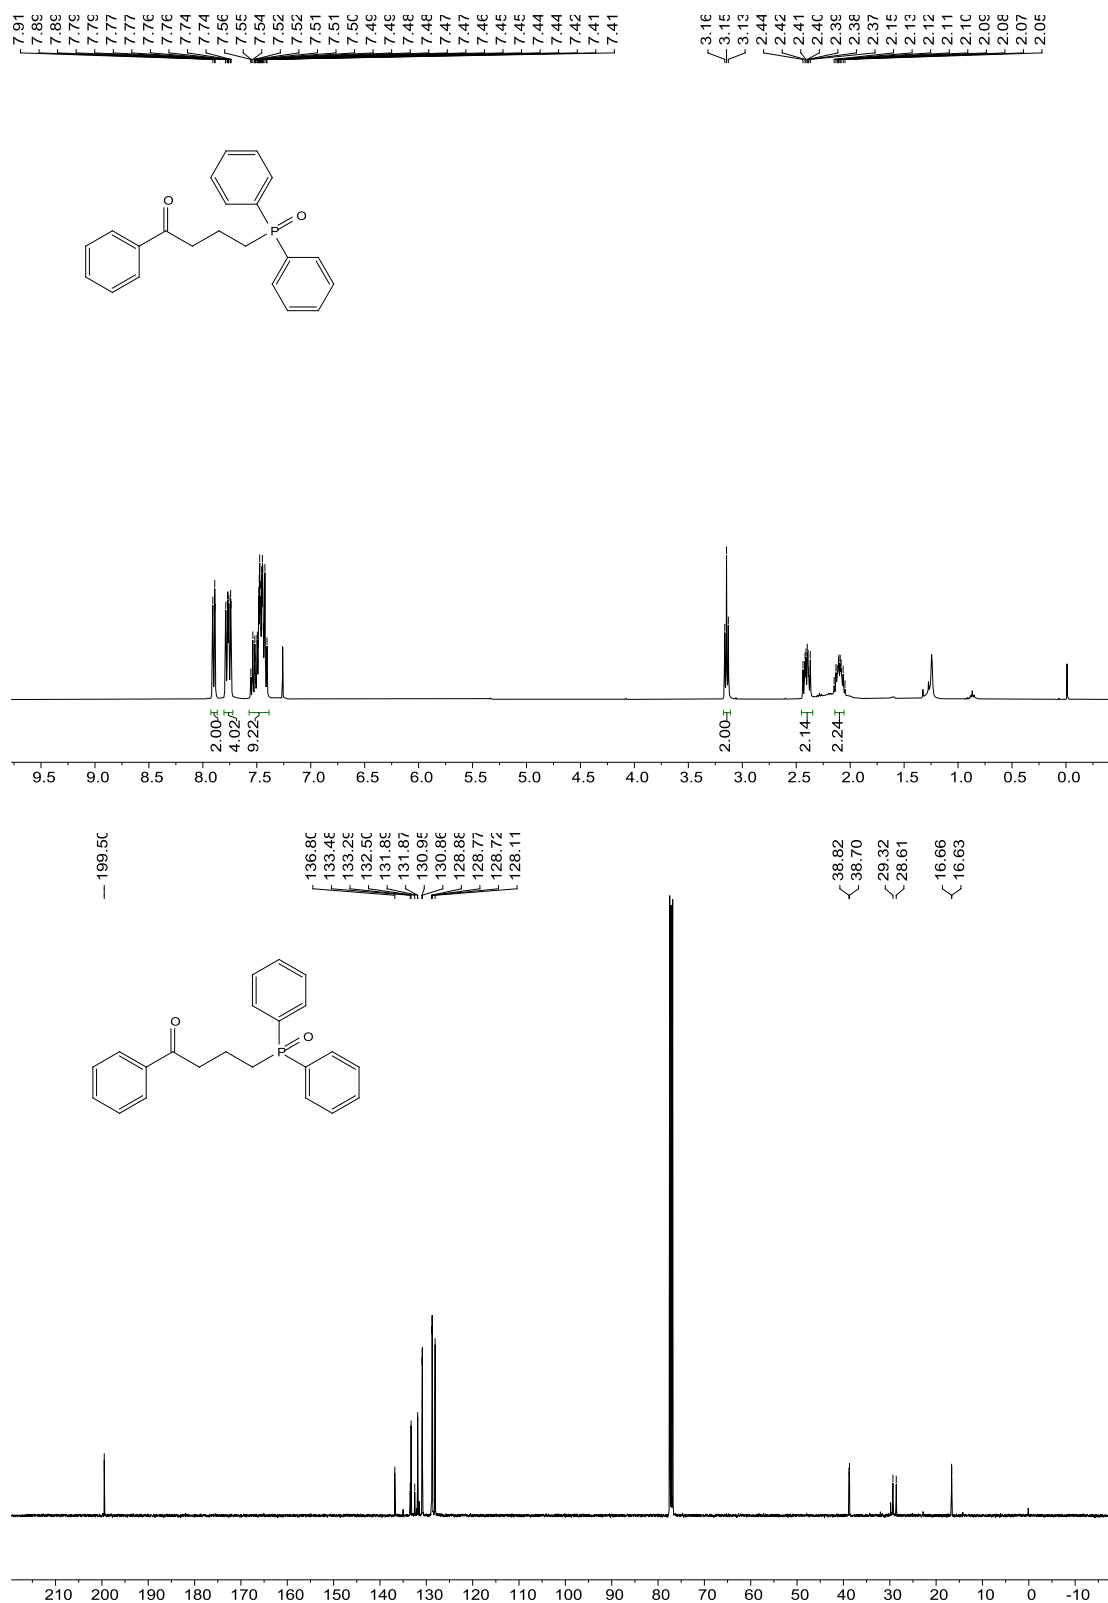



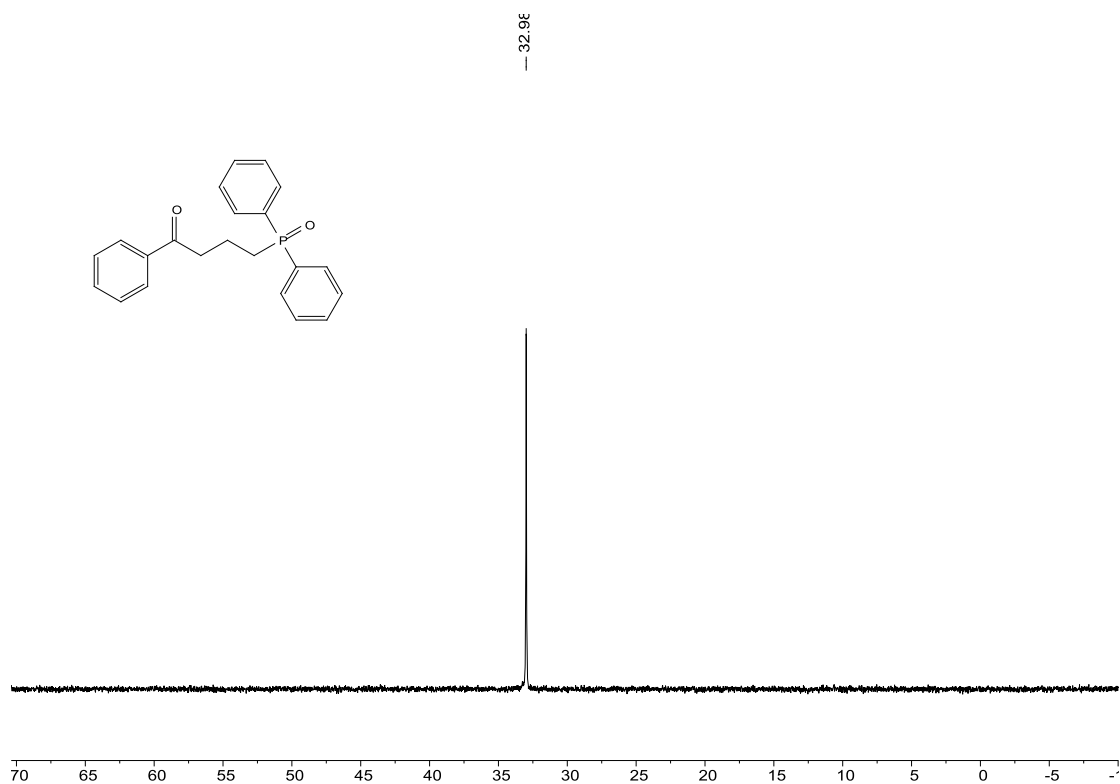

**3b**

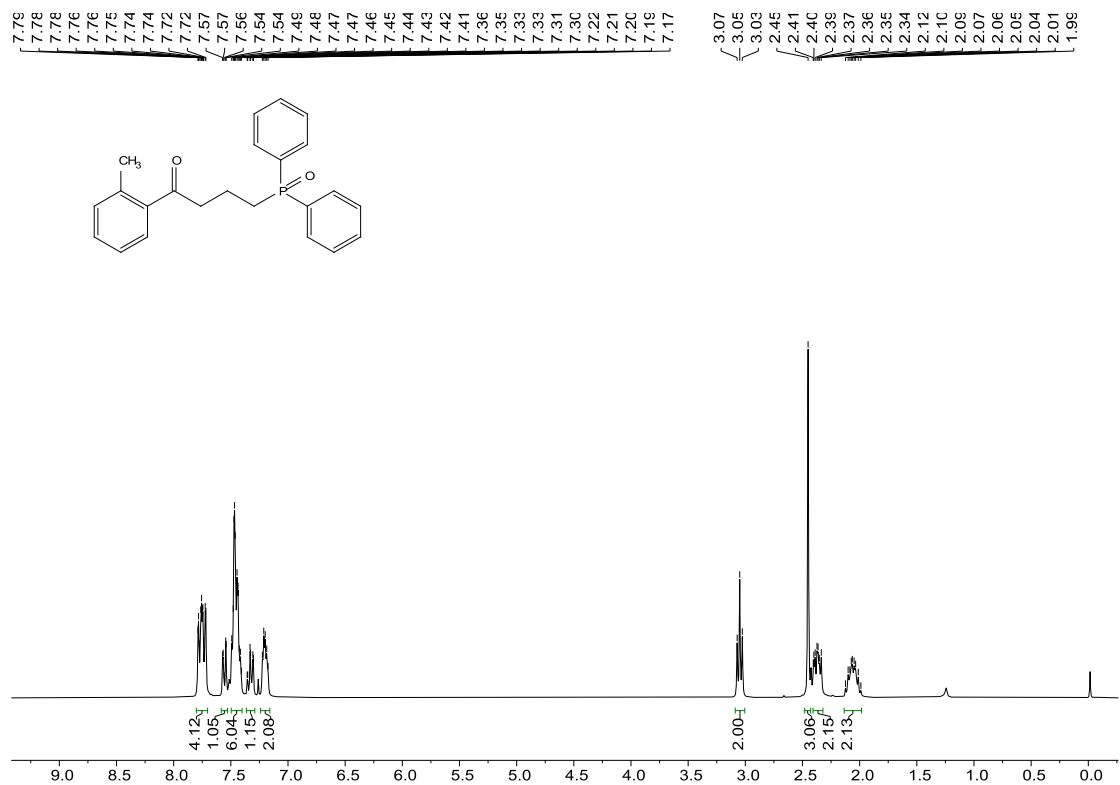

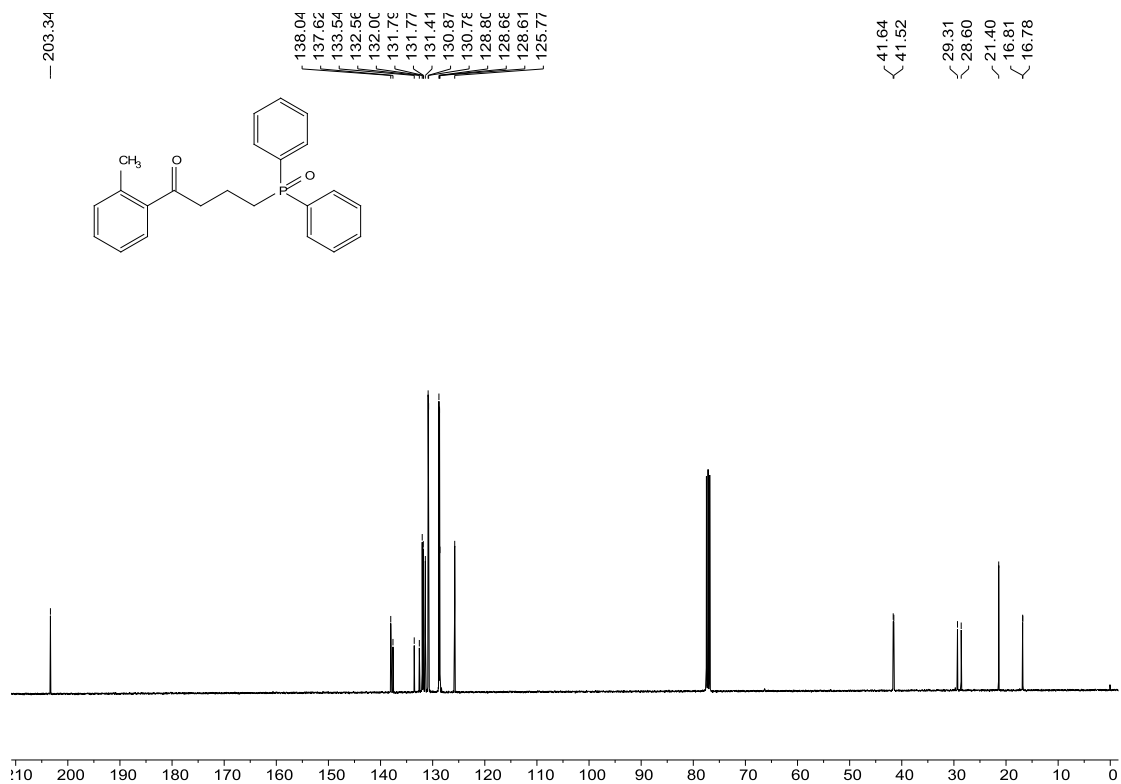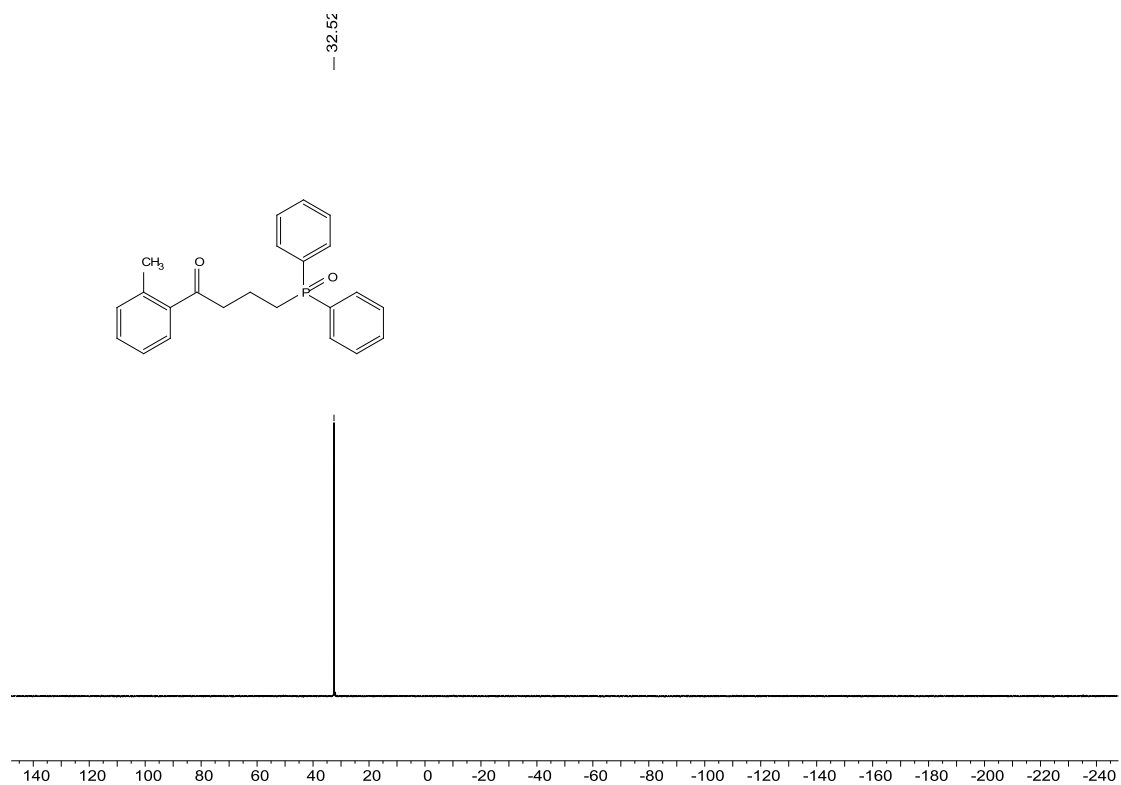

3c

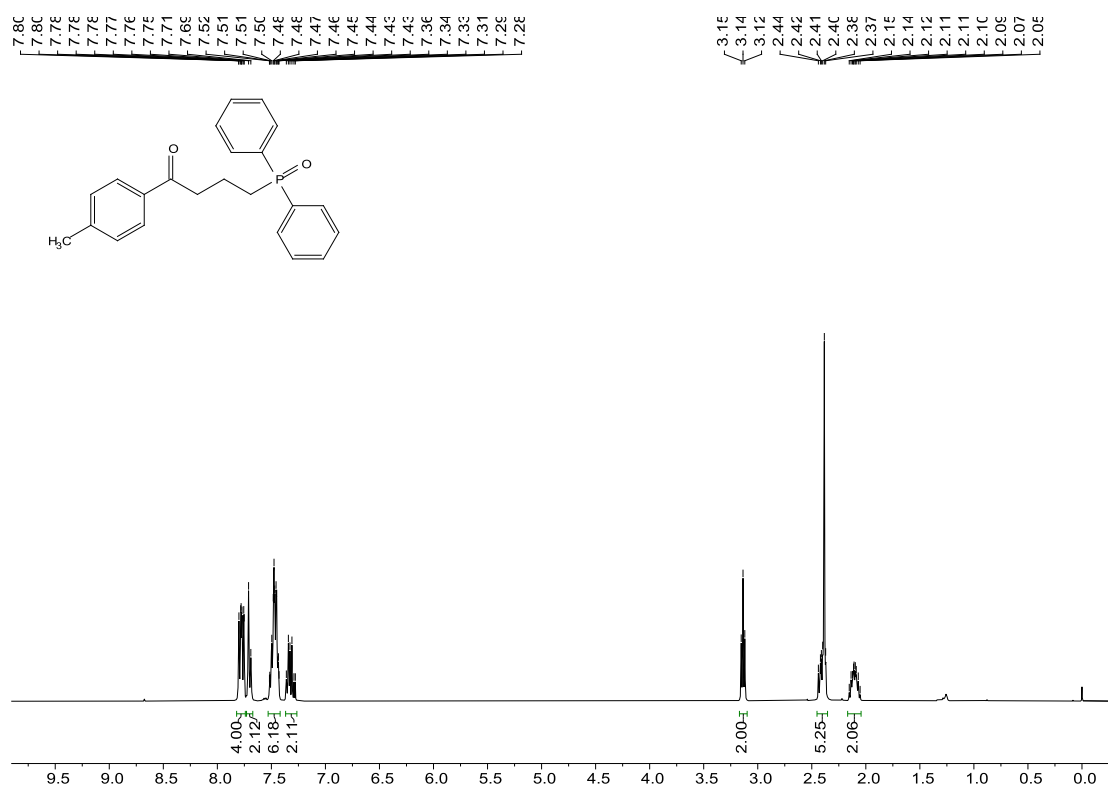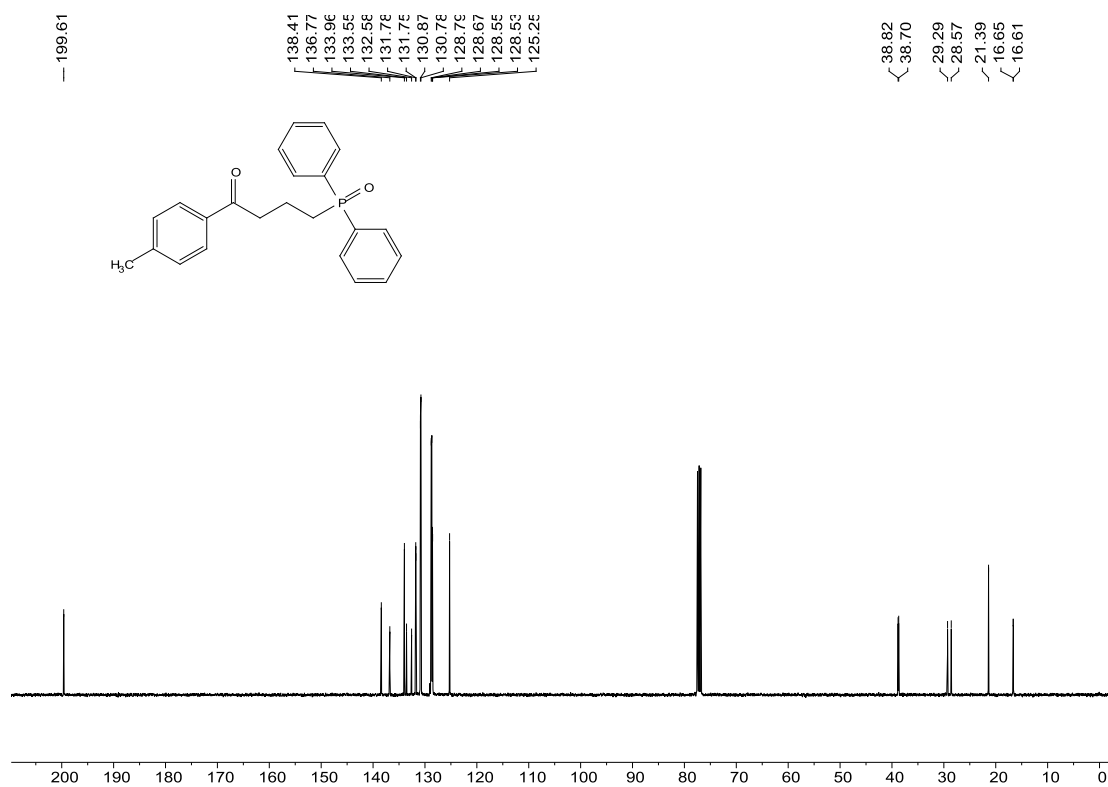

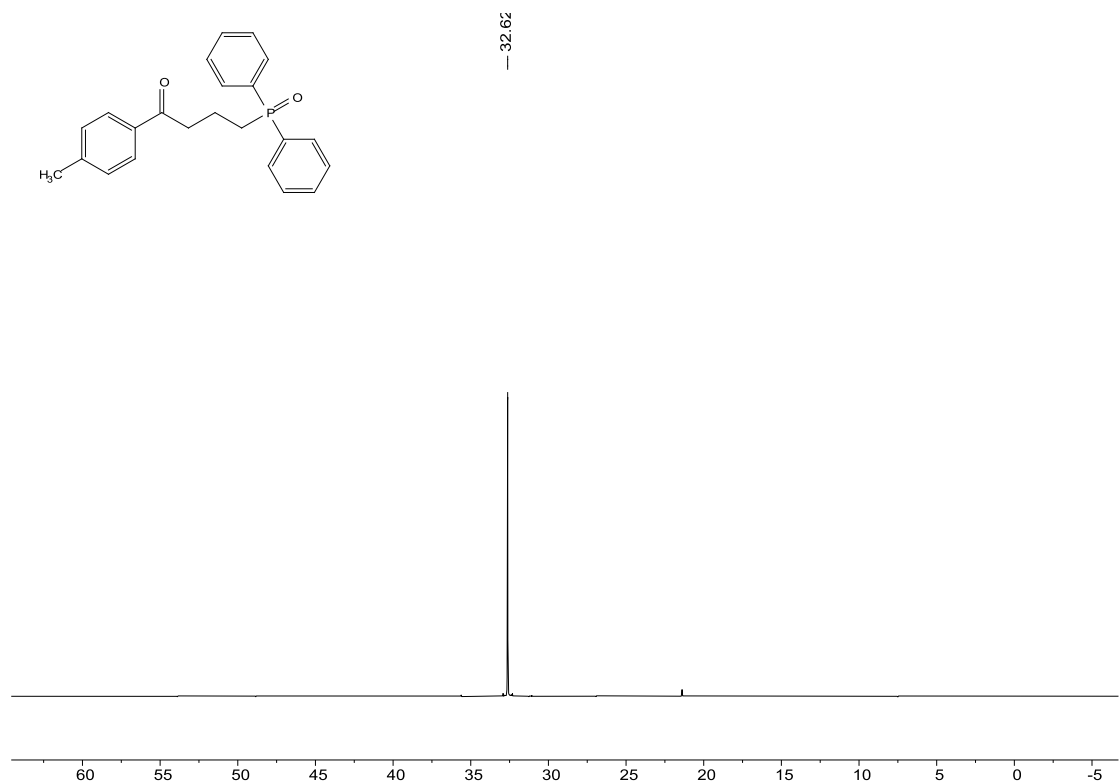

**3d**

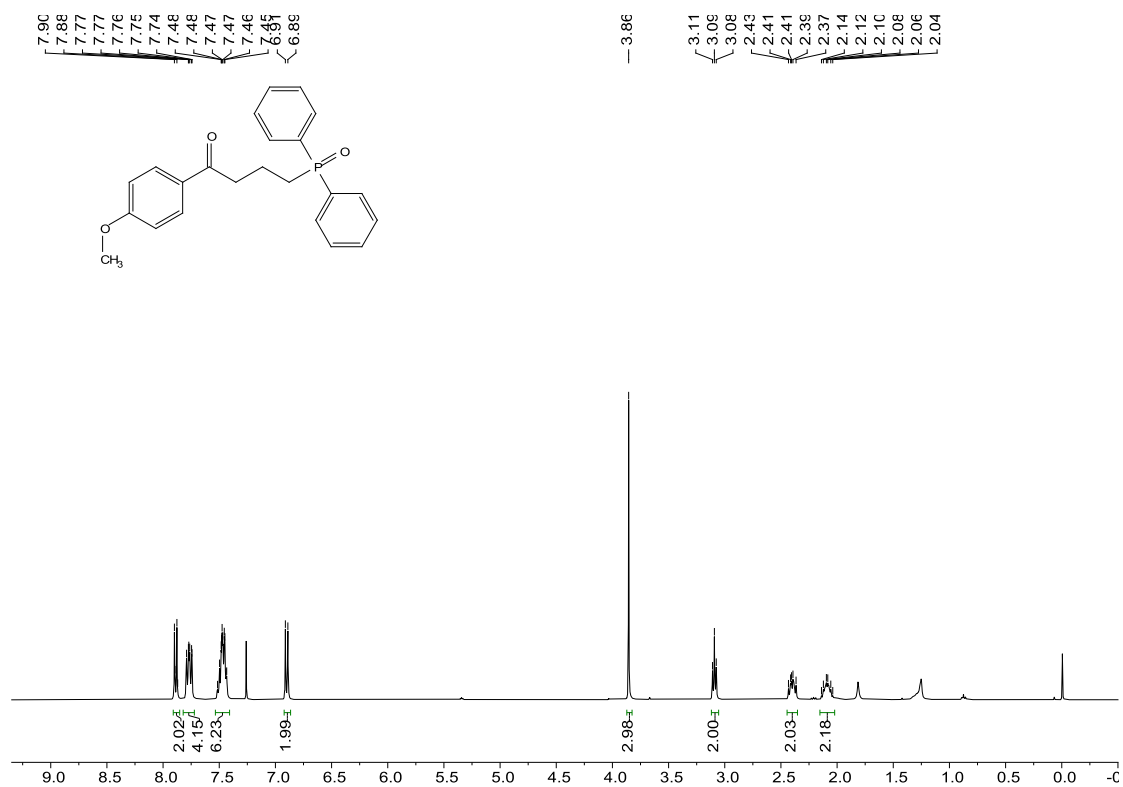

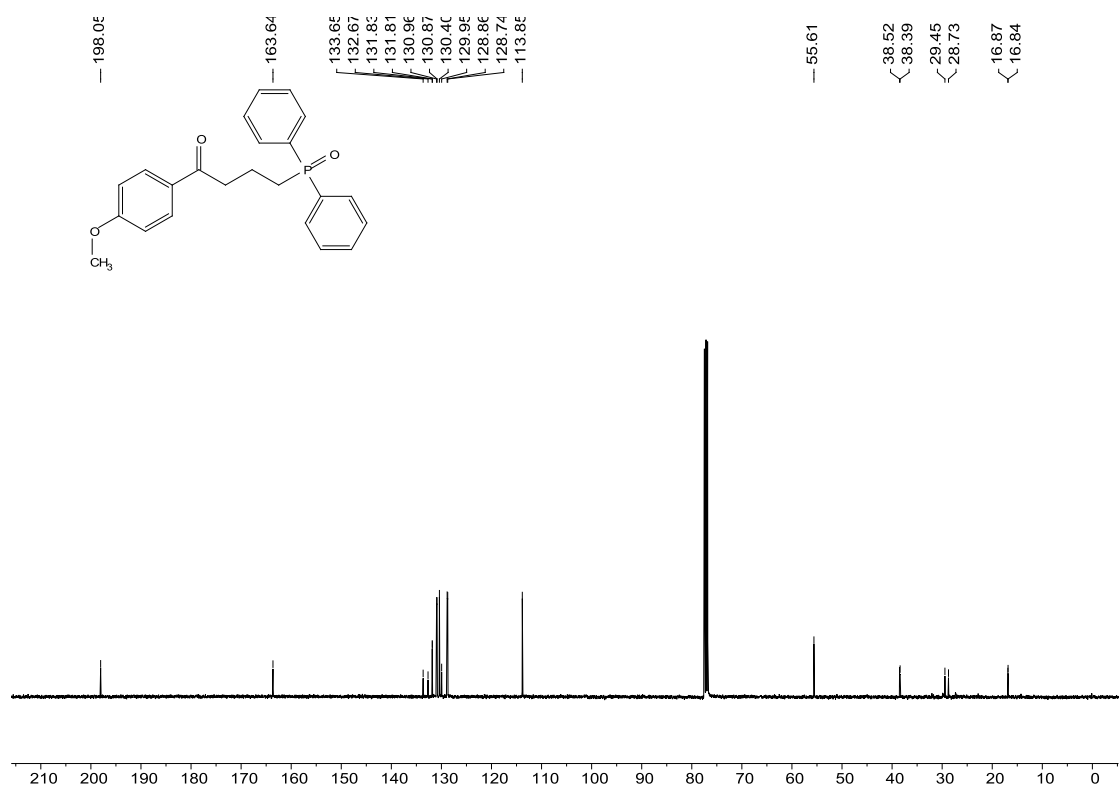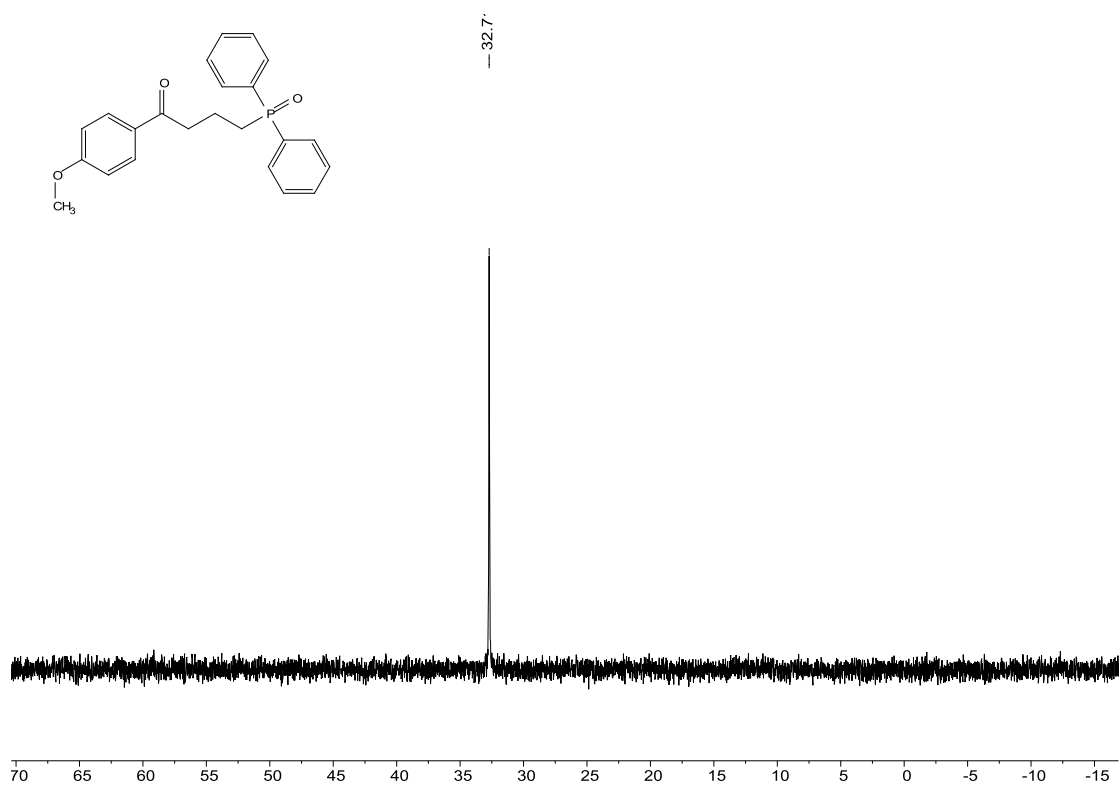

3e

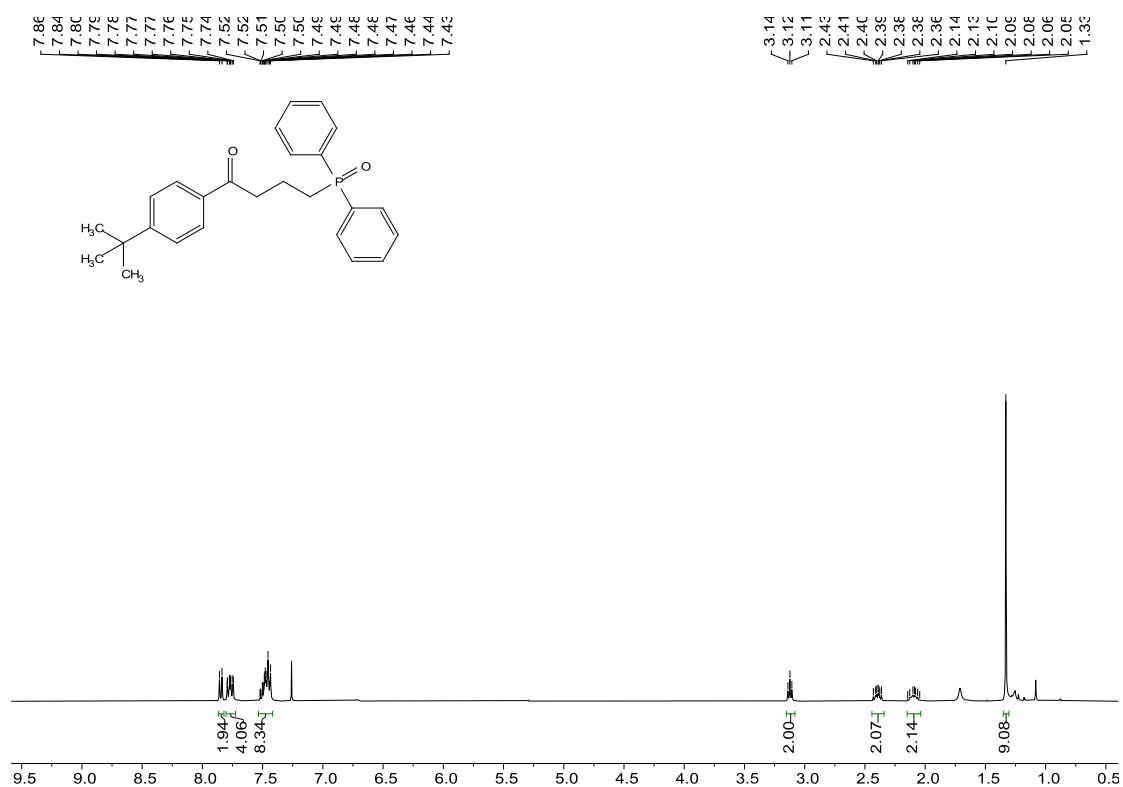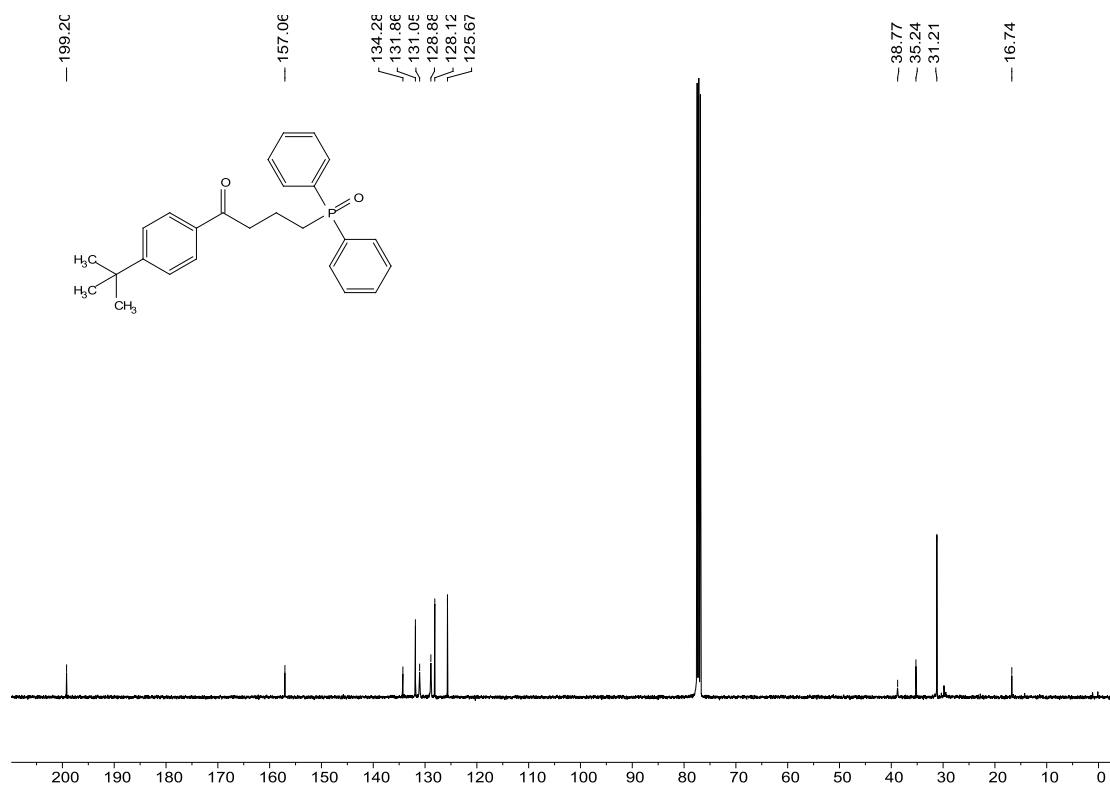

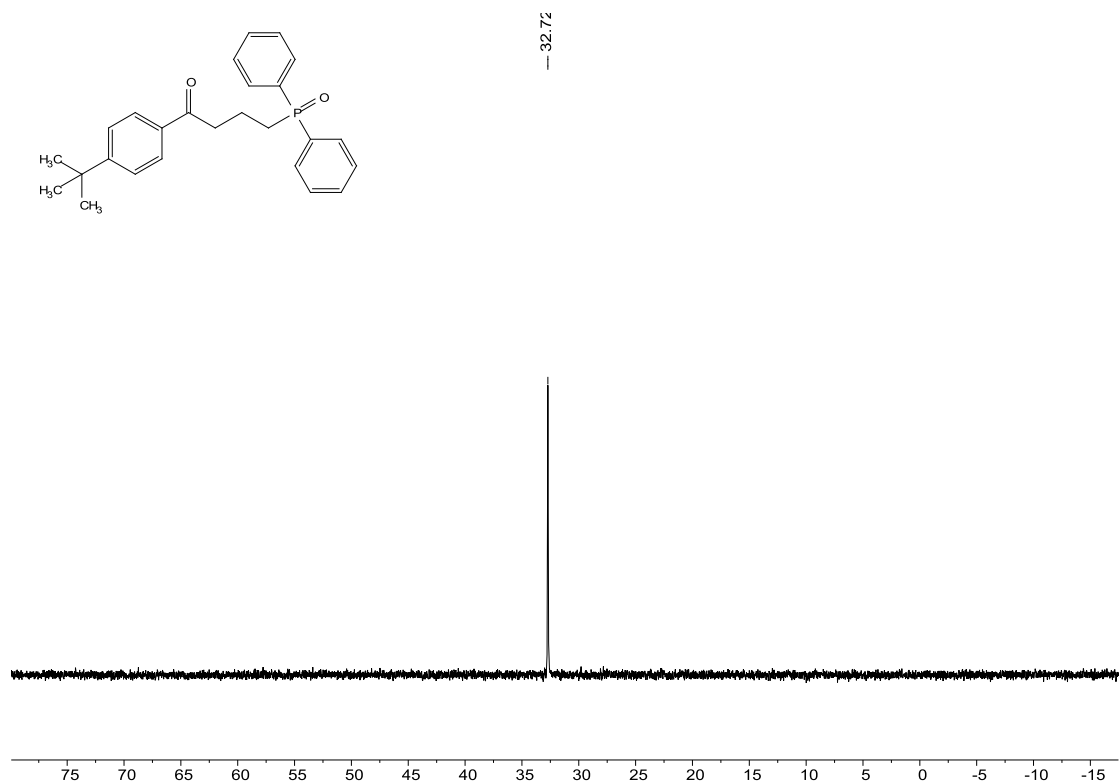

**3f**

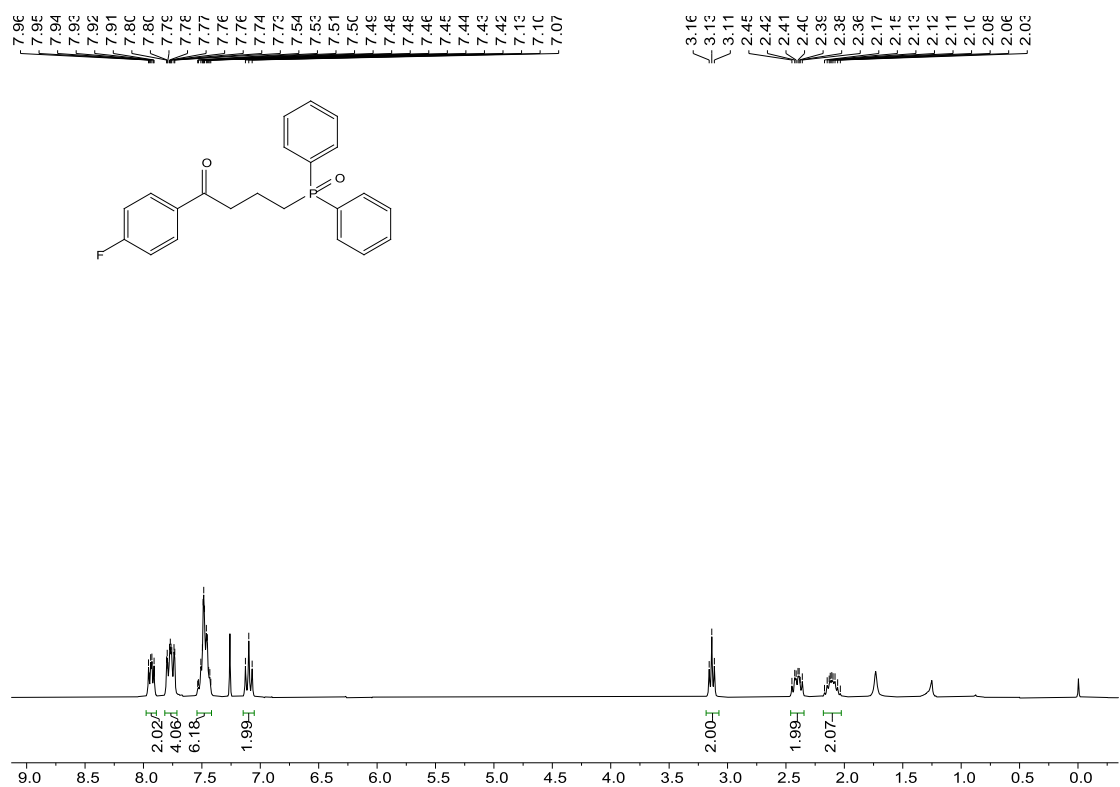





3g

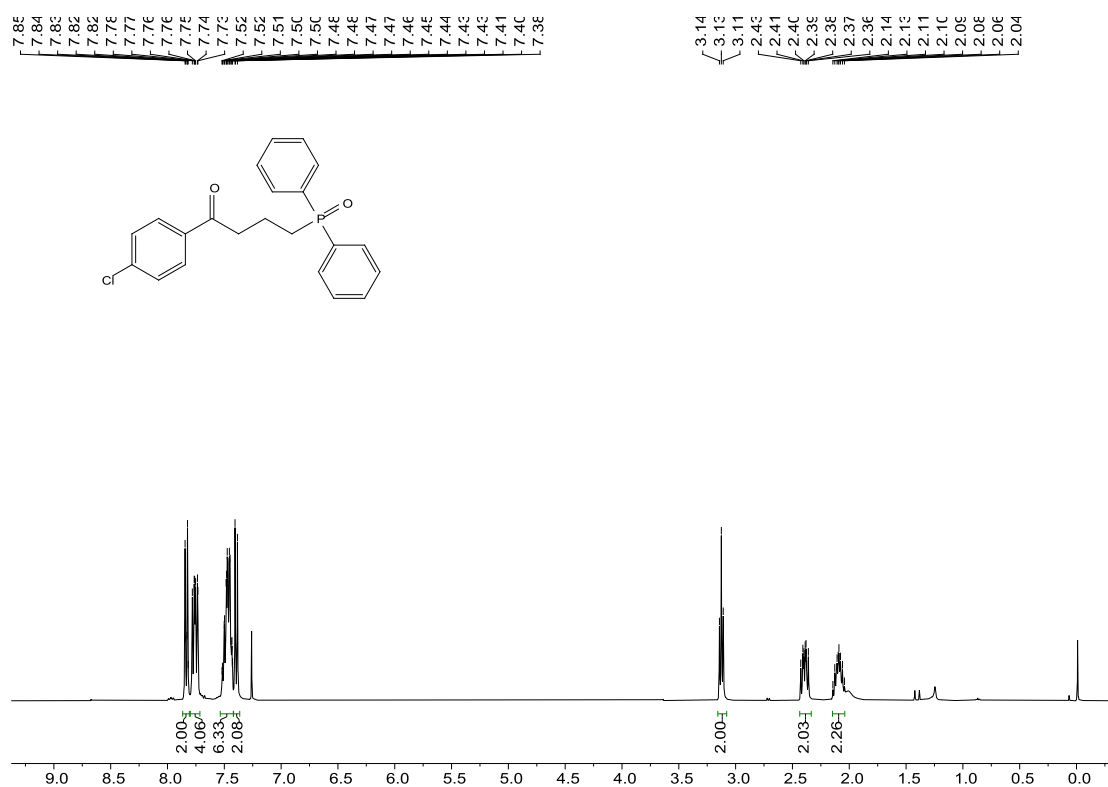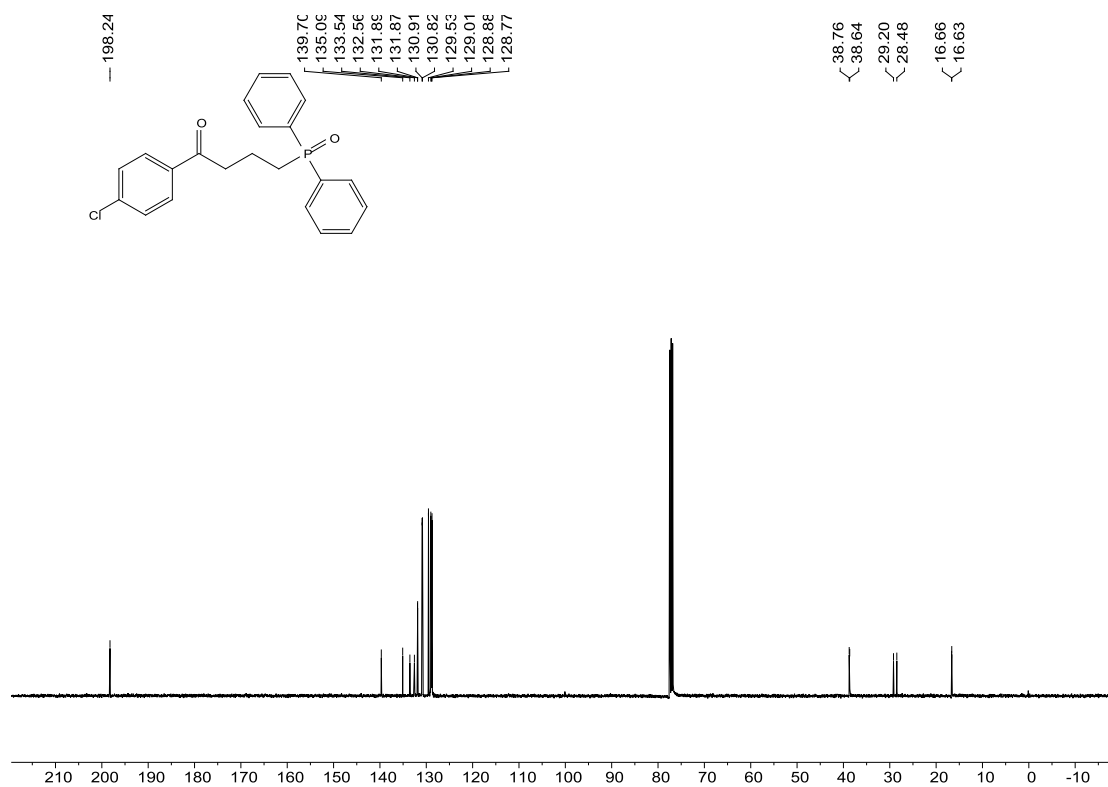

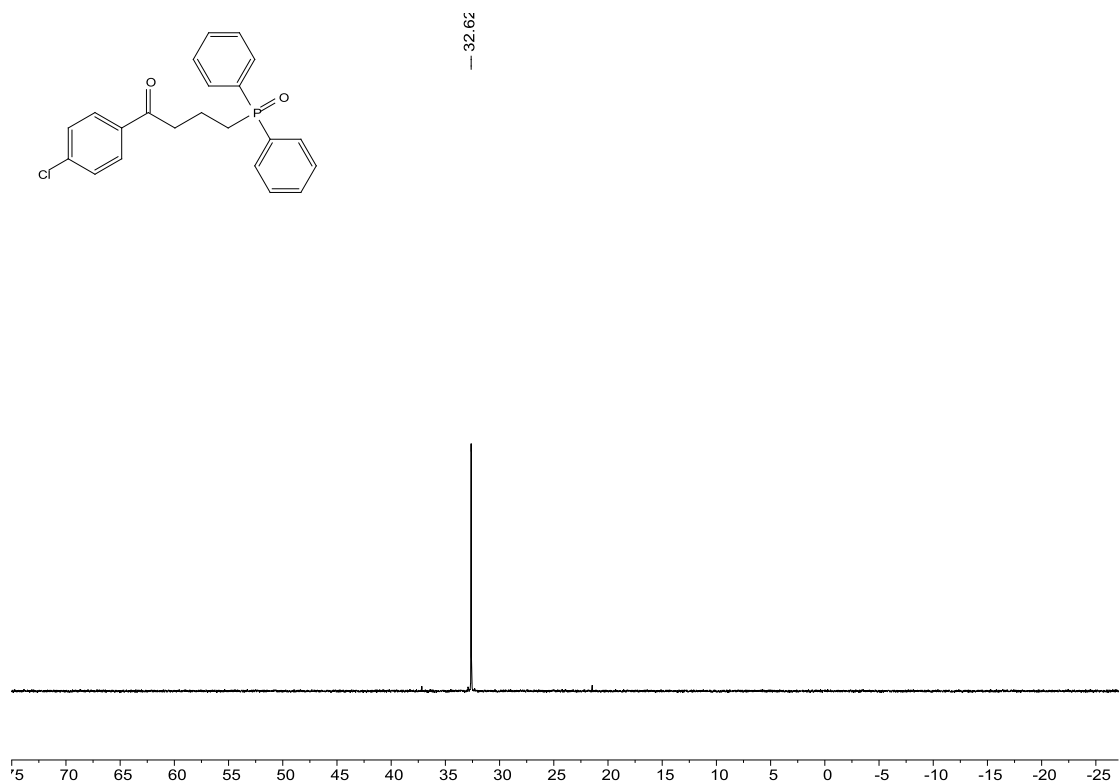

**3h**

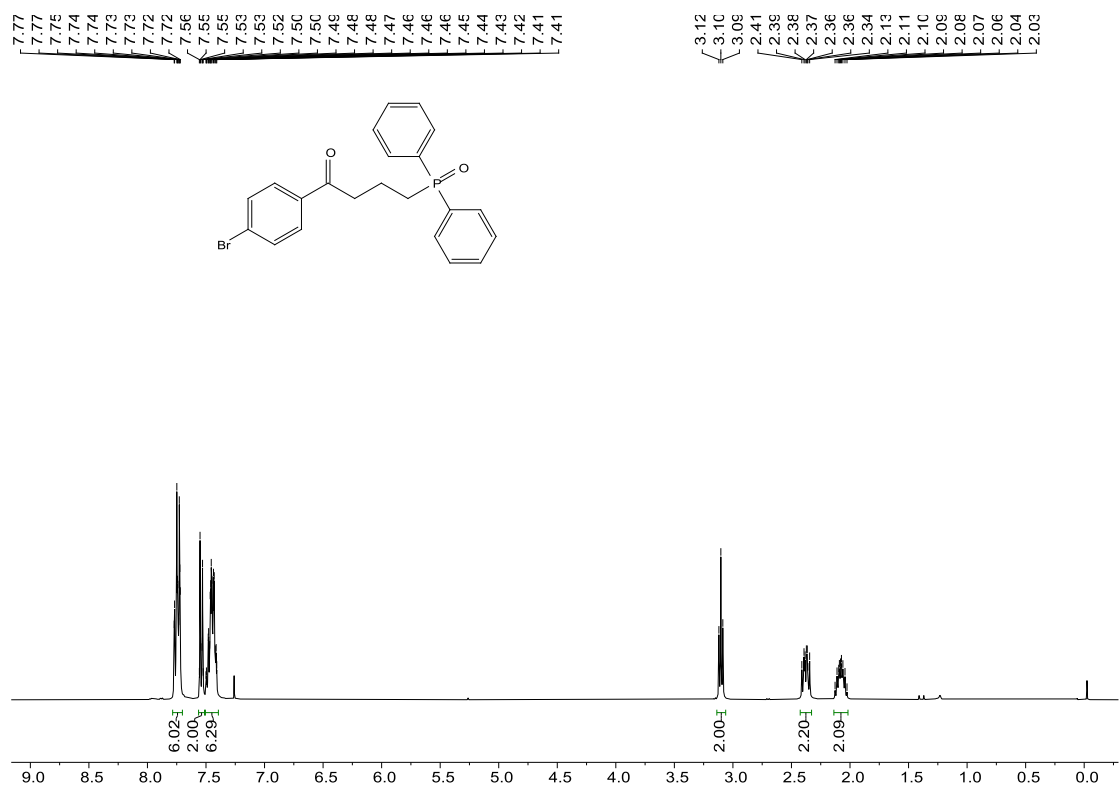

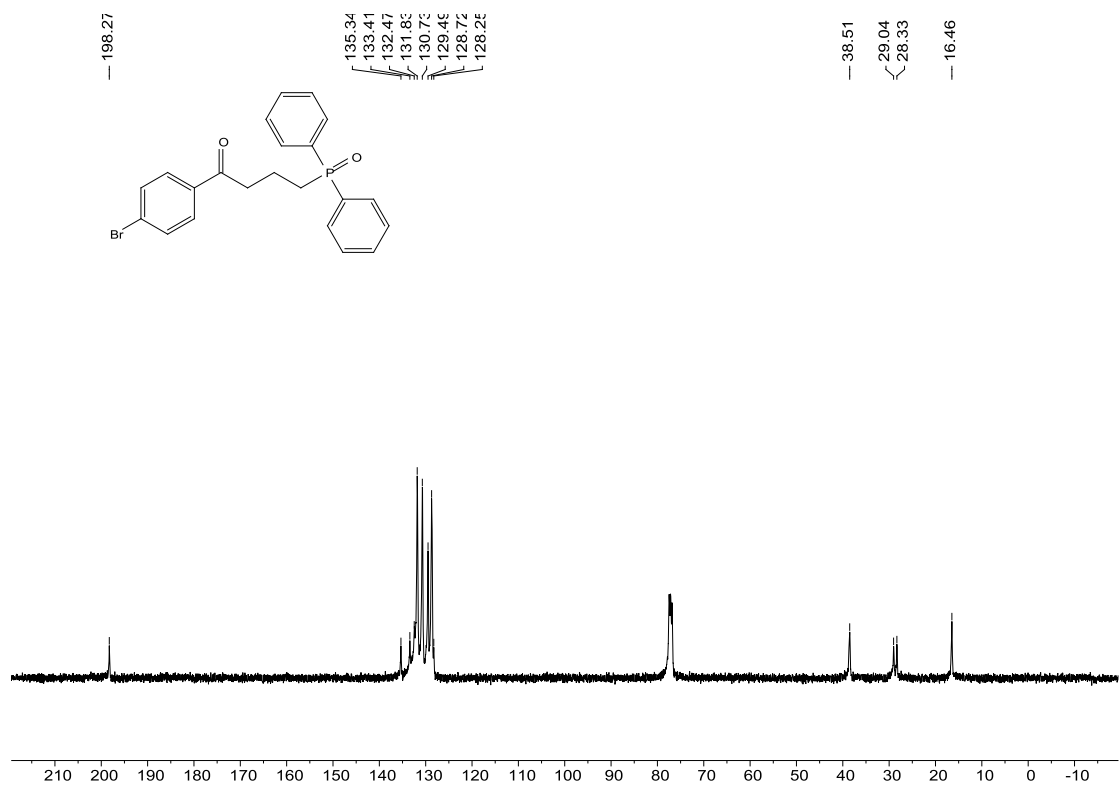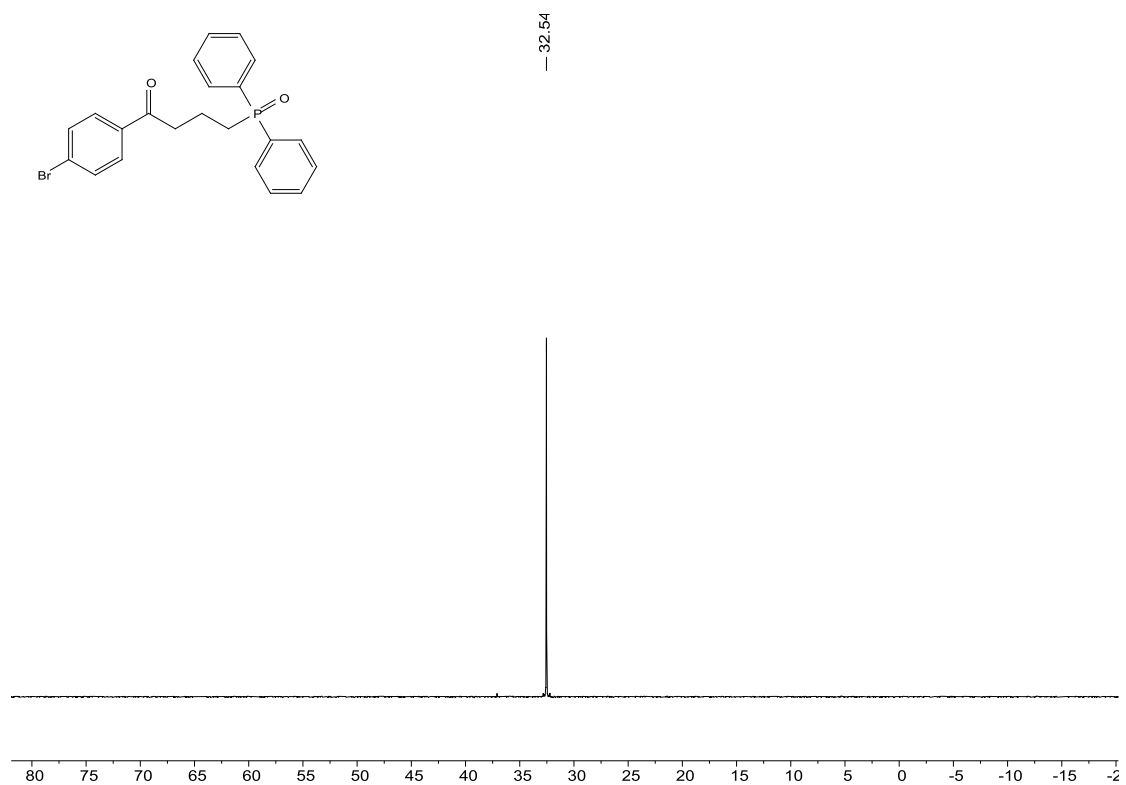

3i

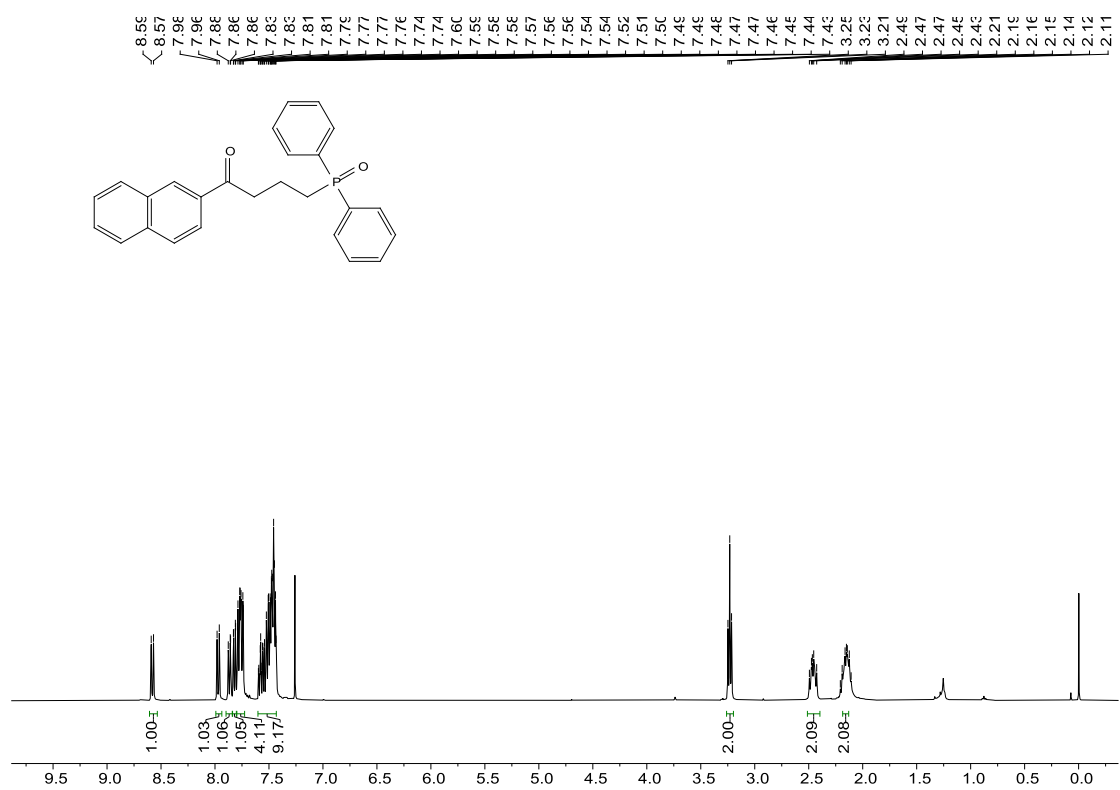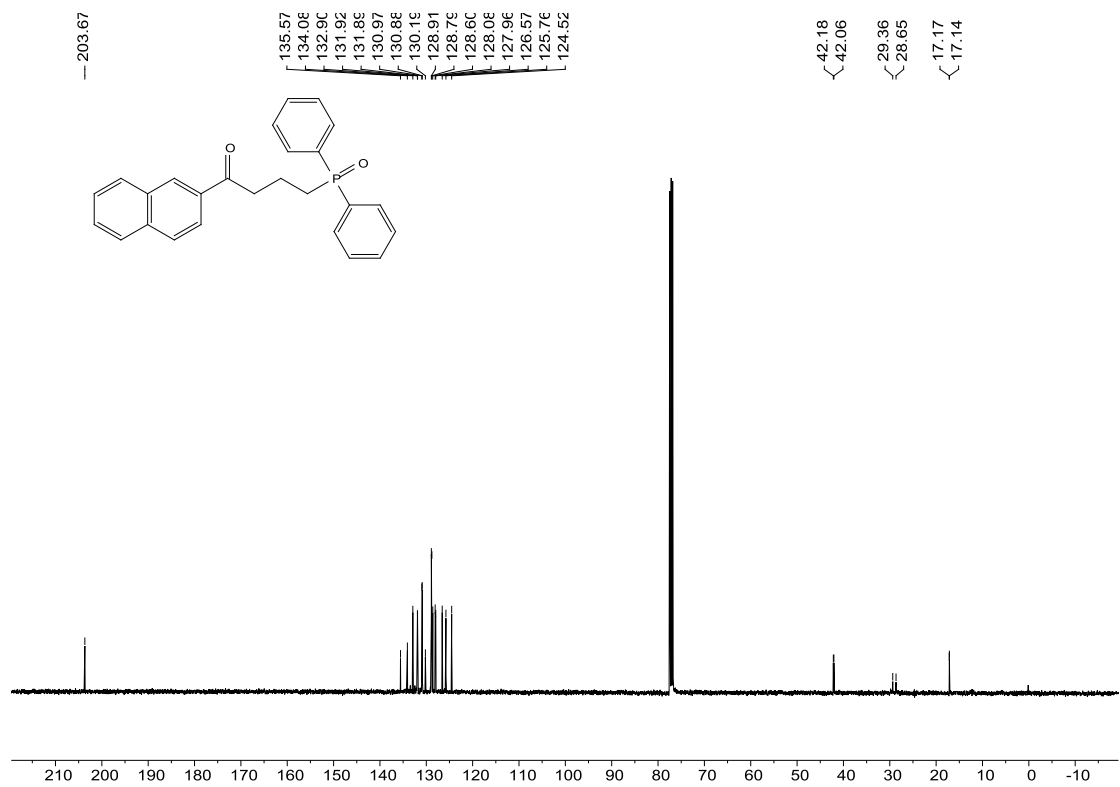

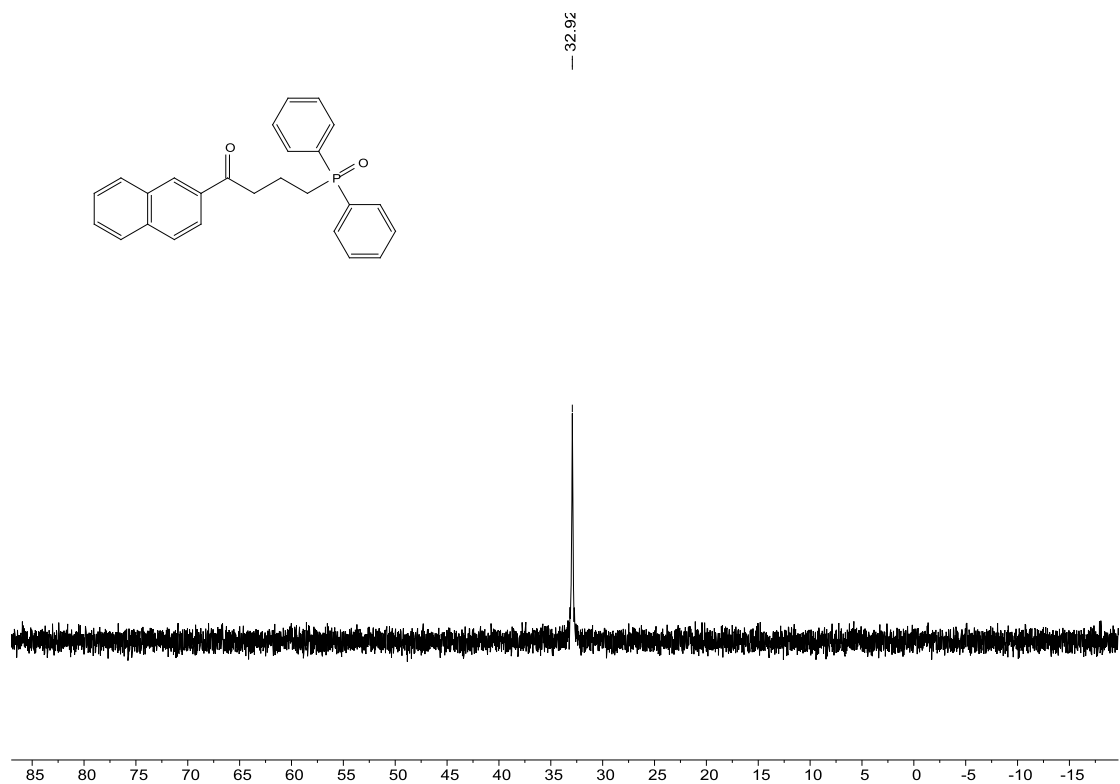

**3j**

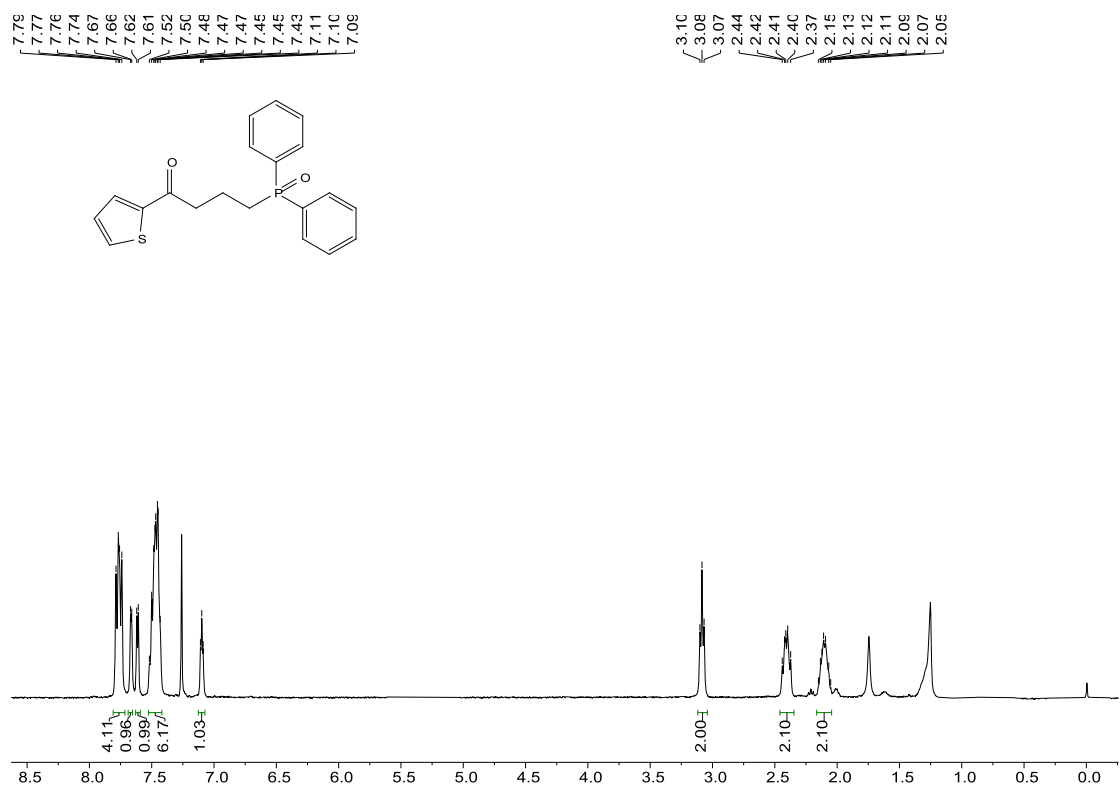

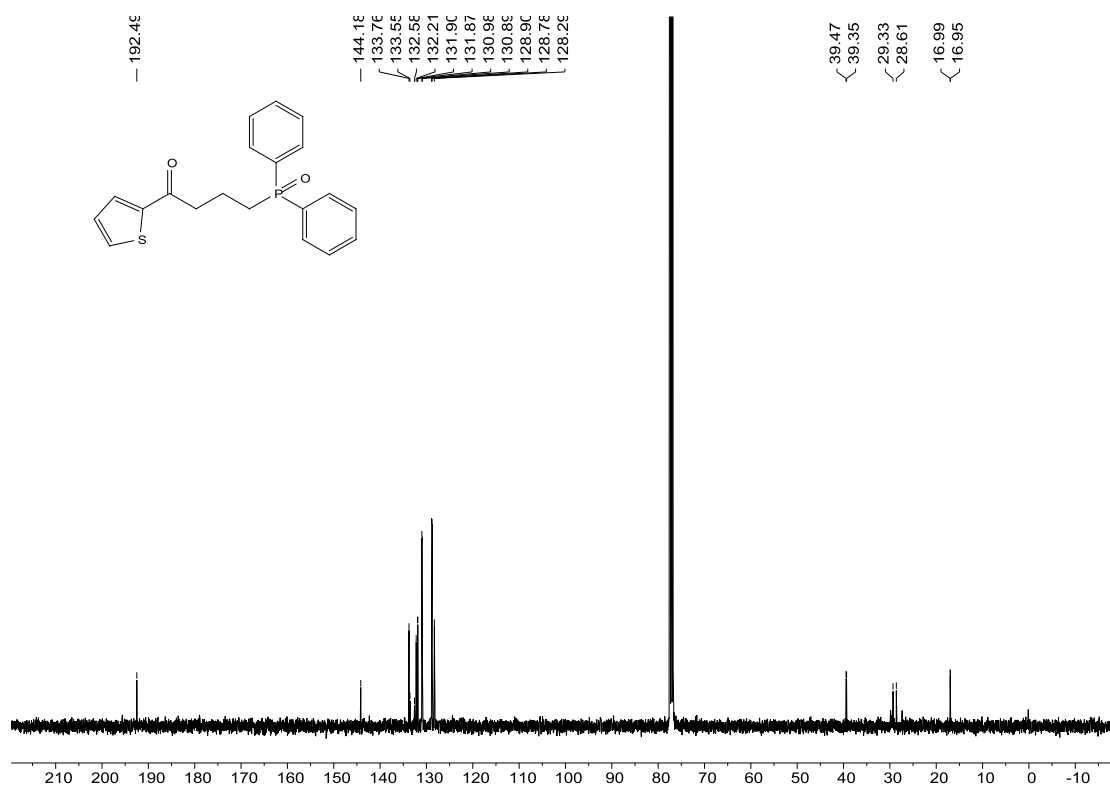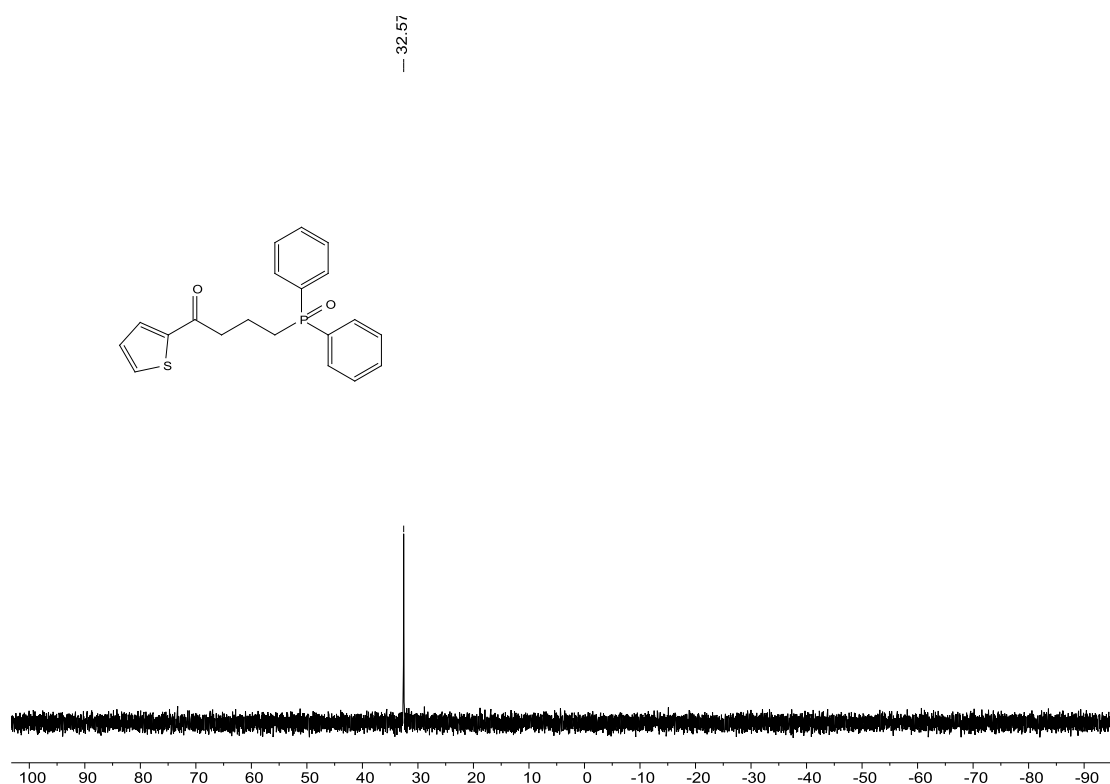

3m

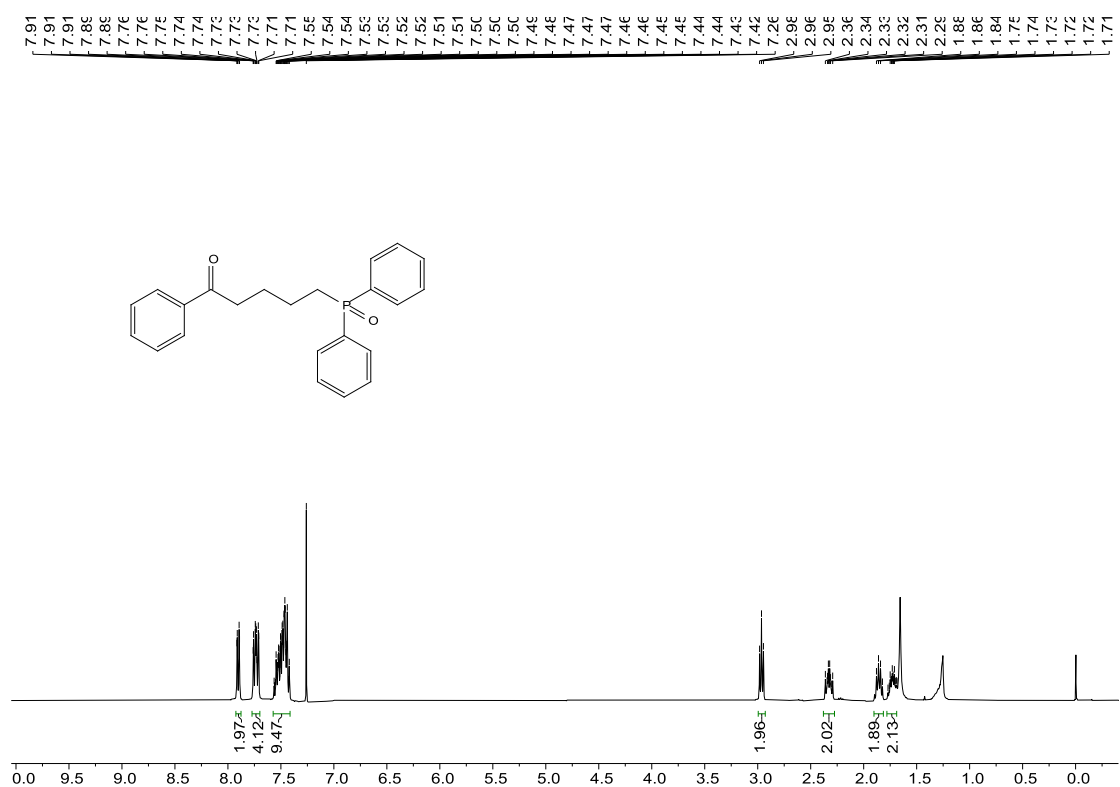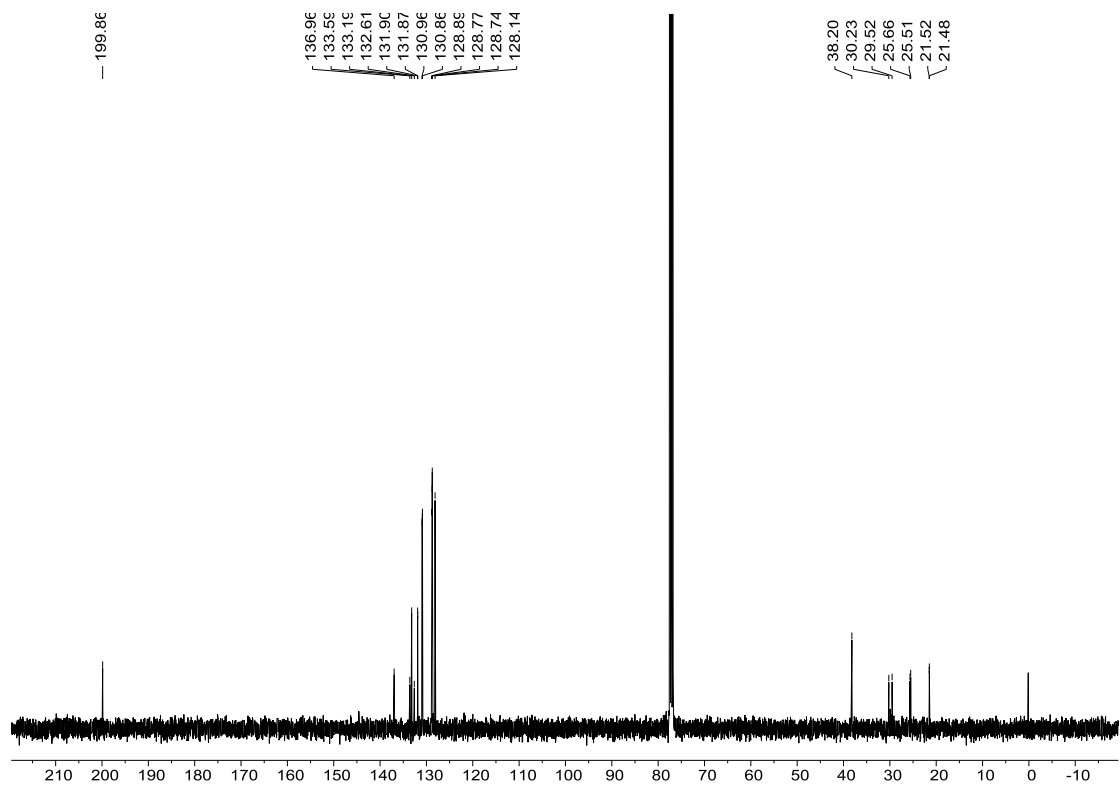

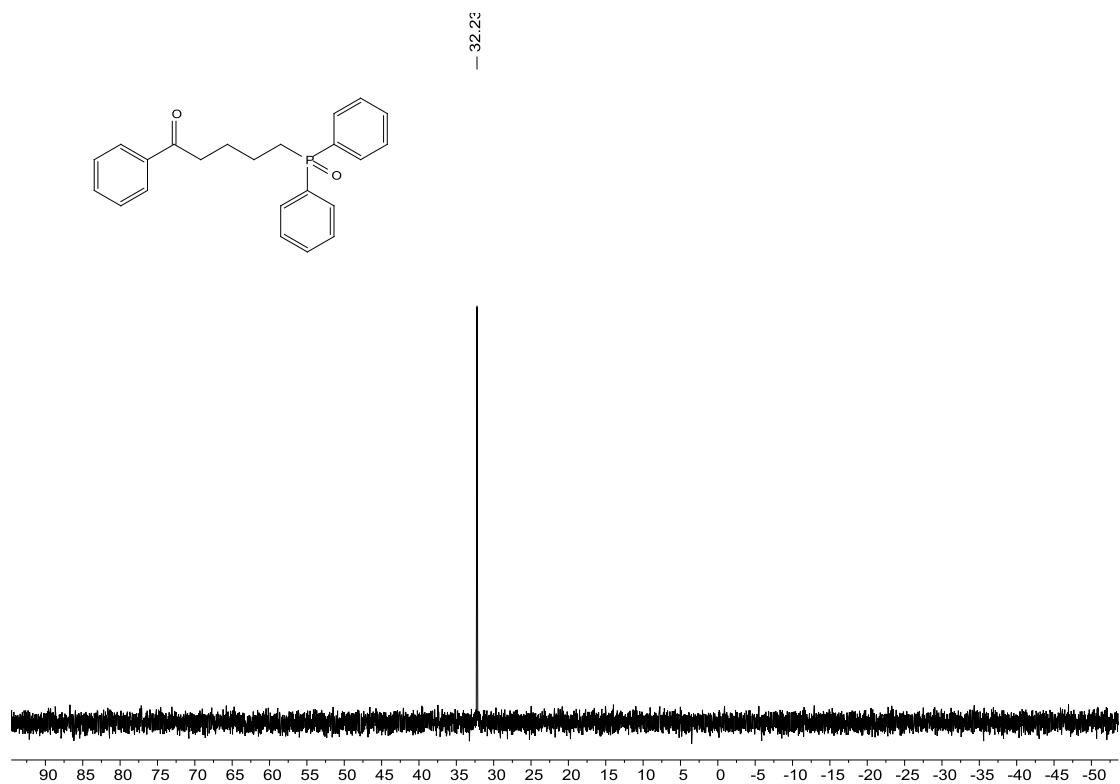

**3n**

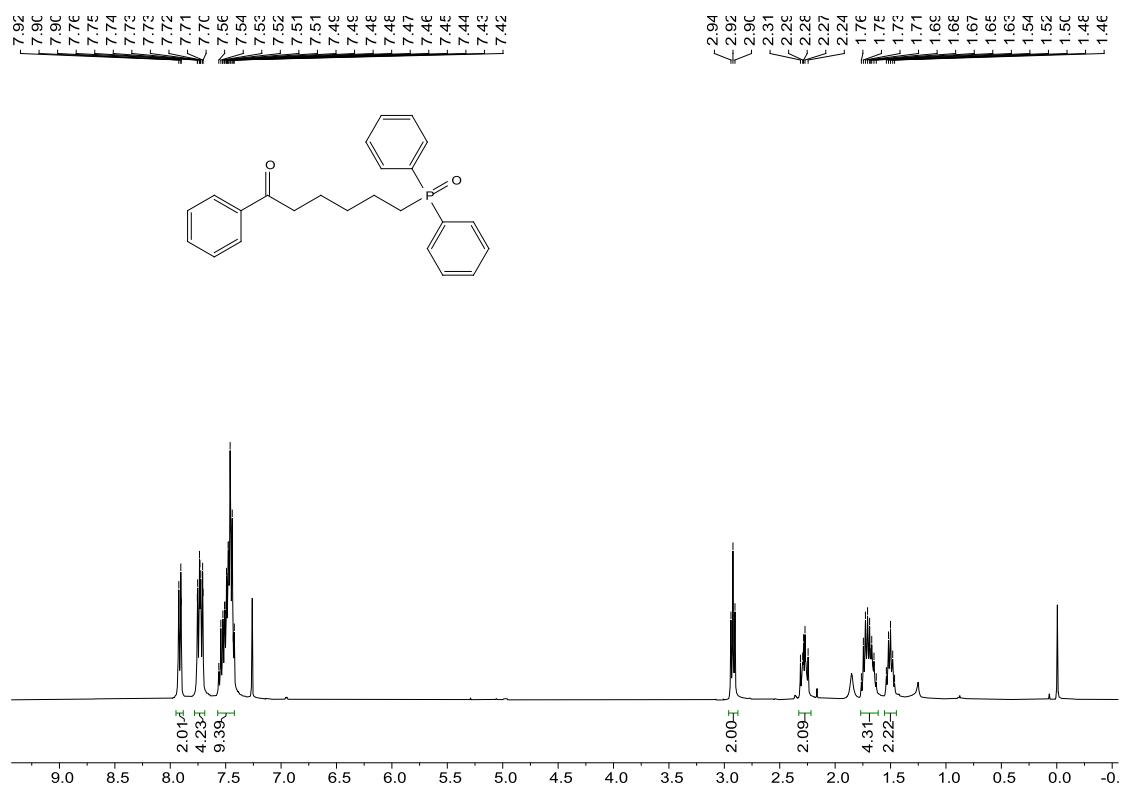



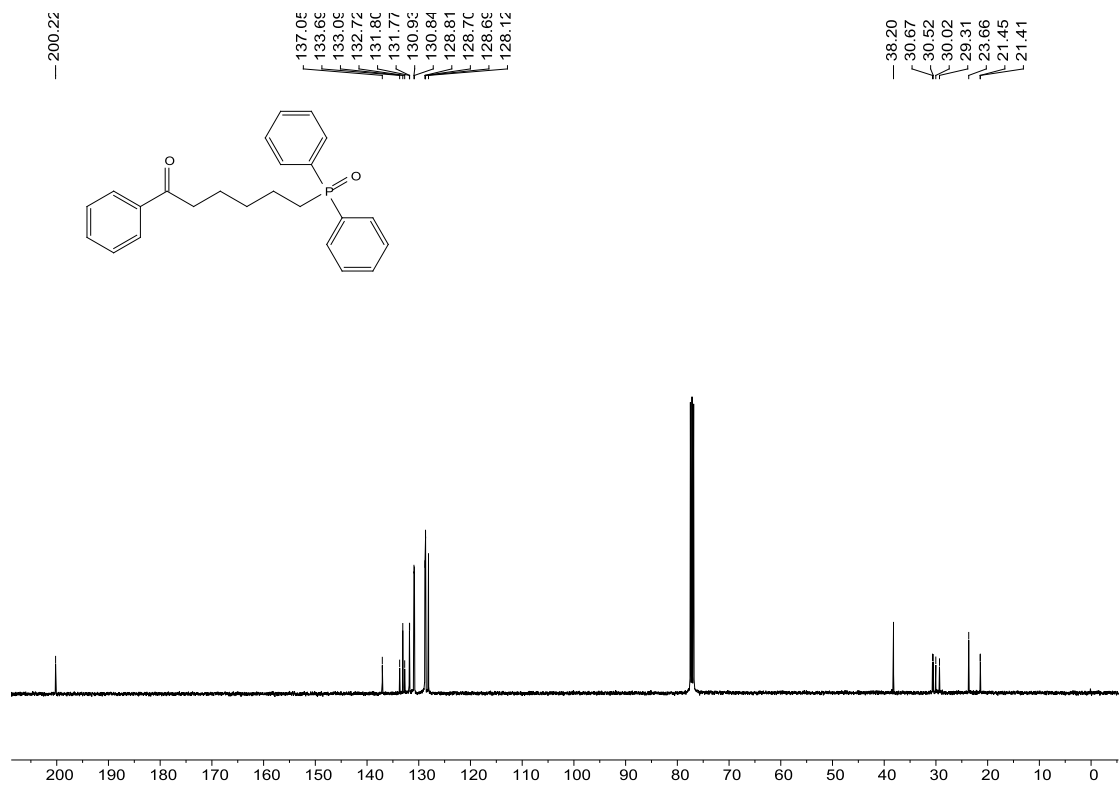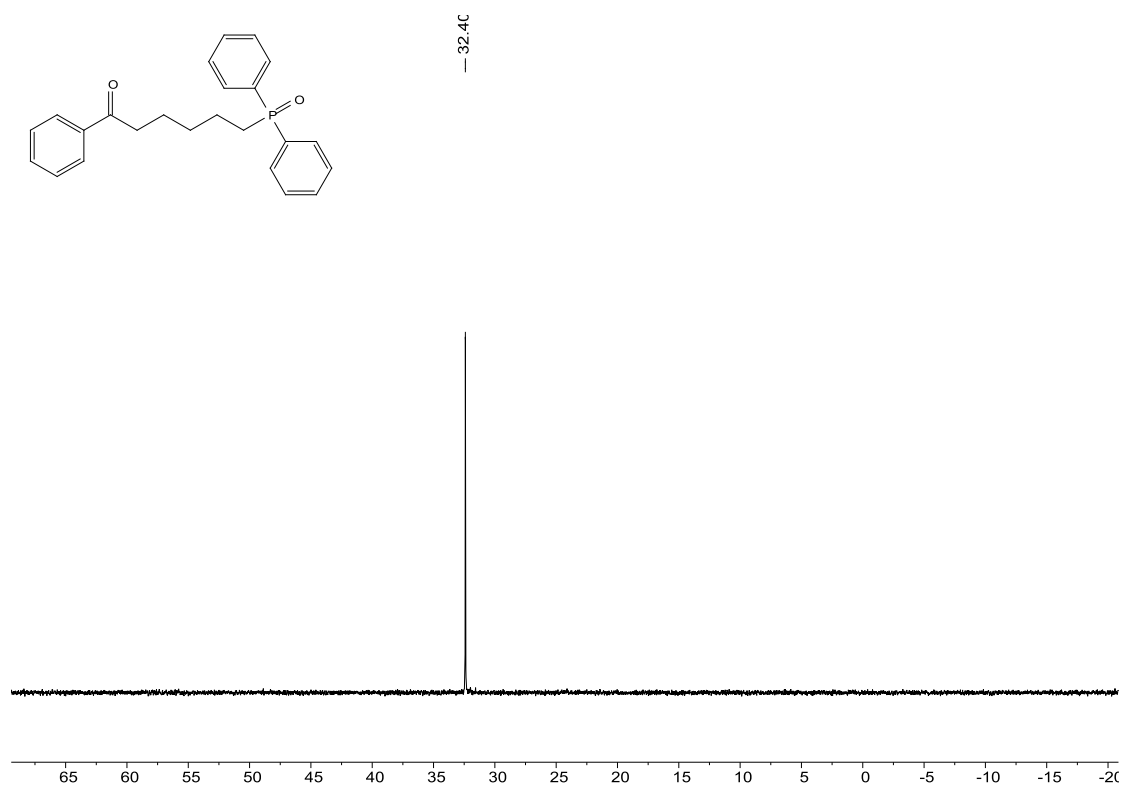

3p'

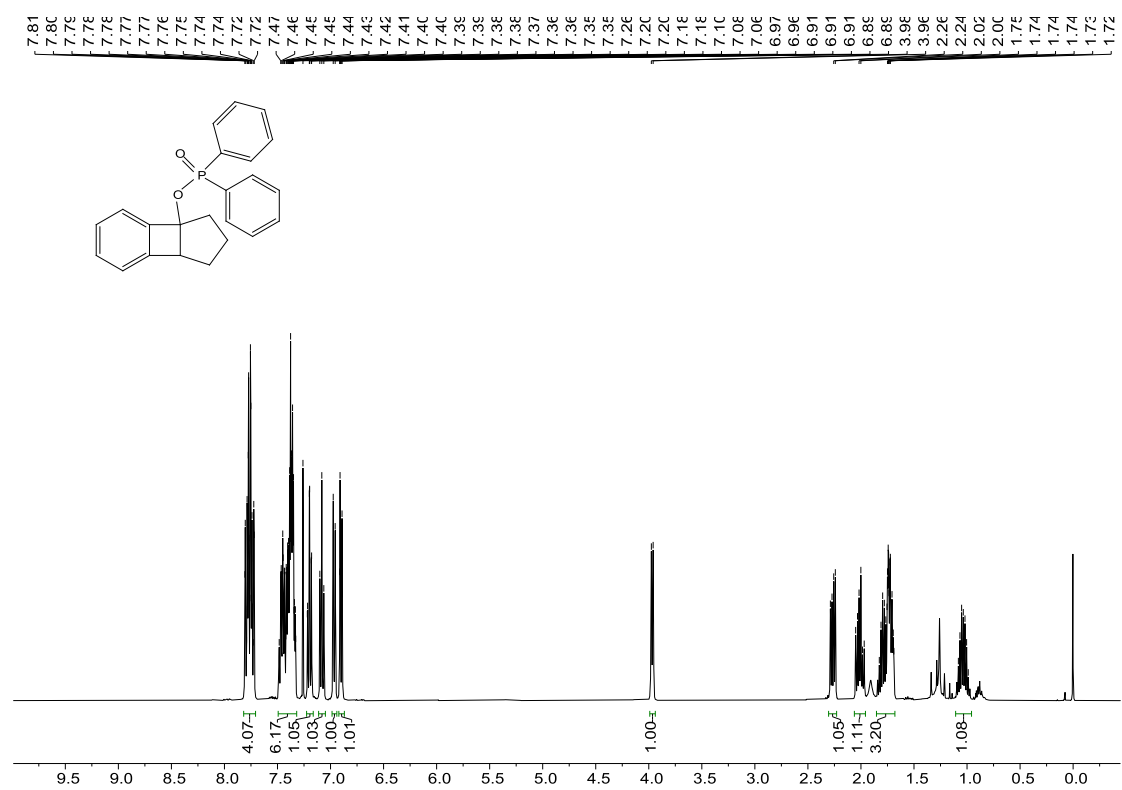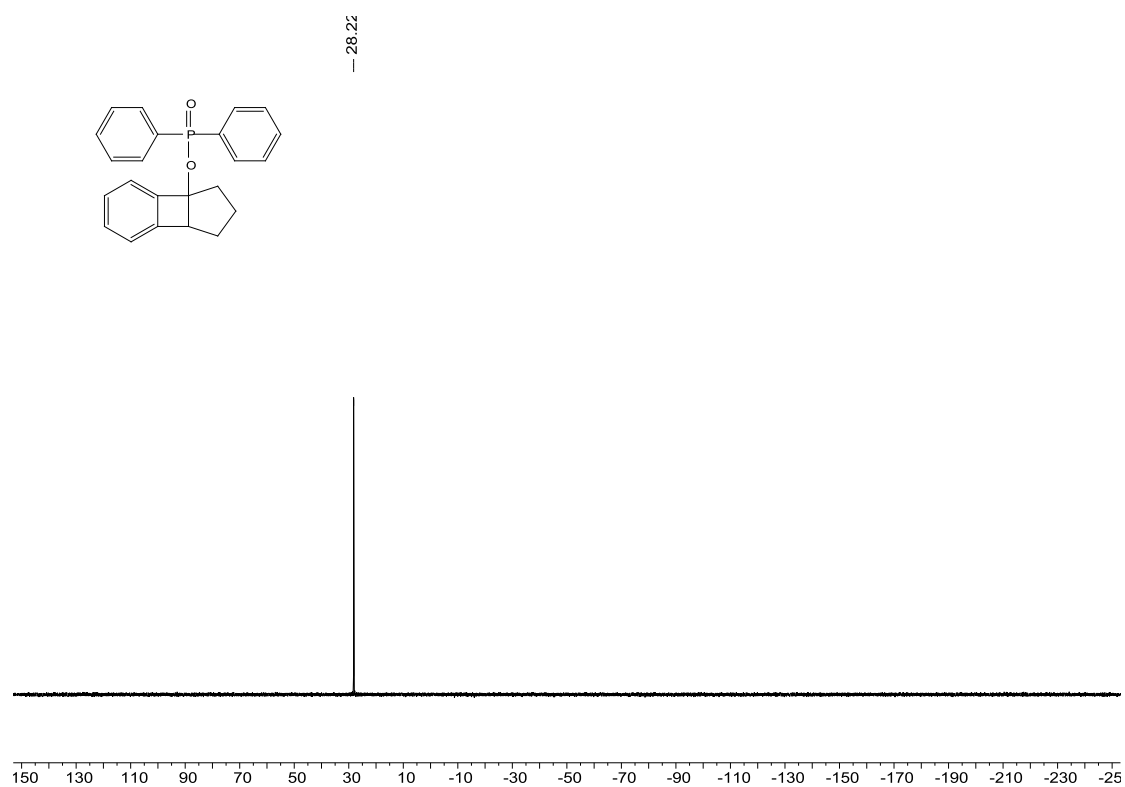

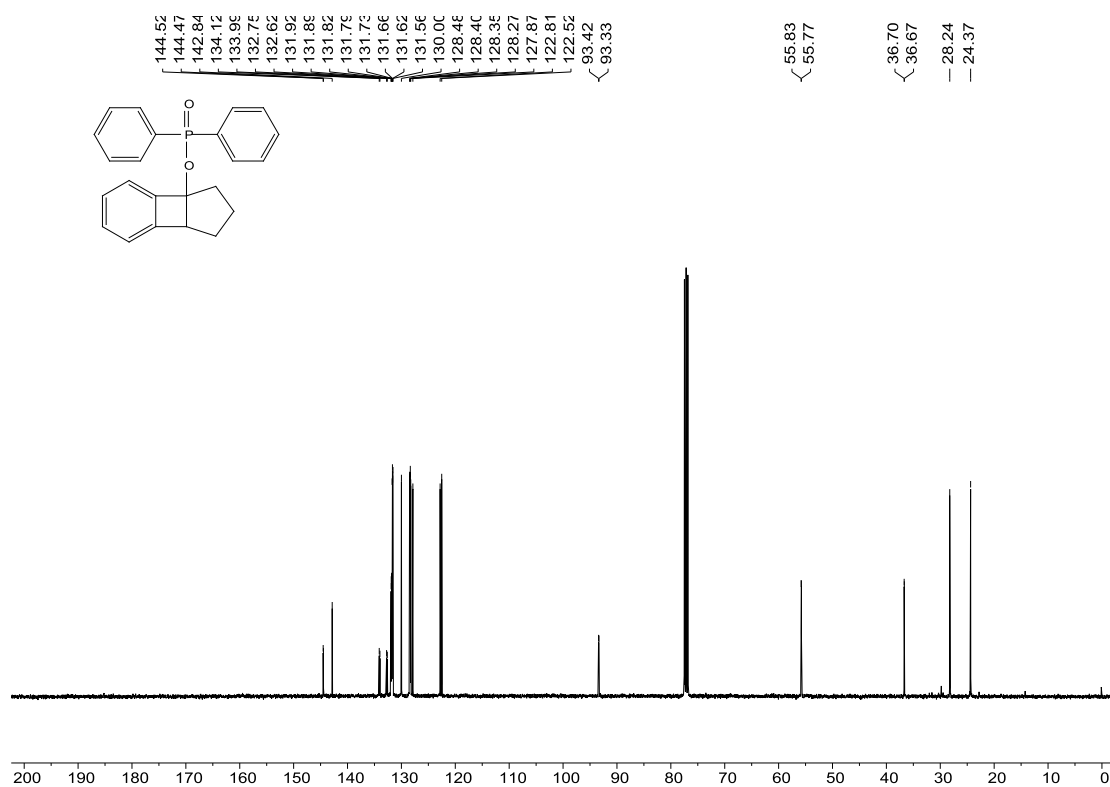

**3q'**

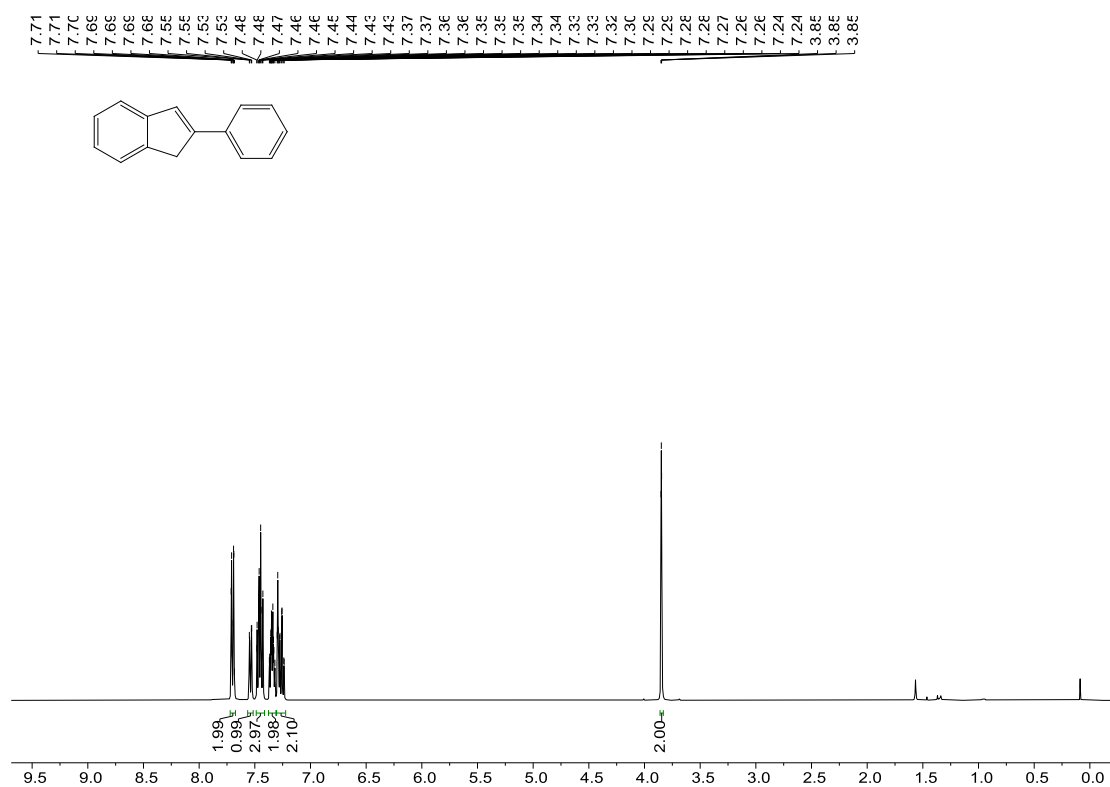

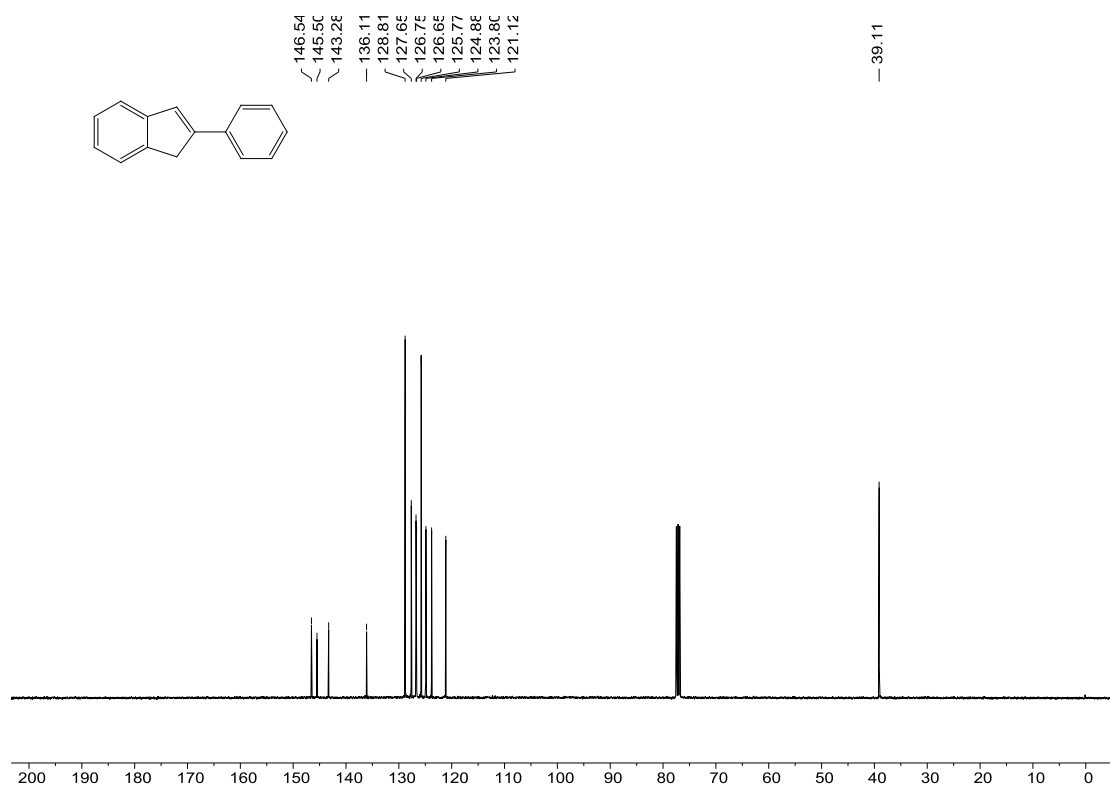

**3r'**

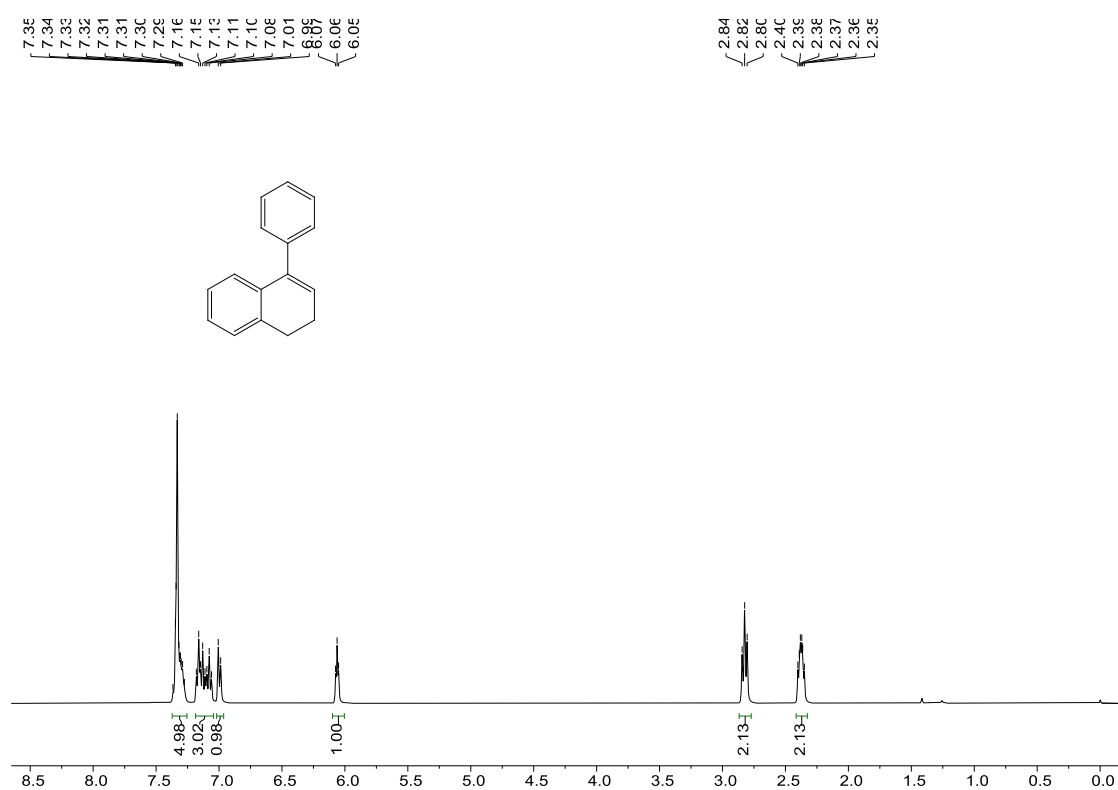

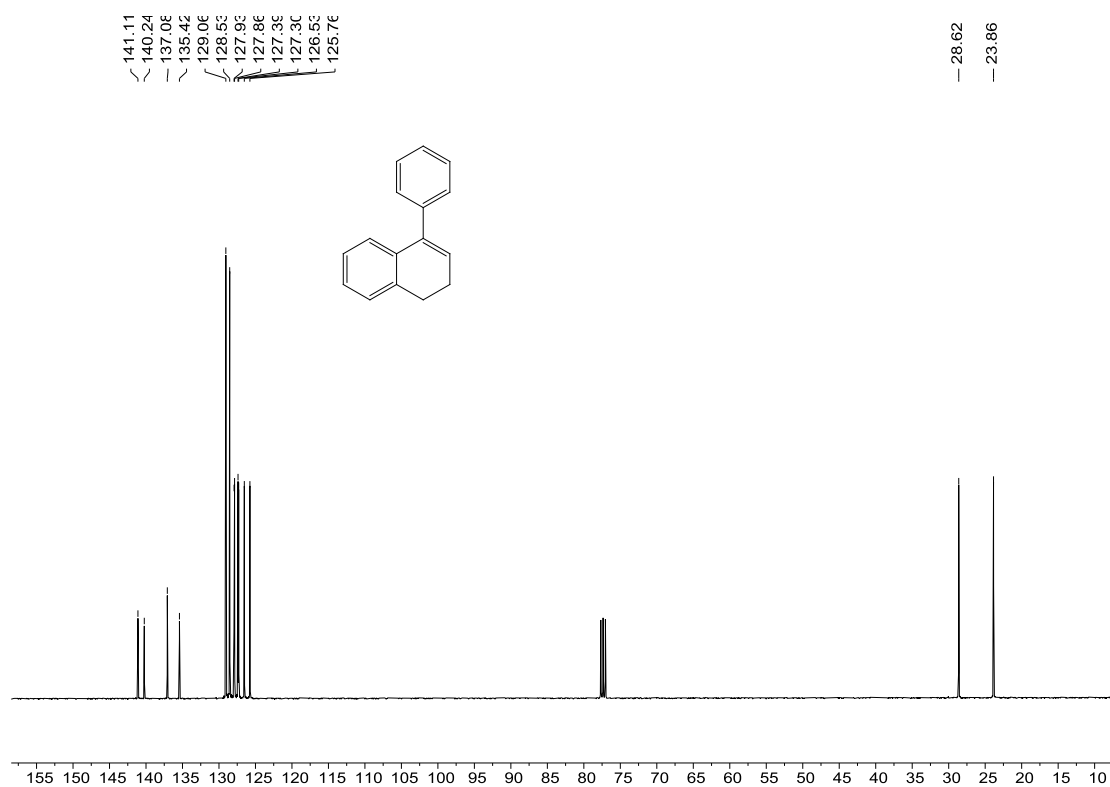

3s'

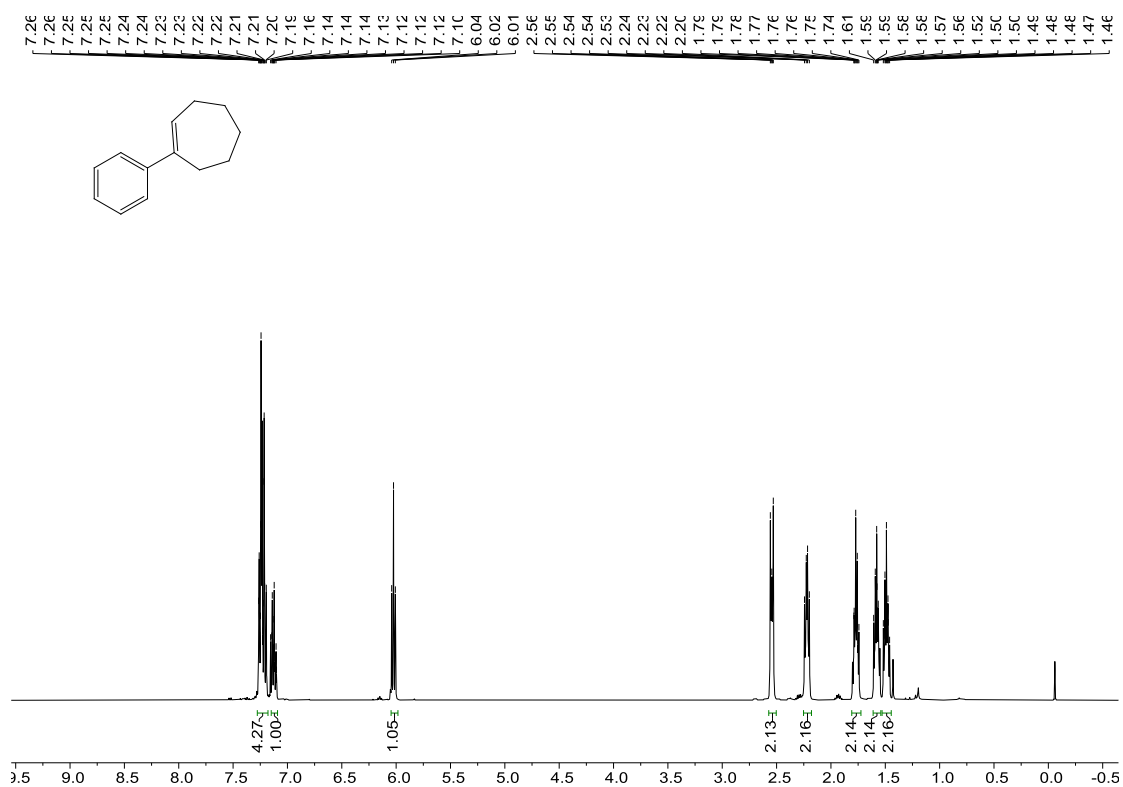

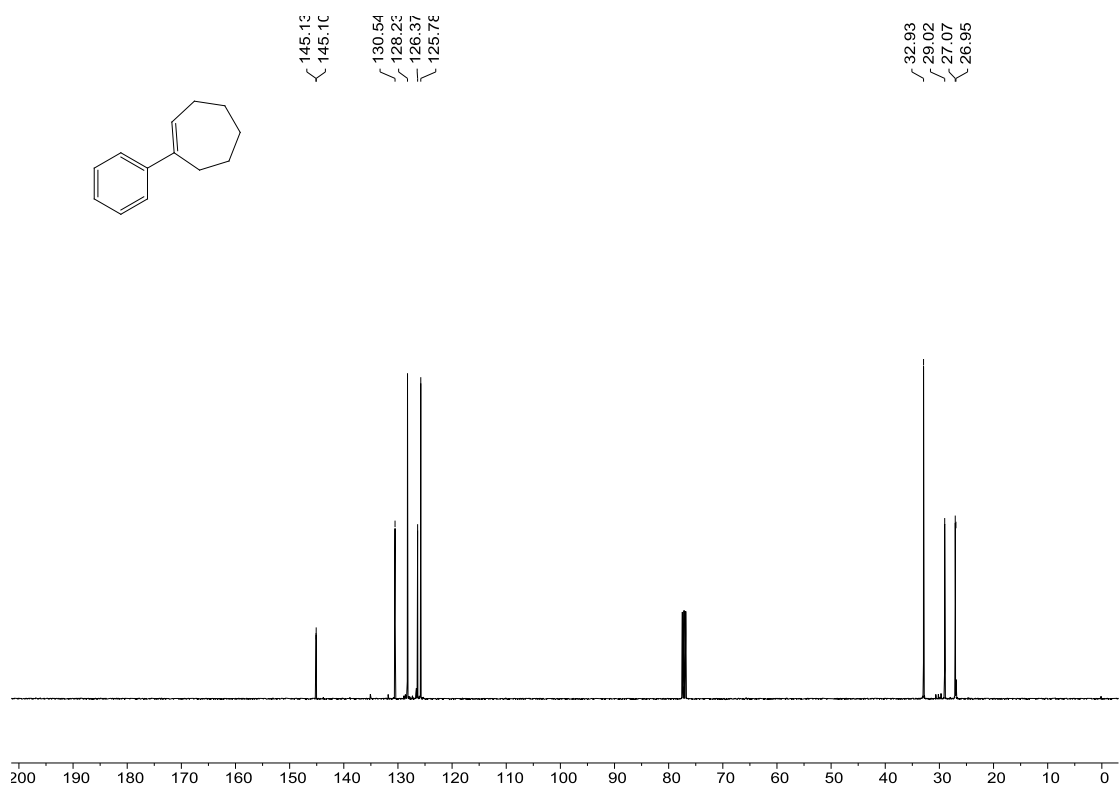

**3t'**

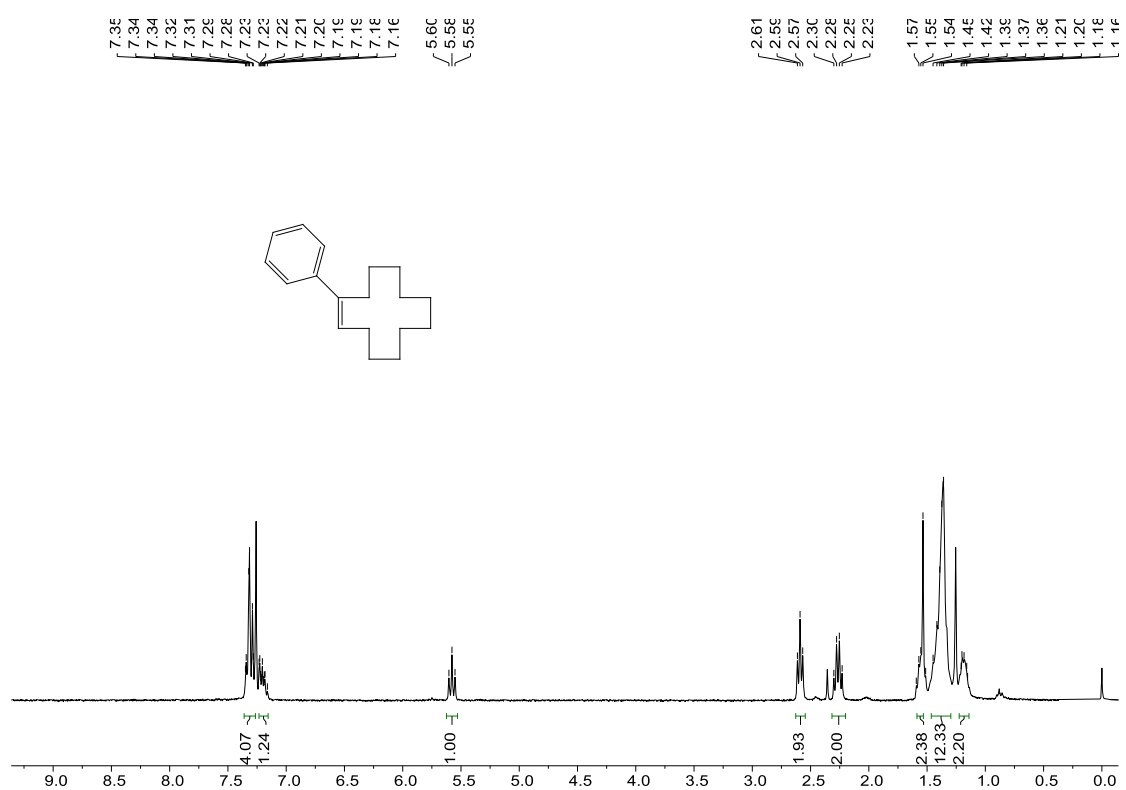

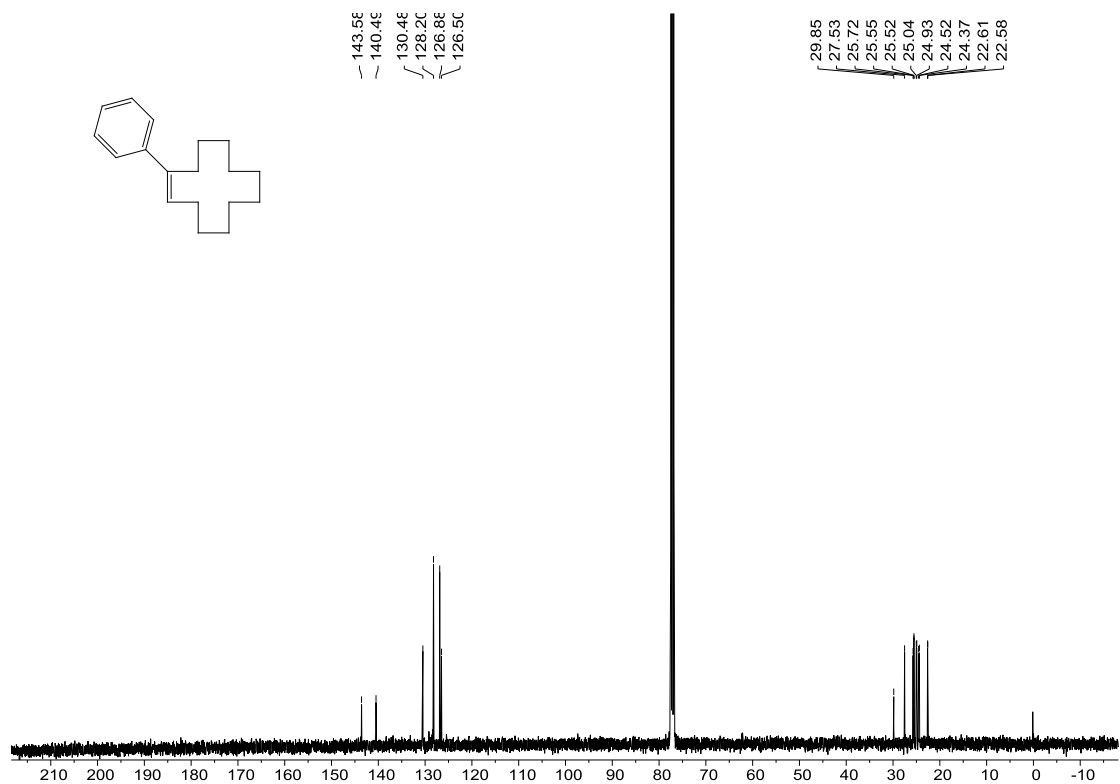

4a

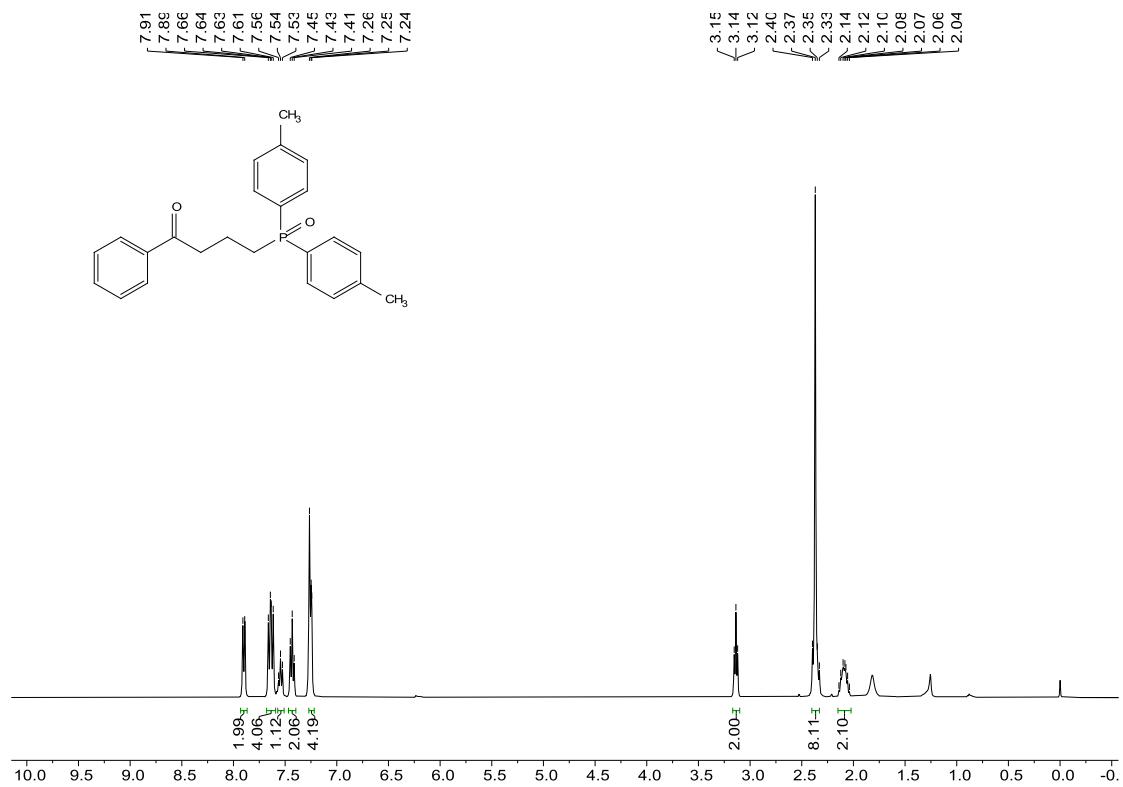

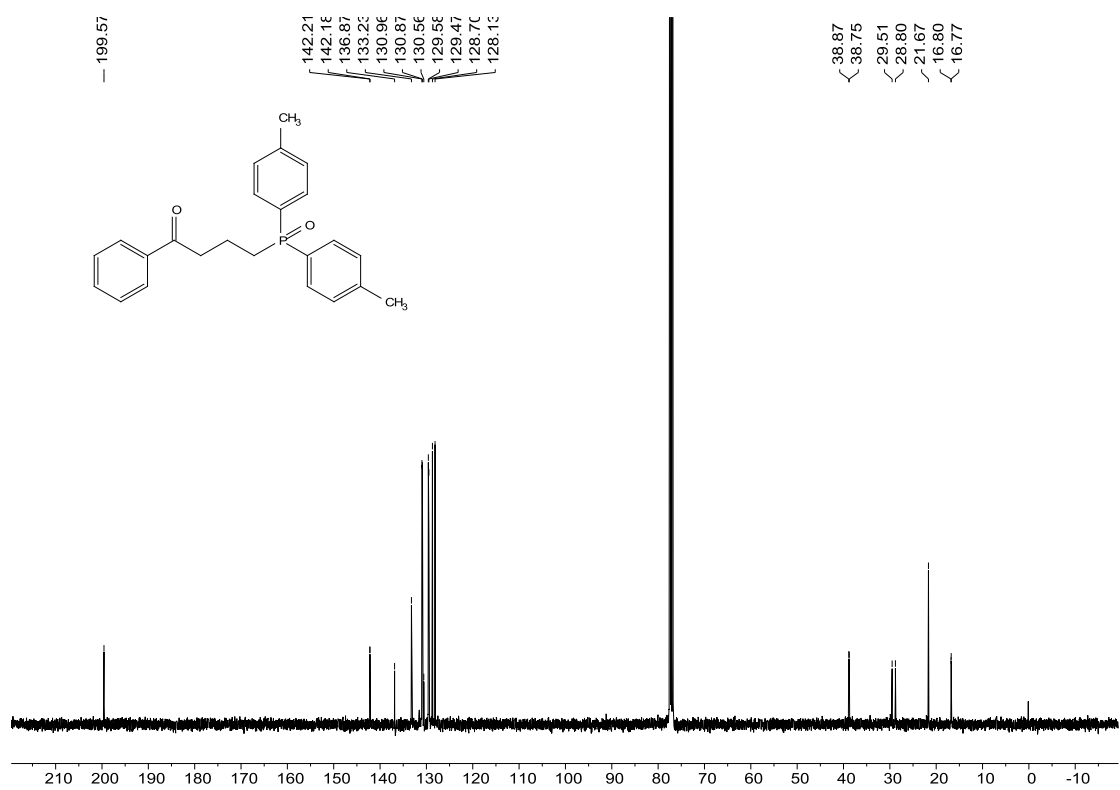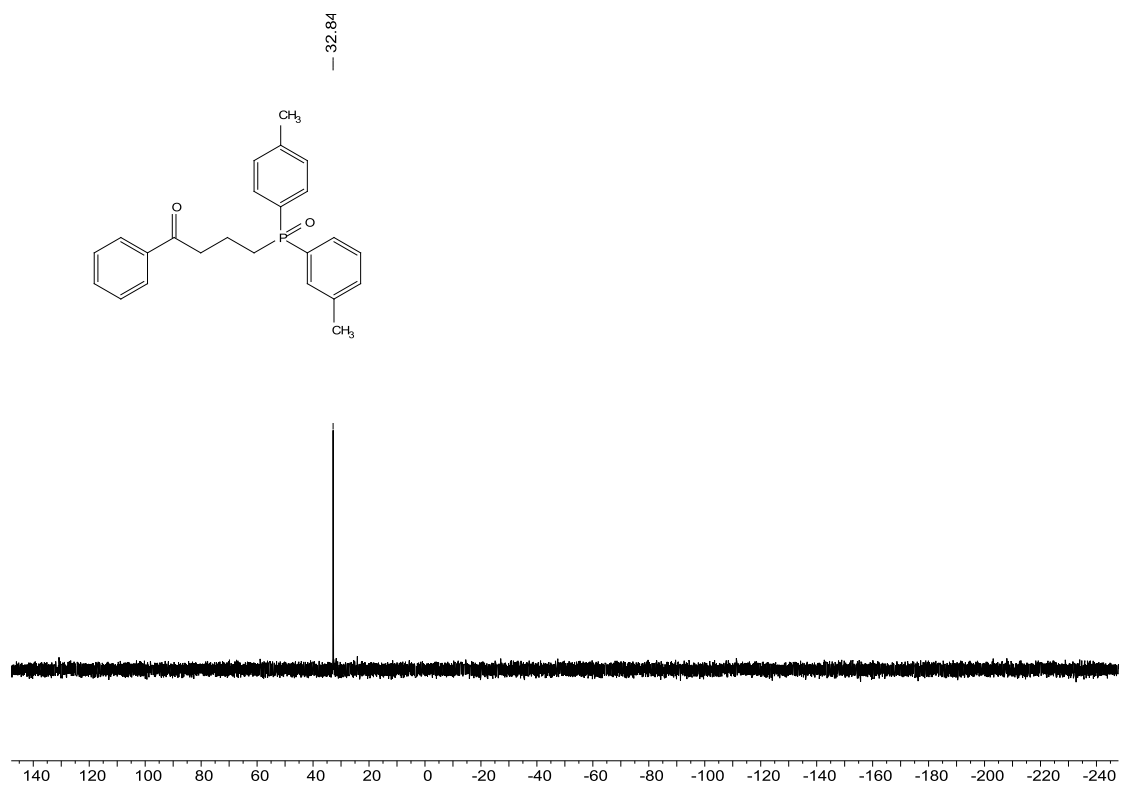



4b

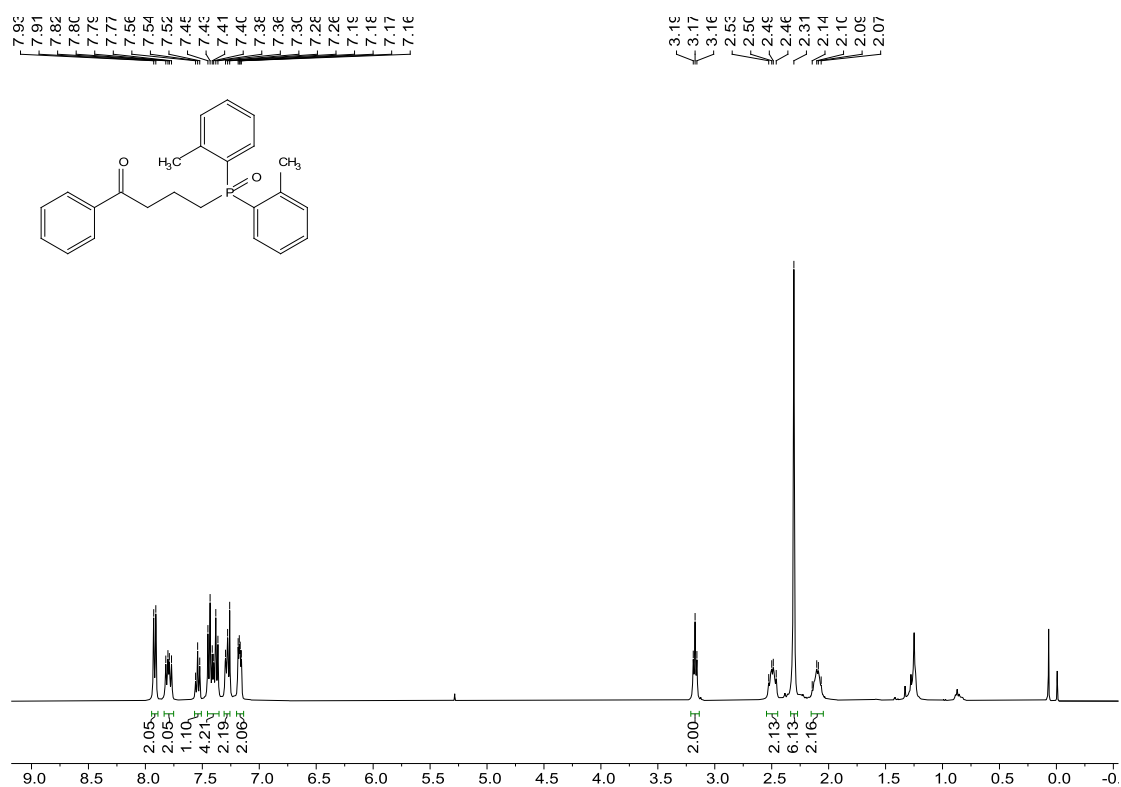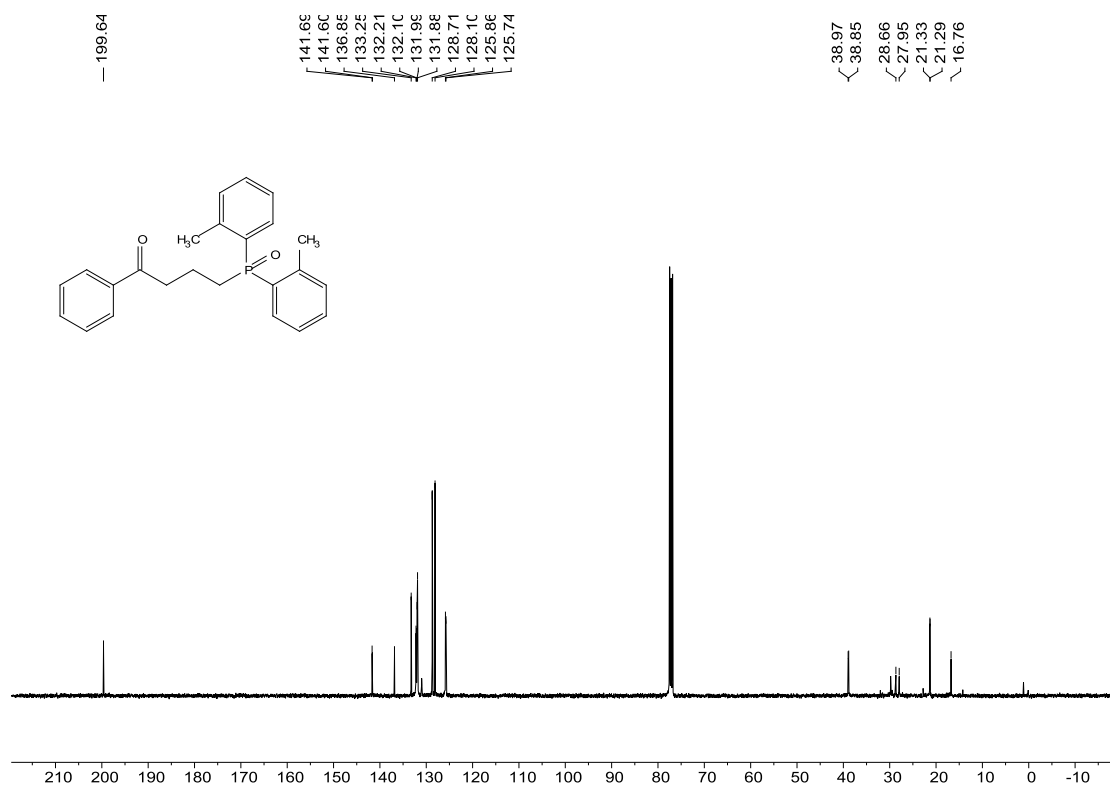

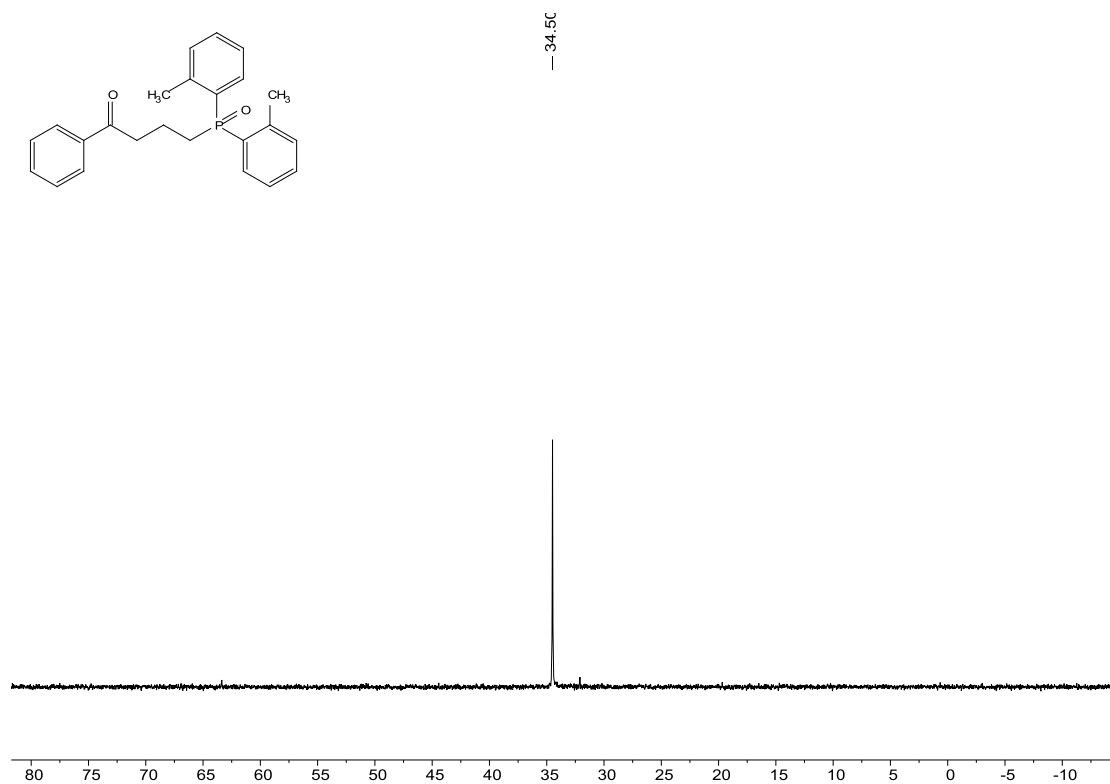

4c

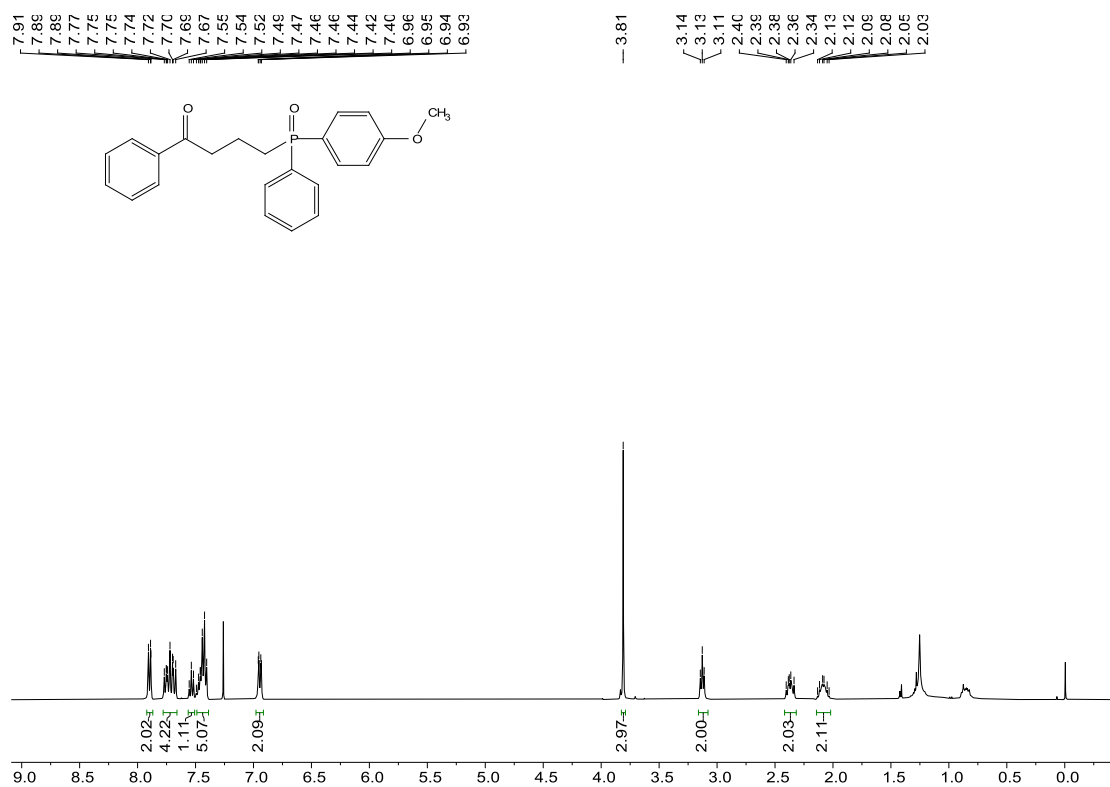

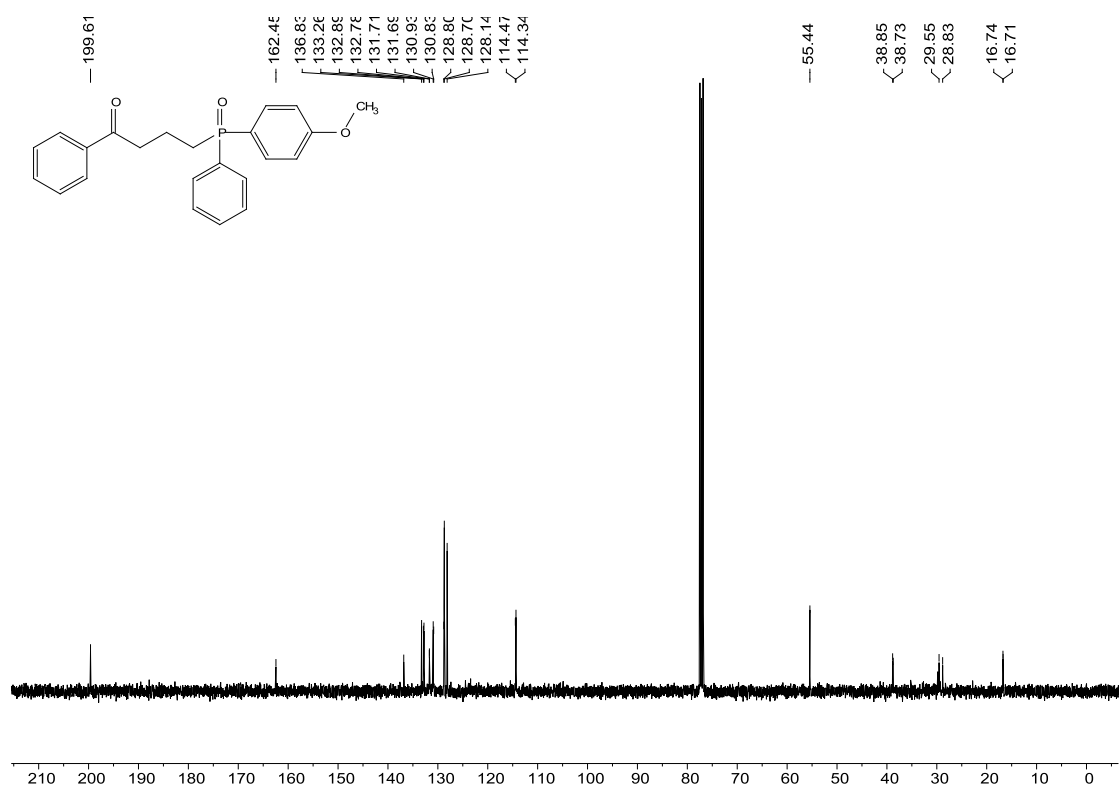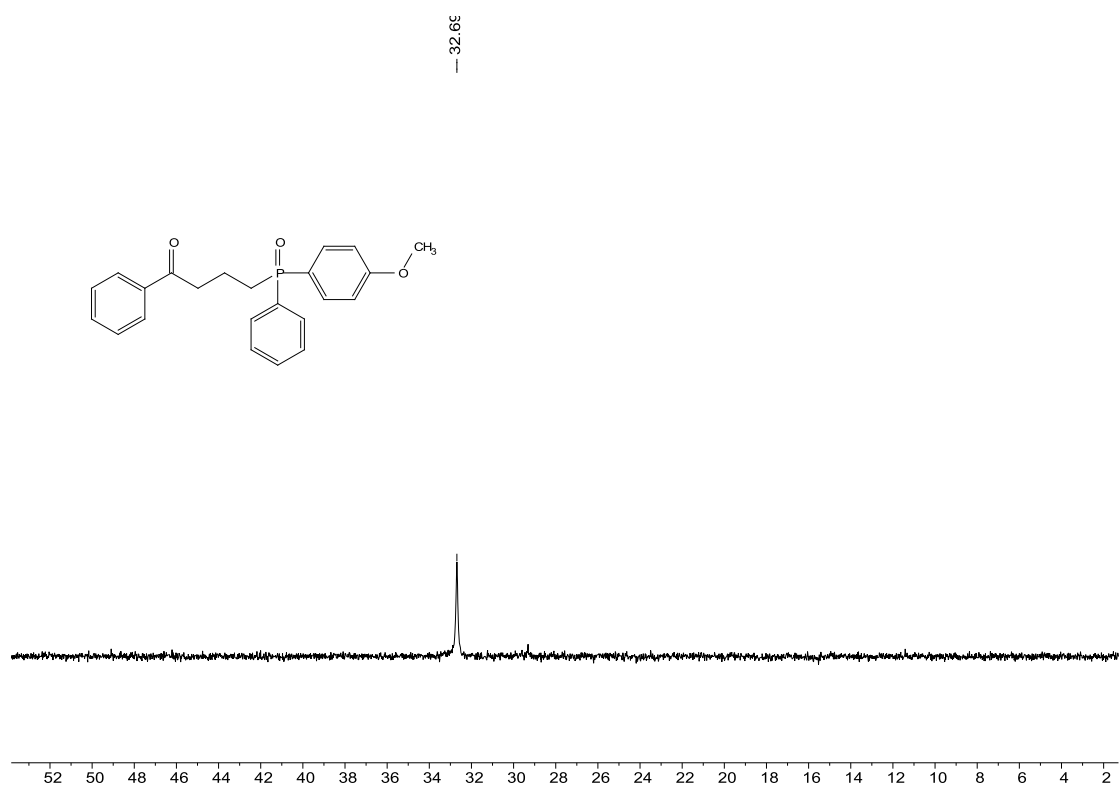

4d

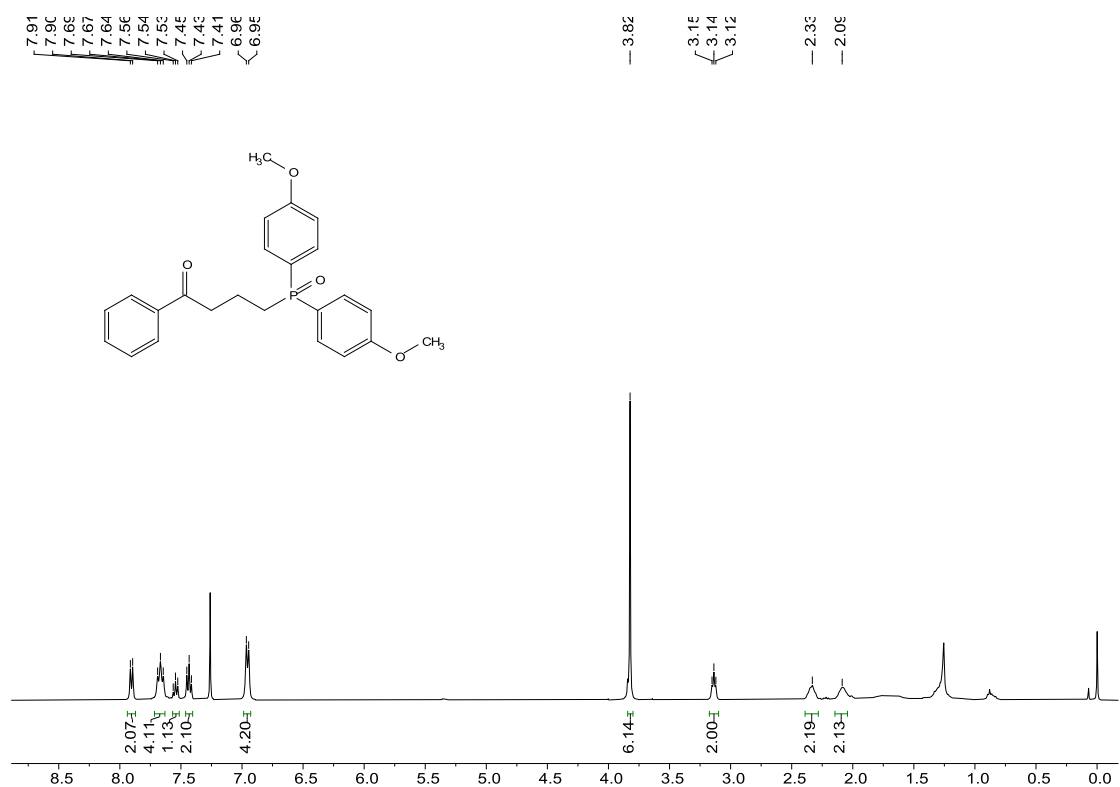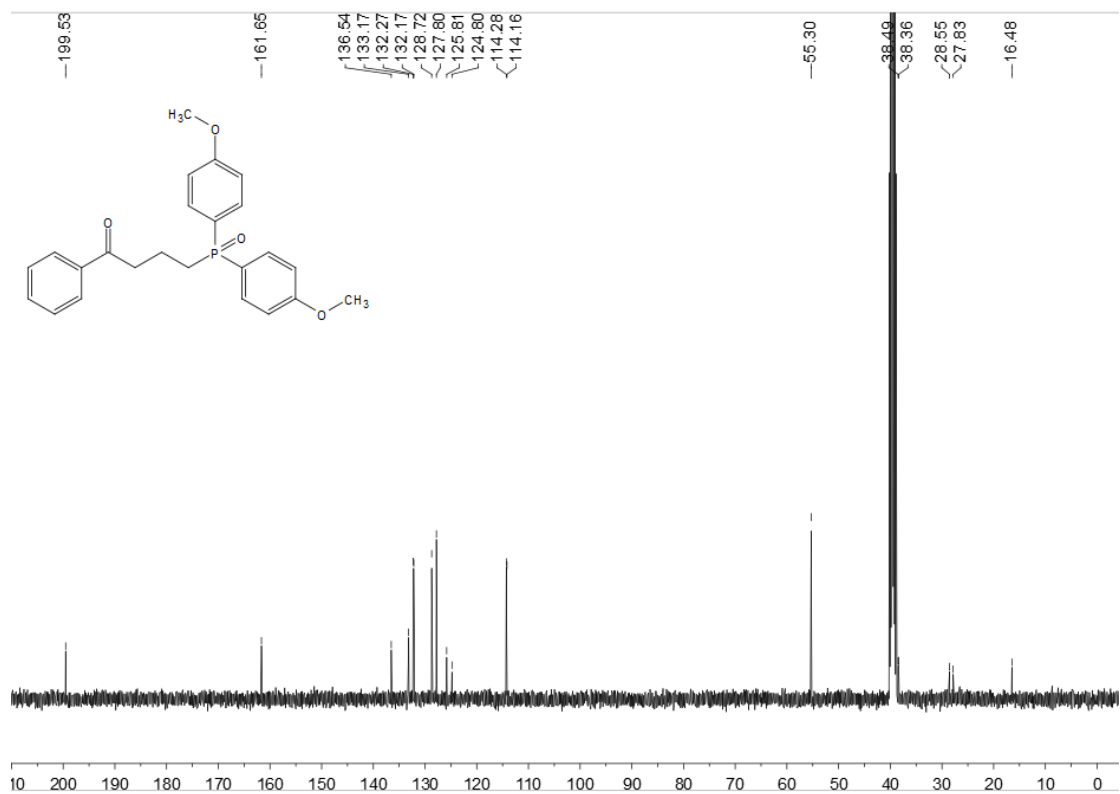

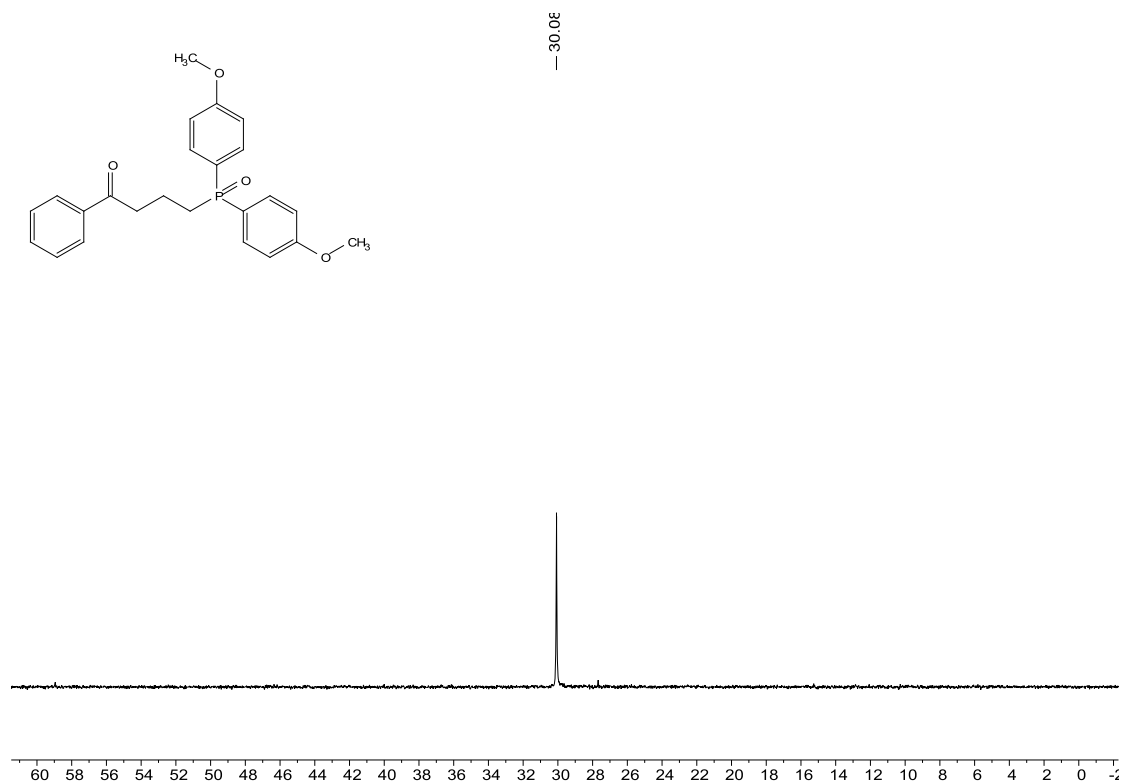

4e

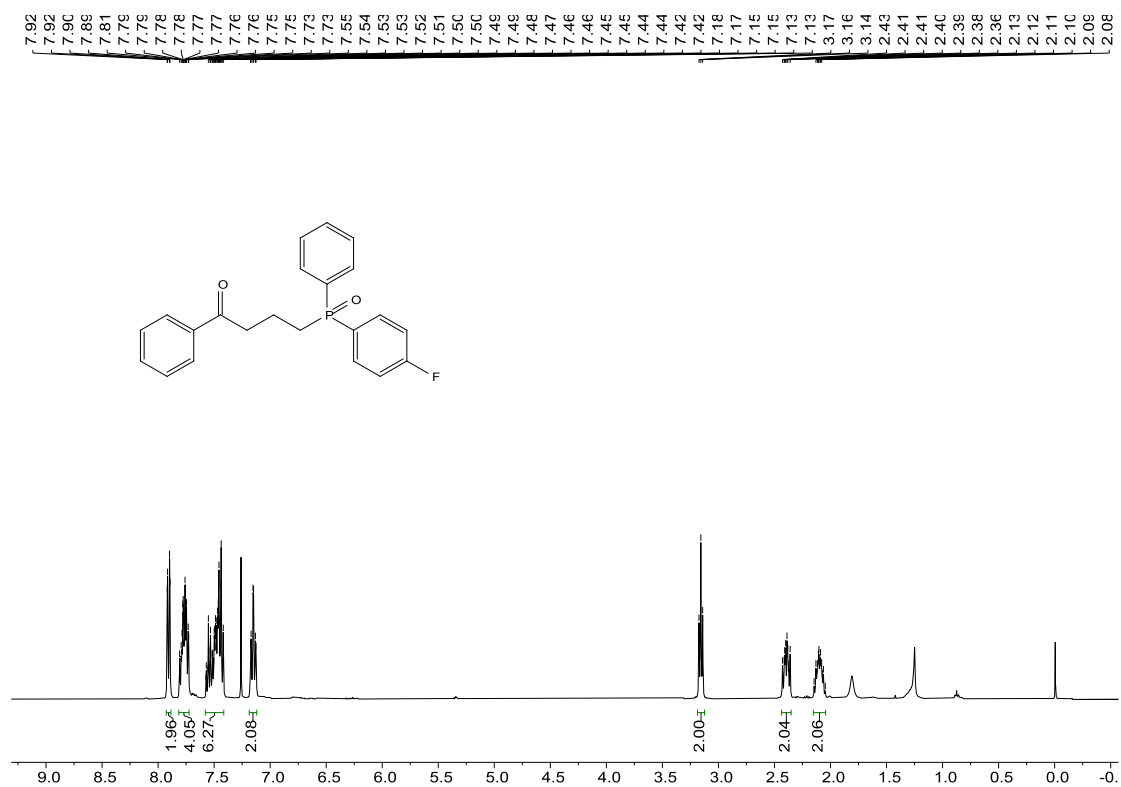

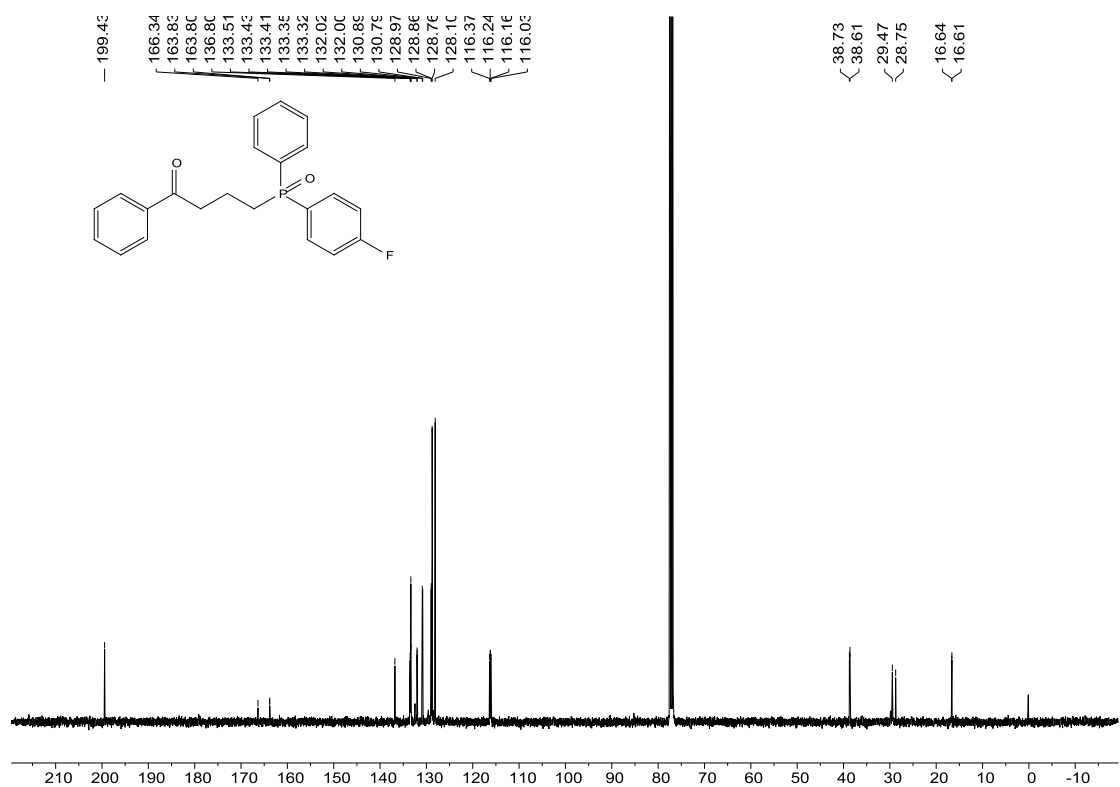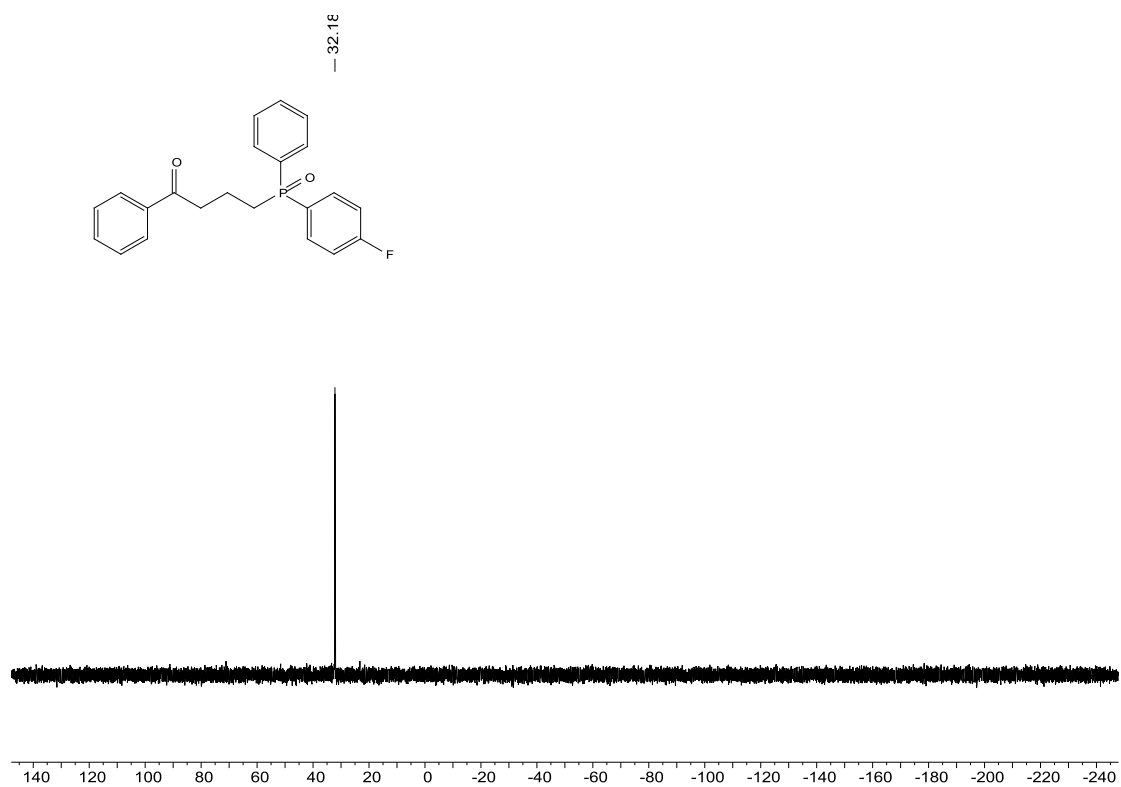

4f

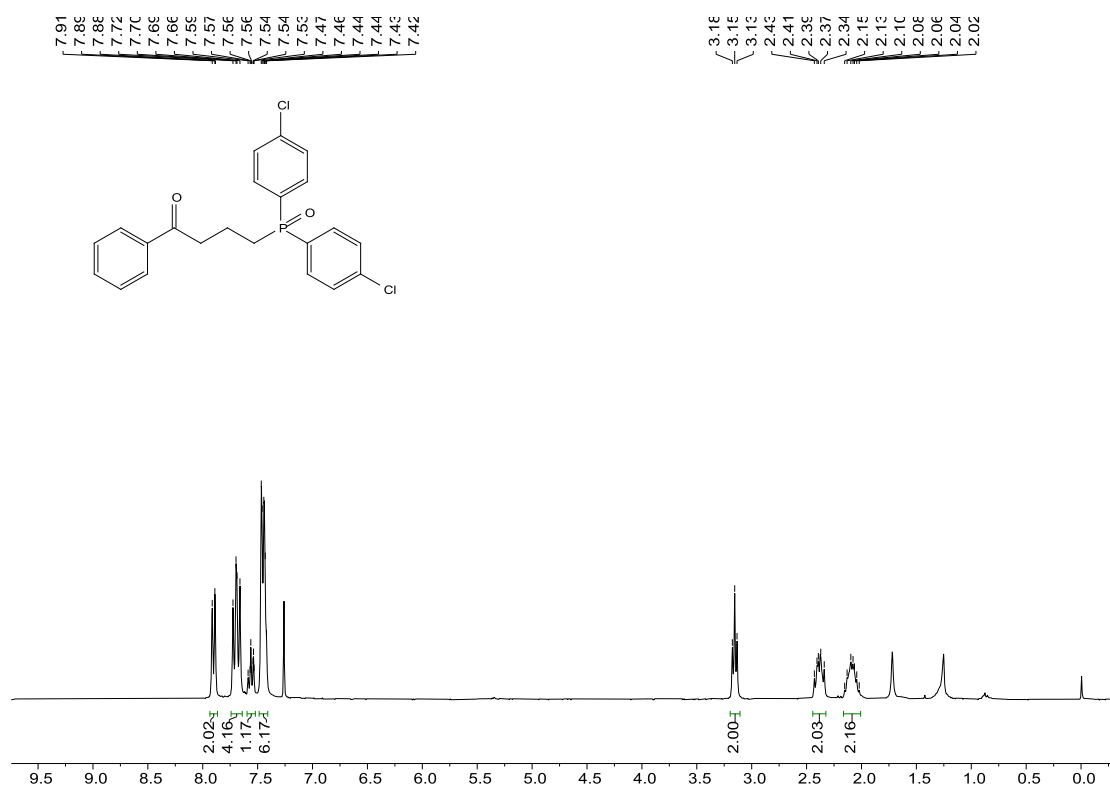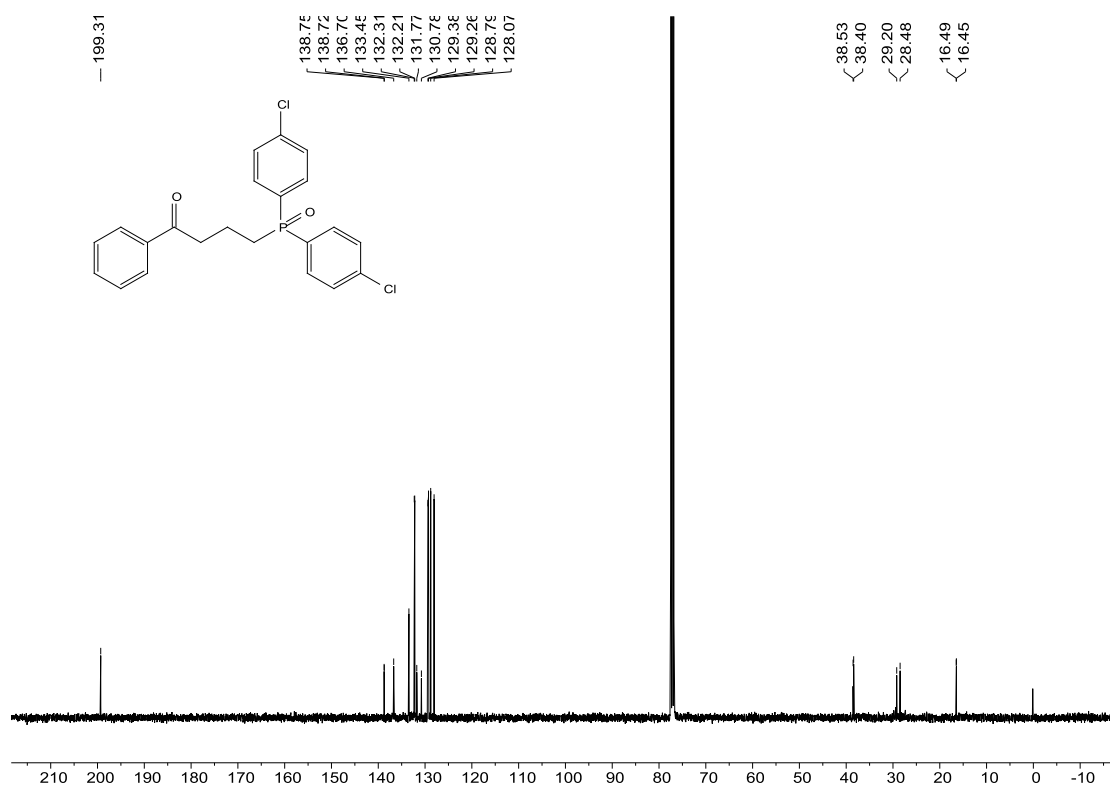

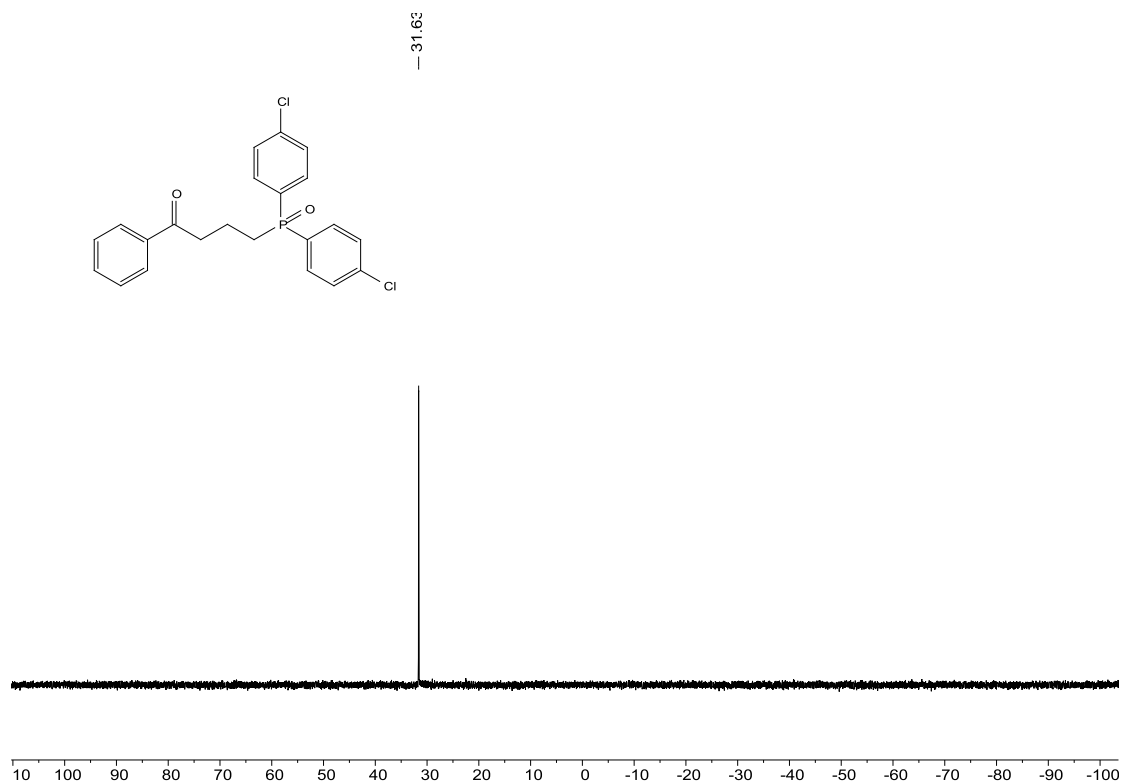

4g

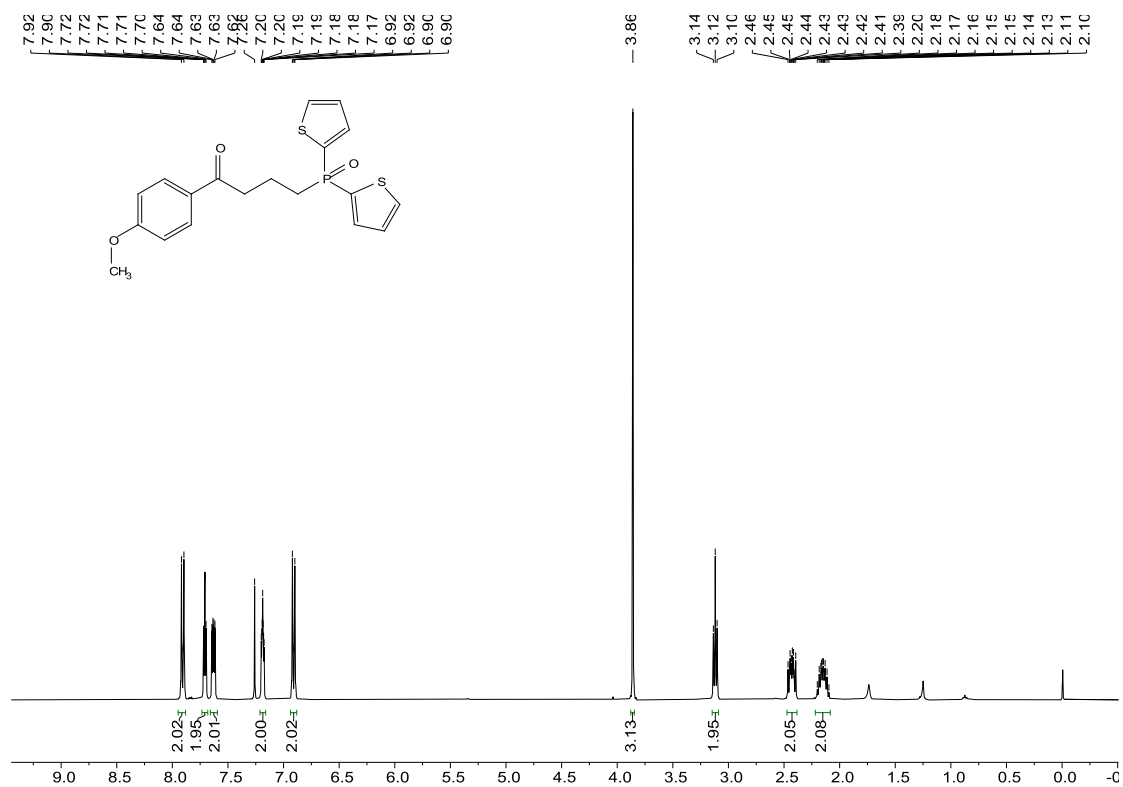



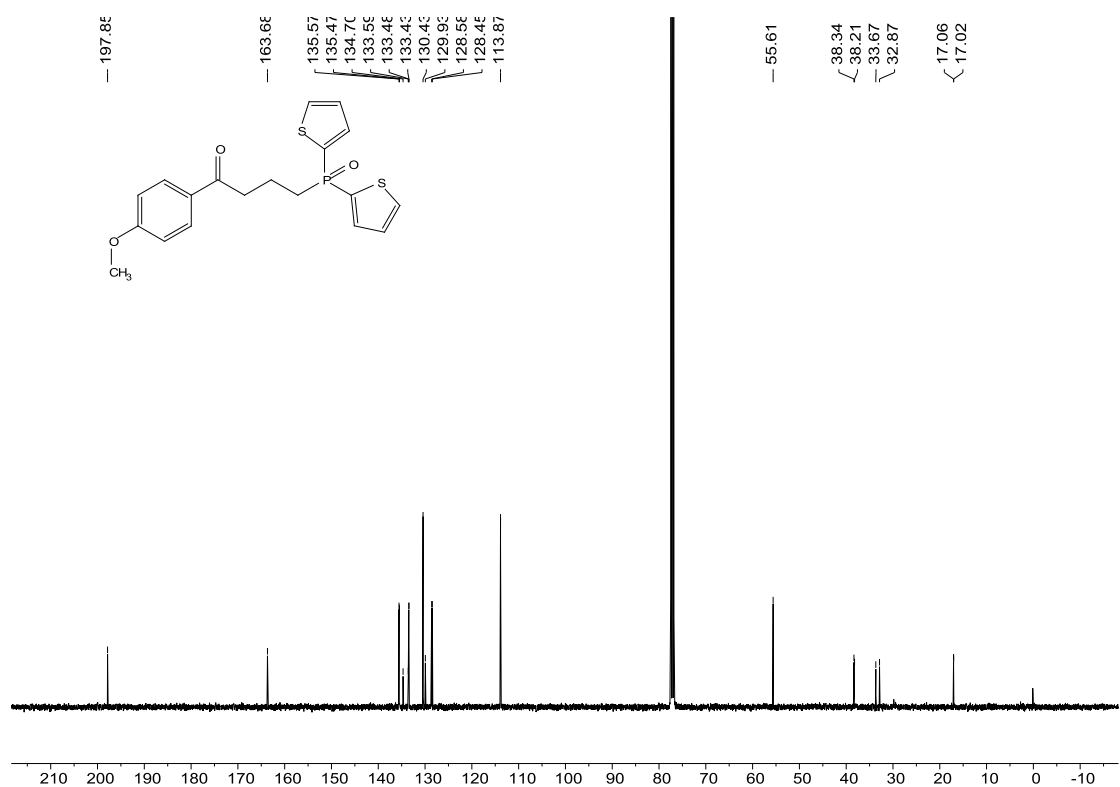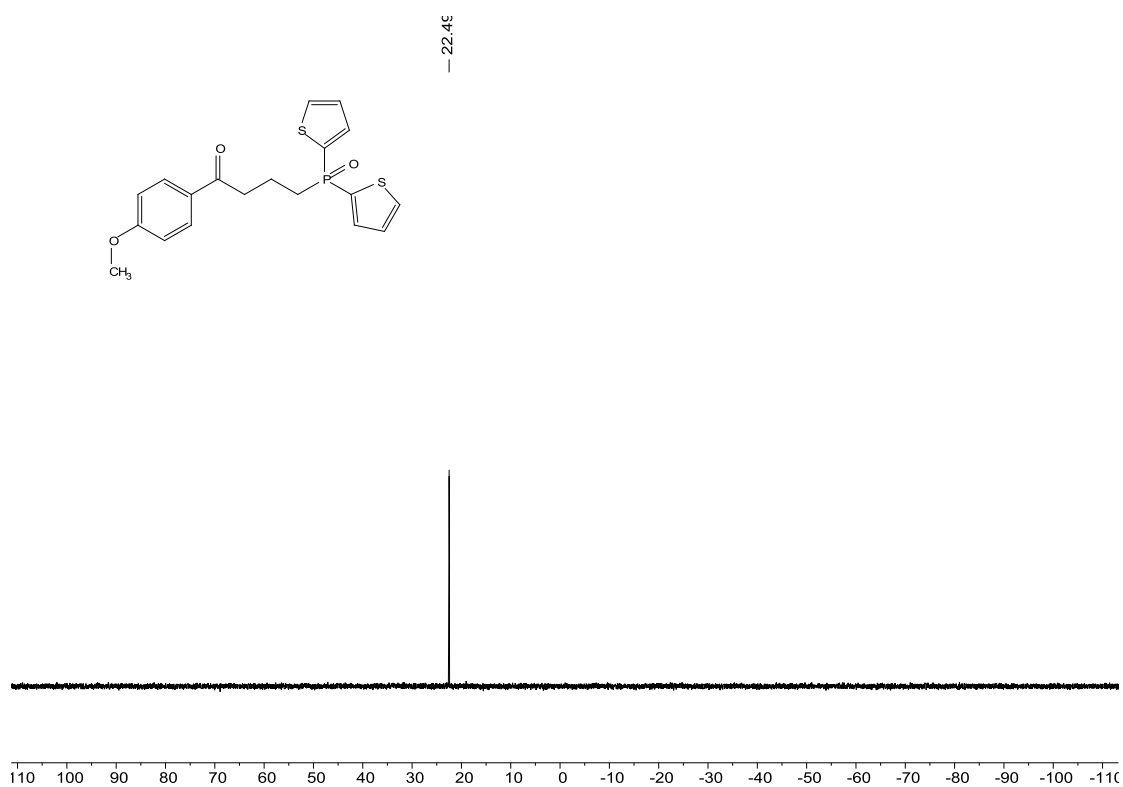

Chemical structure: O=C(CCP(=O)(c1ccccc1)c2ccsc2)c3ccccc3

<sup>1</sup>H NMR spectrum (CDCl<sub>3</sub>) showing peaks in the aromatic region (7.1-8.0 ppm), a carbonyl singlet (3.5 ppm), and aliphatic signals (2.1-2.5 ppm). Integration values are provided below the baseline.

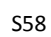

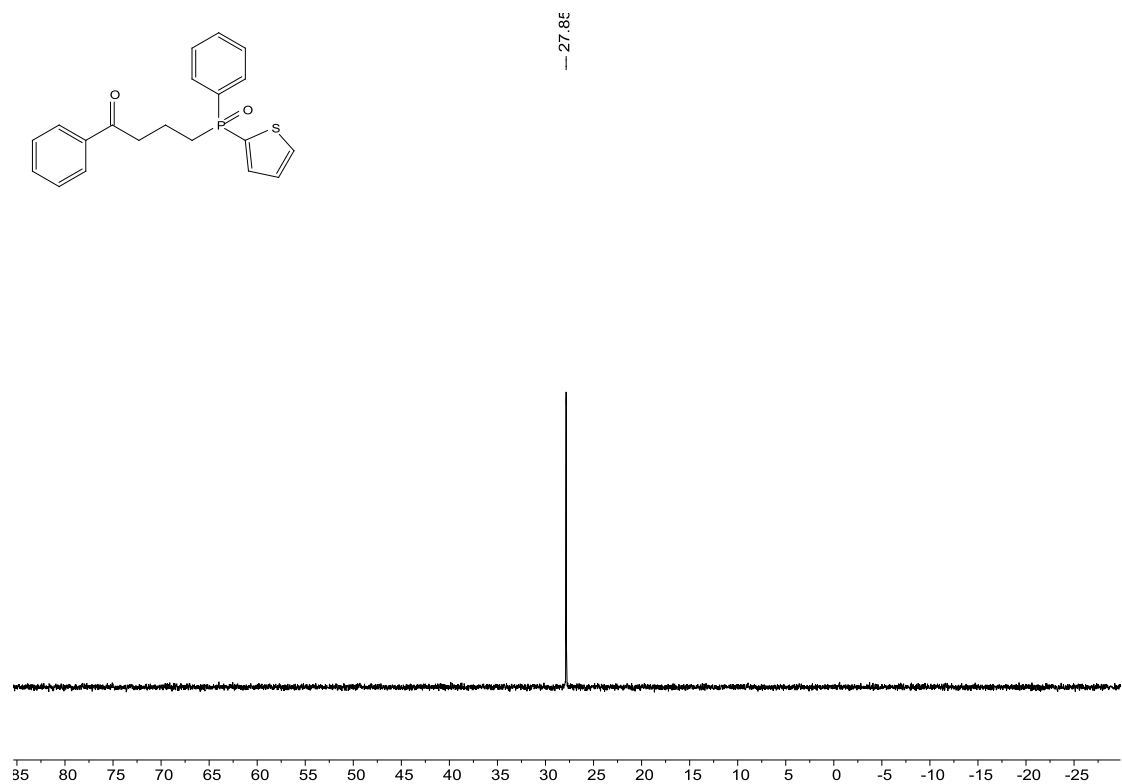

4i

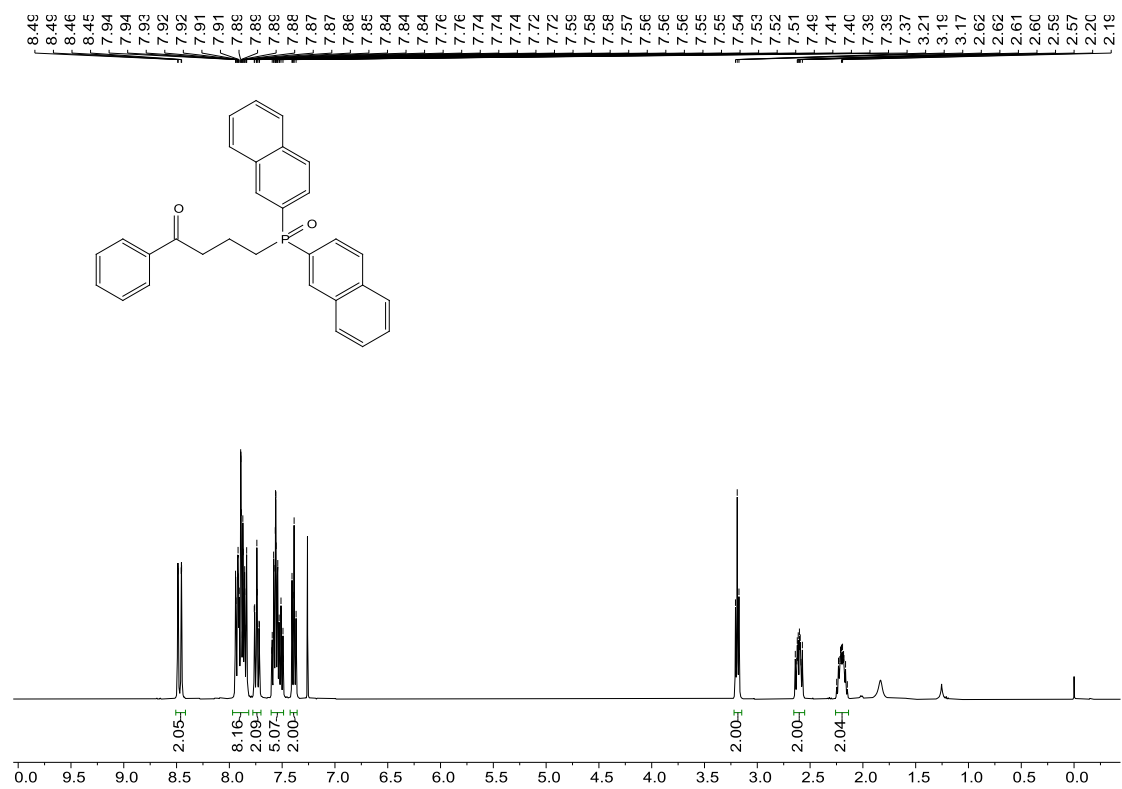

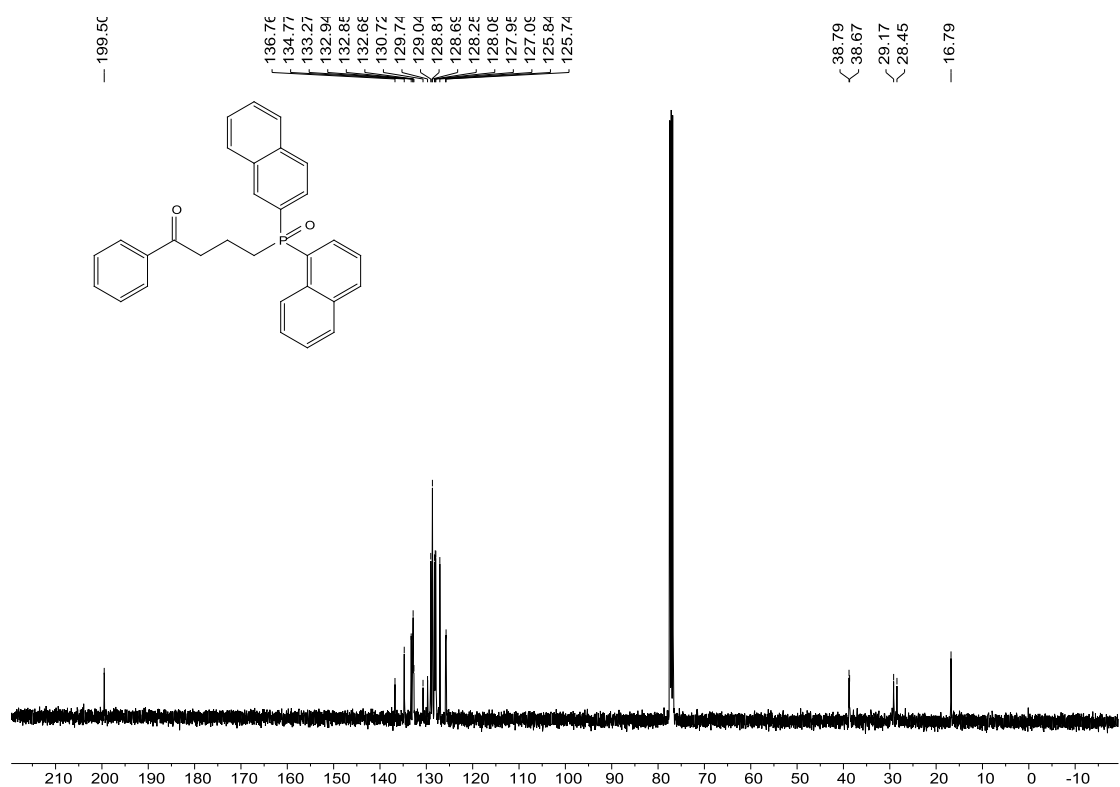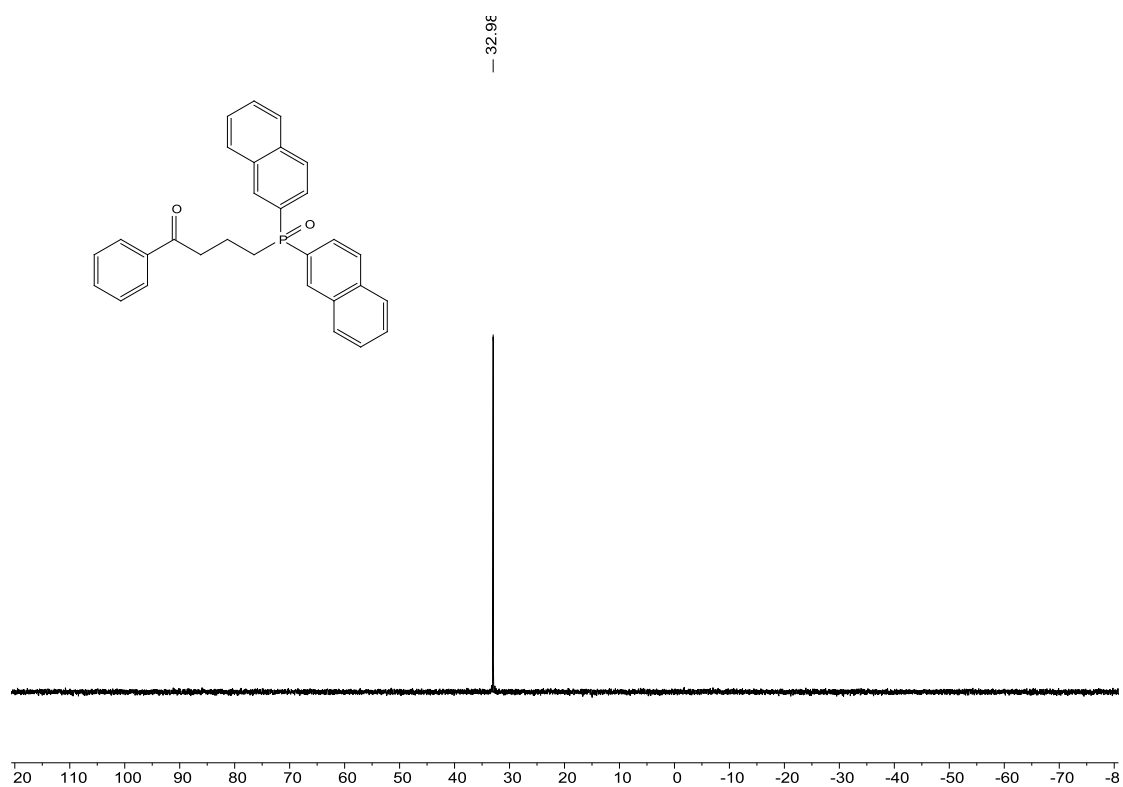

7

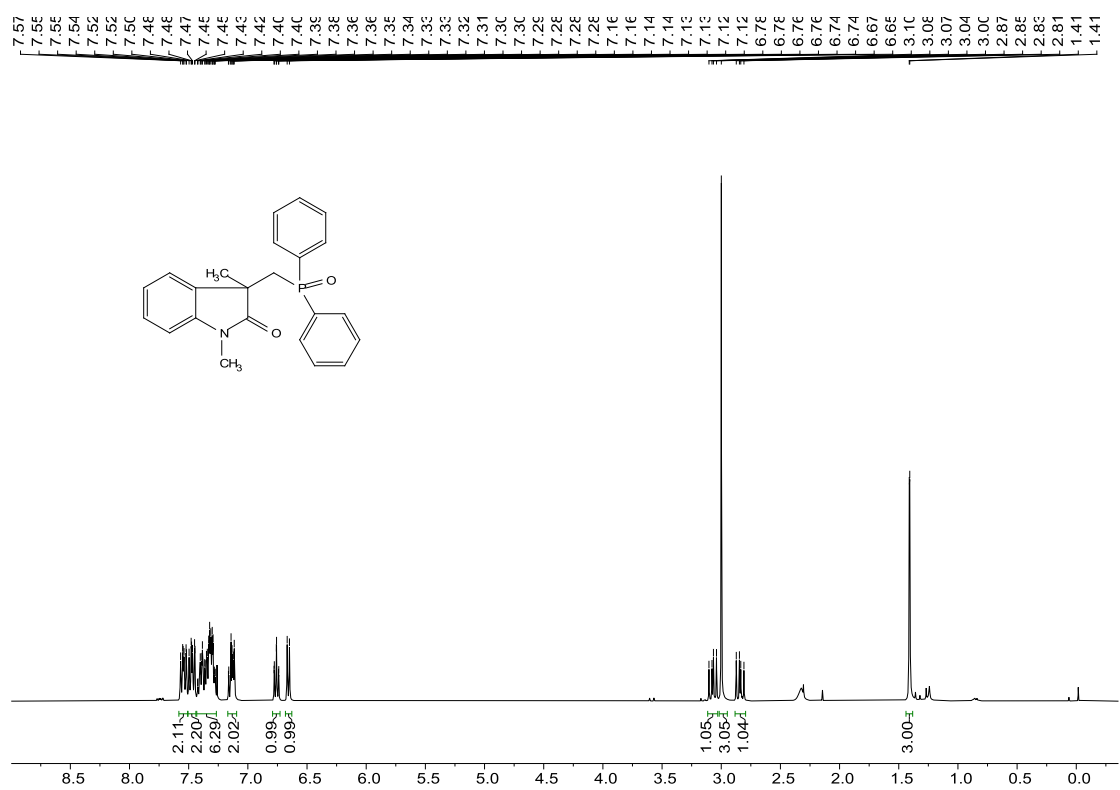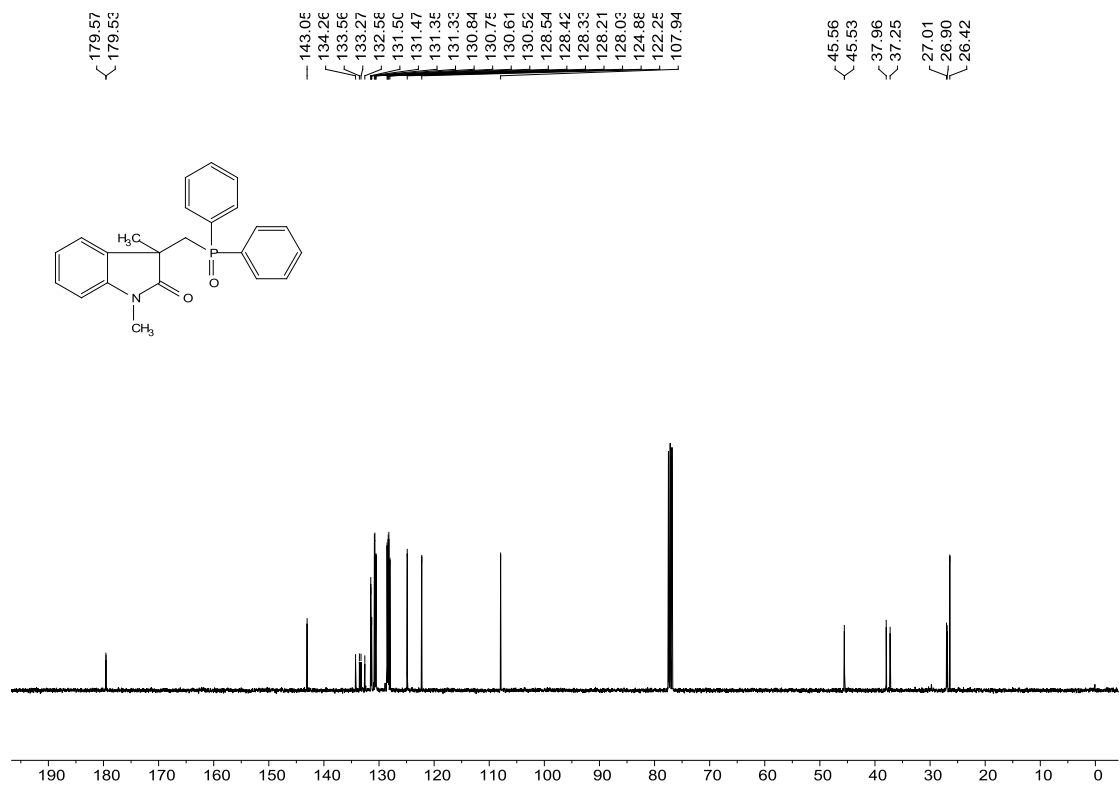

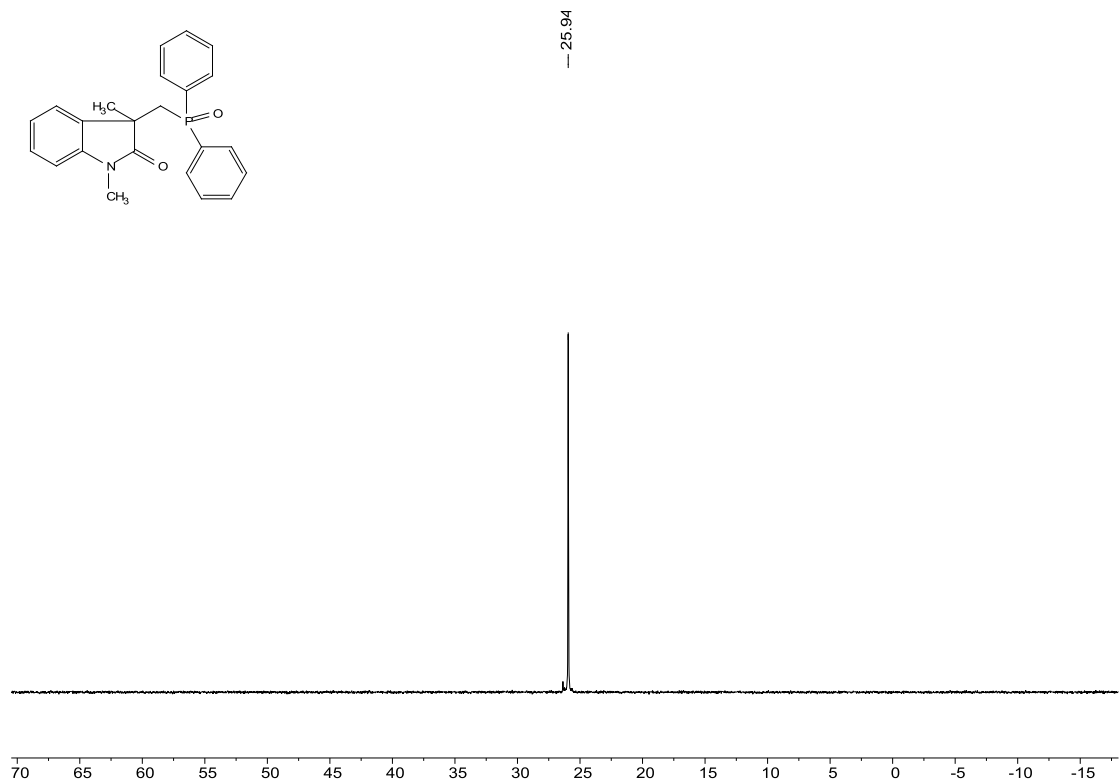

8

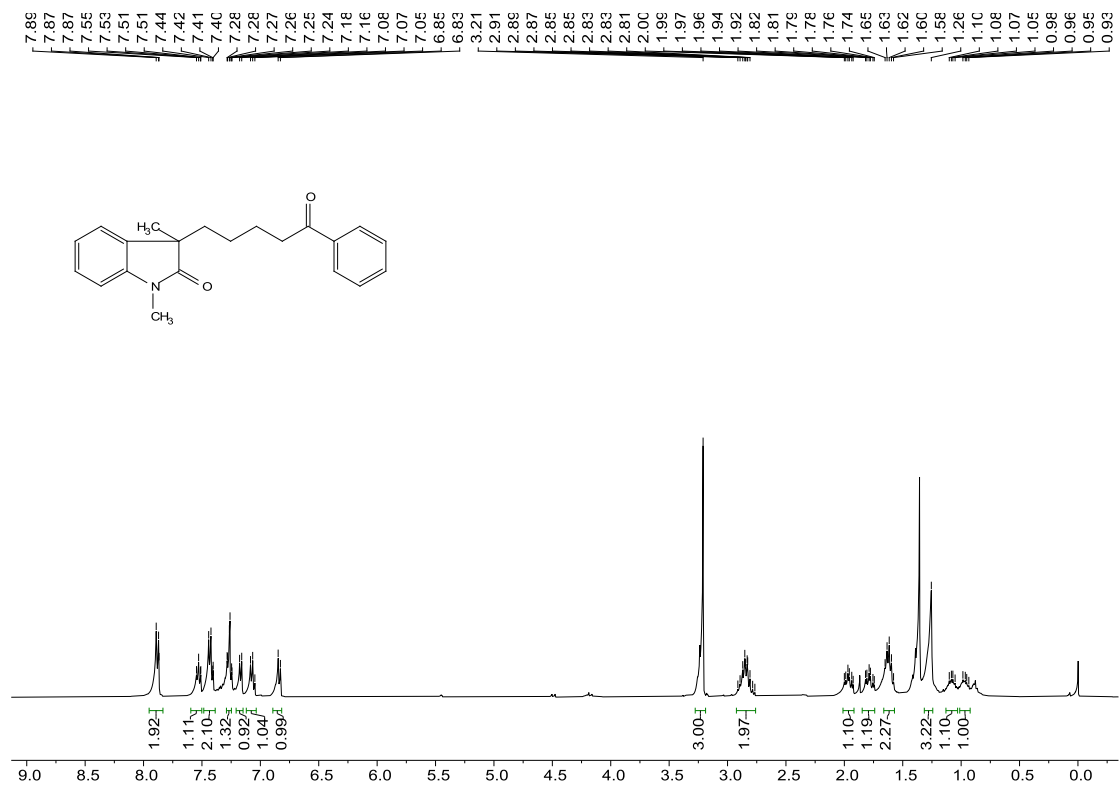

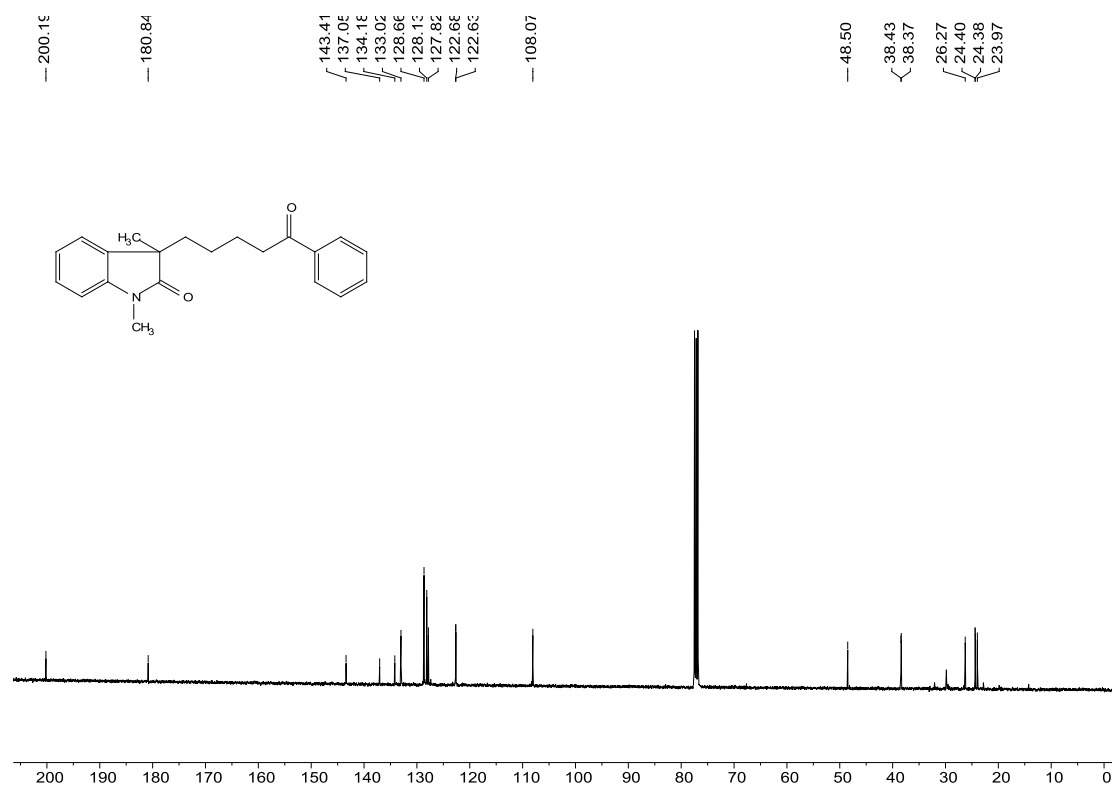

Supplement: d2qo00359g1.pdf [file d2qo00359g1.pdf]
